# Supplementary material for: Physiological Response of Corynebacterium glutamicum to Increasingly Nutrient-Rich Growth Conditions
Source: Front Microbiol. 2018 Aug 29;9:2058. doi: 10.3389/fmicb.2018.02058 (PMC6123352; doi:10.3389/fmicb.2018.02058)
Supplement: Supplementary file 4 [file Data_Sheet_2.ZIP › iMG481.xml]

<?xml version="1.0" encoding="UTF-8"?>
<sbml xmlns="http://www.sbml.org/sbml/level3/version1/core" xmlns:fbc="http://www.sbml.org/sbml/level3/version1/fbc/version2" level="3" version="1" fbc:required="false">
  <model metaid="COBRAModel" id="COBRAModel" fbc:strict="true">
    <listOfUnitDefinitions>
      <unitDefinition id="mmol_per_gDW_per_hr">
        <listOfUnits>
          <unit kind="mole" exponent="1" scale="-3" multiplier="1"/>
          <unit kind="gram" exponent="-1" scale="0" multiplier="1"/>
          <unit kind="second" exponent="-1" scale="0" multiplier="3600"/>
        </listOfUnits>
      </unitDefinition>
    </listOfUnitDefinitions>
    <listOfCompartments>
      <compartment metaid="c" sboTerm="SBO:0000240" id="c" name="Cytoplasm" spatialDimensions="3" size="1" constant="true"/>
      <compartment metaid="e" sboTerm="SBO:0000240" id="e" name="Extracellular" spatialDimensions="3" size="1" constant="true"/>
    </listOfCompartments>
    <listOfSpecies>
      <species metaid="M_h_c" id="M_h_c" name="M_h_c" compartment="c" initialAmount="1" hasOnlySubstanceUnits="false" boundaryCondition="false" constant="false"/>
      <species metaid="M_h_e" id="M_h_e" name="M_h_e" compartment="e" initialAmount="1" hasOnlySubstanceUnits="false" boundaryCondition="false" constant="false"/>
      <species metaid="M_atp_c" id="M_atp_c" name="M_atp_c" compartment="c" initialAmount="1" hasOnlySubstanceUnits="false" boundaryCondition="false" constant="false"/>
      <species metaid="M_glc_D_c" id="M_glc_D_c" name="M_glc_D_c" compartment="c" initialAmount="1" hasOnlySubstanceUnits="false" boundaryCondition="false" constant="false"/>
      <species metaid="M_adp_c" id="M_adp_c" name="M_adp_c" compartment="c" initialAmount="1" hasOnlySubstanceUnits="false" boundaryCondition="false" constant="false"/>
      <species metaid="M_g6p_c" id="M_g6p_c" name="M_g6p_c" compartment="c" initialAmount="1" hasOnlySubstanceUnits="false" boundaryCondition="false" constant="false"/>
      <species metaid="M_f6p_c" id="M_f6p_c" name="M_f6p_c" compartment="c" initialAmount="1" hasOnlySubstanceUnits="false" boundaryCondition="false" constant="false"/>
      <species metaid="M_fdp_c" id="M_fdp_c" name="M_fdp_c" compartment="c" initialAmount="1" hasOnlySubstanceUnits="false" boundaryCondition="false" constant="false"/>
      <species metaid="M_h2o_c" id="M_h2o_c" name="M_h2o_c" compartment="c" initialAmount="1" hasOnlySubstanceUnits="false" boundaryCondition="false" constant="false"/>
      <species metaid="M_pi_c" id="M_pi_c" name="M_pi_c" compartment="c" initialAmount="1" hasOnlySubstanceUnits="false" boundaryCondition="false" constant="false"/>
      <species metaid="M_dhap_c" id="M_dhap_c" name="M_dhap_c" compartment="c" initialAmount="1" hasOnlySubstanceUnits="false" boundaryCondition="false" constant="false"/>
      <species metaid="M_g3p_c" id="M_g3p_c" name="M_g3p_c" compartment="c" initialAmount="1" hasOnlySubstanceUnits="false" boundaryCondition="false" constant="false"/>
      <species metaid="M_nad_c" id="M_nad_c" name="M_nad_c" compartment="c" initialAmount="1" hasOnlySubstanceUnits="false" boundaryCondition="false" constant="false"/>
      <species metaid="M_13dpg_c" id="M_13dpg_c" name="M_13dpg_c" compartment="c" initialAmount="1" hasOnlySubstanceUnits="false" boundaryCondition="false" constant="false"/>
      <species metaid="M_nadh_c" id="M_nadh_c" name="M_nadh_c" compartment="c" initialAmount="1" hasOnlySubstanceUnits="false" boundaryCondition="false" constant="false"/>
      <species metaid="M_nadph_c" id="M_nadph_c" name="M_nadph_c" compartment="c" initialAmount="1" hasOnlySubstanceUnits="false" boundaryCondition="false" constant="false"/>
      <species metaid="M_nadp_c" id="M_nadp_c" name="M_nadp_c" compartment="c" initialAmount="1" hasOnlySubstanceUnits="false" boundaryCondition="false" constant="false"/>
      <species metaid="M_3pg_c" id="M_3pg_c" name="M_3pg_c" compartment="c" initialAmount="1" hasOnlySubstanceUnits="false" boundaryCondition="false" constant="false"/>
      <species metaid="M_2pg_c" id="M_2pg_c" name="M_2pg_c" compartment="c" initialAmount="1" hasOnlySubstanceUnits="false" boundaryCondition="false" constant="false"/>
      <species metaid="M_pep_c" id="M_pep_c" name="M_pep_c" compartment="c" initialAmount="1" hasOnlySubstanceUnits="false" boundaryCondition="false" constant="false"/>
      <species metaid="M_pyr_c" id="M_pyr_c" name="M_pyr_c" compartment="c" initialAmount="1" hasOnlySubstanceUnits="false" boundaryCondition="false" constant="false"/>
      <species metaid="M_lac_L_c" id="M_lac_L_c" name="M_lac_L_c" compartment="c" initialAmount="1" hasOnlySubstanceUnits="false" boundaryCondition="false" constant="false"/>
      <species metaid="M_amp_c" id="M_amp_c" name="M_amp_c" compartment="c" initialAmount="1" hasOnlySubstanceUnits="false" boundaryCondition="false" constant="false"/>
      <species metaid="M_mal_L_c" id="M_mal_L_c" name="M_mal_L_c" compartment="c" initialAmount="1" hasOnlySubstanceUnits="false" boundaryCondition="false" constant="false"/>
      <species metaid="M_co2_c" id="M_co2_c" name="M_co2_c" compartment="c" initialAmount="1" hasOnlySubstanceUnits="false" boundaryCondition="false" constant="false"/>
      <species metaid="M_accoa_c" id="M_accoa_c" name="M_accoa_c" compartment="c" initialAmount="1" hasOnlySubstanceUnits="false" boundaryCondition="false" constant="false"/>
      <species metaid="M_actp_c" id="M_actp_c" name="M_actp_c" compartment="c" initialAmount="1" hasOnlySubstanceUnits="false" boundaryCondition="false" constant="false"/>
      <species metaid="M_coa_c" id="M_coa_c" name="M_coa_c" compartment="c" initialAmount="1" hasOnlySubstanceUnits="false" boundaryCondition="false" constant="false"/>
      <species metaid="M_ac_c" id="M_ac_c" name="M_ac_c" compartment="c" initialAmount="1" hasOnlySubstanceUnits="false" boundaryCondition="false" constant="false"/>
      <species metaid="M_q8_c" id="M_q8_c" name="M_q8_c" compartment="c" initialAmount="1" hasOnlySubstanceUnits="false" boundaryCondition="false" constant="false"/>
      <species metaid="M_q8h2_c" id="M_q8h2_c" name="M_q8h2_c" compartment="c" initialAmount="1" hasOnlySubstanceUnits="false" boundaryCondition="false" constant="false"/>
      <species metaid="M_for_c" id="M_for_c" name="M_for_c" compartment="c" initialAmount="1" hasOnlySubstanceUnits="false" boundaryCondition="false" constant="false"/>
      <species metaid="M_oaa_c" id="M_oaa_c" name="M_oaa_c" compartment="c" initialAmount="1" hasOnlySubstanceUnits="false" boundaryCondition="false" constant="false"/>
      <species metaid="M_cit_c" id="M_cit_c" name="M_cit_c" compartment="c" initialAmount="1" hasOnlySubstanceUnits="false" boundaryCondition="false" constant="false"/>
      <species metaid="M_acn_c" id="M_acn_c" name="M_acn_c" compartment="c" initialAmount="1" hasOnlySubstanceUnits="false" boundaryCondition="false" constant="false"/>
      <species metaid="M_icit_c" id="M_icit_c" name="M_icit_c" compartment="c" initialAmount="1" hasOnlySubstanceUnits="false" boundaryCondition="false" constant="false"/>
      <species metaid="M_akg_c" id="M_akg_c" name="M_akg_c" compartment="c" initialAmount="1" hasOnlySubstanceUnits="false" boundaryCondition="false" constant="false"/>
      <species metaid="M_succoa_c" id="M_succoa_c" name="M_succoa_c" compartment="c" initialAmount="1" hasOnlySubstanceUnits="false" boundaryCondition="false" constant="false"/>
      <species metaid="M_suc_c" id="M_suc_c" name="M_suc_c" compartment="c" initialAmount="1" hasOnlySubstanceUnits="false" boundaryCondition="false" constant="false"/>
      <species metaid="M_fum_c" id="M_fum_c" name="M_fum_c" compartment="c" initialAmount="1" hasOnlySubstanceUnits="false" boundaryCondition="false" constant="false"/>
      <species metaid="M_glx_c" id="M_glx_c" name="M_glx_c" compartment="c" initialAmount="1" hasOnlySubstanceUnits="false" boundaryCondition="false" constant="false"/>
      <species metaid="M_gtp_c" id="M_gtp_c" name="M_gtp_c" compartment="c" initialAmount="1" hasOnlySubstanceUnits="false" boundaryCondition="false" constant="false"/>
      <species metaid="M_gdp_c" id="M_gdp_c" name="M_gdp_c" compartment="c" initialAmount="1" hasOnlySubstanceUnits="false" boundaryCondition="false" constant="false"/>
      <species metaid="M_hco3_c" id="M_hco3_c" name="M_hco3_c" compartment="c" initialAmount="1" hasOnlySubstanceUnits="false" boundaryCondition="false" constant="false"/>
      <species metaid="M_6pgl_c" id="M_6pgl_c" name="M_6pgl_c" compartment="c" initialAmount="1" hasOnlySubstanceUnits="false" boundaryCondition="false" constant="false"/>
      <species metaid="M_6pgc_c" id="M_6pgc_c" name="M_6pgc_c" compartment="c" initialAmount="1" hasOnlySubstanceUnits="false" boundaryCondition="false" constant="false"/>
      <species metaid="M_ru5p_D_c" id="M_ru5p_D_c" name="M_ru5p_D_c" compartment="c" initialAmount="1" hasOnlySubstanceUnits="false" boundaryCondition="false" constant="false"/>
      <species metaid="M_r5p_c" id="M_r5p_c" name="M_r5p_c" compartment="c" initialAmount="1" hasOnlySubstanceUnits="false" boundaryCondition="false" constant="false"/>
      <species metaid="M_xu5p_D_c" id="M_xu5p_D_c" name="M_xu5p_D_c" compartment="c" initialAmount="1" hasOnlySubstanceUnits="false" boundaryCondition="false" constant="false"/>
      <species metaid="M_s7p_c" id="M_s7p_c" name="M_s7p_c" compartment="c" initialAmount="1" hasOnlySubstanceUnits="false" boundaryCondition="false" constant="false"/>
      <species metaid="M_e4p_c" id="M_e4p_c" name="M_e4p_c" compartment="c" initialAmount="1" hasOnlySubstanceUnits="false" boundaryCondition="false" constant="false"/>
      <species metaid="M_o2_c" id="M_o2_c" name="M_o2_c" compartment="c" initialAmount="1" hasOnlySubstanceUnits="false" boundaryCondition="false" constant="false"/>
      <species metaid="M_trdox_c" id="M_trdox_c" name="M_trdox_c" compartment="c" initialAmount="1" hasOnlySubstanceUnits="false" boundaryCondition="false" constant="false"/>
      <species metaid="M_trdrd_c" id="M_trdrd_c" name="M_trdrd_c" compartment="c" initialAmount="1" hasOnlySubstanceUnits="false" boundaryCondition="false" constant="false"/>
      <species metaid="M_h2s_c" id="M_h2s_c" name="M_h2s_c" compartment="c" initialAmount="1" hasOnlySubstanceUnits="false" boundaryCondition="false" constant="false"/>
      <species metaid="M_so3_c" id="M_so3_c" name="M_so3_c" compartment="c" initialAmount="1" hasOnlySubstanceUnits="false" boundaryCondition="false" constant="false"/>
      <species metaid="M_glyc3p_c" id="M_glyc3p_c" name="M_glyc3p_c" compartment="c" initialAmount="1" hasOnlySubstanceUnits="false" boundaryCondition="false" constant="false"/>
      <species metaid="M_pro_L_c" id="M_pro_L_c" name="M_pro_L_c" compartment="c" initialAmount="1" hasOnlySubstanceUnits="false" boundaryCondition="false" constant="false"/>
      <species metaid="M_1pyr5c_c" id="M_1pyr5c_c" name="M_1pyr5c_c" compartment="c" initialAmount="1" hasOnlySubstanceUnits="false" boundaryCondition="false" constant="false"/>
      <species metaid="M_no3_c" id="M_no3_c" name="M_no3_c" compartment="c" initialAmount="1" hasOnlySubstanceUnits="false" boundaryCondition="false" constant="false"/>
      <species metaid="M_no2_c" id="M_no2_c" name="M_no2_c" compartment="c" initialAmount="1" hasOnlySubstanceUnits="false" boundaryCondition="false" constant="false"/>
      <species metaid="M_malcoa_c" id="M_malcoa_c" name="M_malcoa_c" compartment="c" initialAmount="1" hasOnlySubstanceUnits="false" boundaryCondition="false" constant="false"/>
      <species metaid="M_ACP_c" id="M_ACP_c" name="M_ACP_c" compartment="c" initialAmount="1" hasOnlySubstanceUnits="false" boundaryCondition="false" constant="false"/>
      <species metaid="M_acACP_c" id="M_acACP_c" name="M_acACP_c" compartment="c" initialAmount="1" hasOnlySubstanceUnits="false" boundaryCondition="false" constant="false"/>
      <species metaid="M_malACP_c" id="M_malACP_c" name="M_malACP_c" compartment="c" initialAmount="1" hasOnlySubstanceUnits="false" boundaryCondition="false" constant="false"/>
      <species metaid="M_actACP_c" id="M_actACP_c" name="M_actACP_c" compartment="c" initialAmount="1" hasOnlySubstanceUnits="false" boundaryCondition="false" constant="false"/>
      <species metaid="M_C140ACP_c" id="M_C140ACP_c" name="M_C140ACP_c" compartment="c" initialAmount="1" hasOnlySubstanceUnits="false" boundaryCondition="false" constant="false"/>
      <species metaid="M_C150ACP_c" id="M_C150ACP_c" name="M_C150ACP_c" compartment="c" initialAmount="1" hasOnlySubstanceUnits="false" boundaryCondition="false" constant="false"/>
      <species metaid="M_C160ACP_c" id="M_C160ACP_c" name="M_C160ACP_c" compartment="c" initialAmount="1" hasOnlySubstanceUnits="false" boundaryCondition="false" constant="false"/>
      <species metaid="M_C180ACP_c" id="M_C180ACP_c" name="M_C180ACP_c" compartment="c" initialAmount="1" hasOnlySubstanceUnits="false" boundaryCondition="false" constant="false"/>
      <species metaid="M_C161ACP_c" id="M_C161ACP_c" name="M_C161ACP_c" compartment="c" initialAmount="1" hasOnlySubstanceUnits="false" boundaryCondition="false" constant="false"/>
      <species metaid="M_C181ACP_c" id="M_C181ACP_c" name="M_C181ACP_c" compartment="c" initialAmount="1" hasOnlySubstanceUnits="false" boundaryCondition="false" constant="false"/>
      <species metaid="M_AGL3P_c" id="M_AGL3P_c" name="M_AGL3P_c" compartment="c" initialAmount="1" hasOnlySubstanceUnits="false" boundaryCondition="false" constant="false"/>
      <species metaid="M_pa_EC_c" id="M_pa_EC_c" name="M_pa_EC_c" compartment="c" initialAmount="1" hasOnlySubstanceUnits="false" boundaryCondition="false" constant="false"/>
      <species metaid="M_cdpdag_EC_c" id="M_cdpdag_EC_c" name="M_cdpdag_EC_c" compartment="c" initialAmount="1" hasOnlySubstanceUnits="false" boundaryCondition="false" constant="false"/>
      <species metaid="M_cmp_c" id="M_cmp_c" name="M_cmp_c" compartment="c" initialAmount="1" hasOnlySubstanceUnits="false" boundaryCondition="false" constant="false"/>
      <species metaid="M_pgp_EC_c" id="M_pgp_EC_c" name="M_pgp_EC_c" compartment="c" initialAmount="1" hasOnlySubstanceUnits="false" boundaryCondition="false" constant="false"/>
      <species metaid="M_ser_L_c" id="M_ser_L_c" name="M_ser_L_c" compartment="c" initialAmount="1" hasOnlySubstanceUnits="false" boundaryCondition="false" constant="false"/>
      <species metaid="M_ps_EC_c" id="M_ps_EC_c" name="M_ps_EC_c" compartment="c" initialAmount="1" hasOnlySubstanceUnits="false" boundaryCondition="false" constant="false"/>
      <species metaid="M_pg_EC_c" id="M_pg_EC_c" name="M_pg_EC_c" compartment="c" initialAmount="1" hasOnlySubstanceUnits="false" boundaryCondition="false" constant="false"/>
      <species metaid="M_prpp_c" id="M_prpp_c" name="M_prpp_c" compartment="c" initialAmount="1" hasOnlySubstanceUnits="false" boundaryCondition="false" constant="false"/>
      <species metaid="M_gln_L_c" id="M_gln_L_c" name="M_gln_L_c" compartment="c" initialAmount="1" hasOnlySubstanceUnits="false" boundaryCondition="false" constant="false"/>
      <species metaid="M_glu_L_c" id="M_glu_L_c" name="M_glu_L_c" compartment="c" initialAmount="1" hasOnlySubstanceUnits="false" boundaryCondition="false" constant="false"/>
      <species metaid="M_ppi_c" id="M_ppi_c" name="M_ppi_c" compartment="c" initialAmount="1" hasOnlySubstanceUnits="false" boundaryCondition="false" constant="false"/>
      <species metaid="M_pram_c" id="M_pram_c" name="M_pram_c" compartment="c" initialAmount="1" hasOnlySubstanceUnits="false" boundaryCondition="false" constant="false"/>
      <species metaid="M_gly_c" id="M_gly_c" name="M_gly_c" compartment="c" initialAmount="1" hasOnlySubstanceUnits="false" boundaryCondition="false" constant="false"/>
      <species metaid="M_gar_c" id="M_gar_c" name="M_gar_c" compartment="c" initialAmount="1" hasOnlySubstanceUnits="false" boundaryCondition="false" constant="false"/>
      <species metaid="M_10fthf_c" id="M_10fthf_c" name="M_10fthf_c" compartment="c" initialAmount="1" hasOnlySubstanceUnits="false" boundaryCondition="false" constant="false"/>
      <species metaid="M_fgam_c" id="M_fgam_c" name="M_fgam_c" compartment="c" initialAmount="1" hasOnlySubstanceUnits="false" boundaryCondition="false" constant="false"/>
      <species metaid="M_thf_c" id="M_thf_c" name="M_thf_c" compartment="c" initialAmount="1" hasOnlySubstanceUnits="false" boundaryCondition="false" constant="false"/>
      <species metaid="M_fpram_c" id="M_fpram_c" name="M_fpram_c" compartment="c" initialAmount="1" hasOnlySubstanceUnits="false" boundaryCondition="false" constant="false"/>
      <species metaid="M_air_c" id="M_air_c" name="M_air_c" compartment="c" initialAmount="1" hasOnlySubstanceUnits="false" boundaryCondition="false" constant="false"/>
      <species metaid="M_5aizc_c" id="M_5aizc_c" name="M_5aizc_c" compartment="c" initialAmount="1" hasOnlySubstanceUnits="false" boundaryCondition="false" constant="false"/>
      <species metaid="M_asp_L_c" id="M_asp_L_c" name="M_asp_L_c" compartment="c" initialAmount="1" hasOnlySubstanceUnits="false" boundaryCondition="false" constant="false"/>
      <species metaid="M_25aics_c" id="M_25aics_c" name="M_25aics_c" compartment="c" initialAmount="1" hasOnlySubstanceUnits="false" boundaryCondition="false" constant="false"/>
      <species metaid="M_aicar_c" id="M_aicar_c" name="M_aicar_c" compartment="c" initialAmount="1" hasOnlySubstanceUnits="false" boundaryCondition="false" constant="false"/>
      <species metaid="M_fprica_c" id="M_fprica_c" name="M_fprica_c" compartment="c" initialAmount="1" hasOnlySubstanceUnits="false" boundaryCondition="false" constant="false"/>
      <species metaid="M_imp_c" id="M_imp_c" name="M_imp_c" compartment="c" initialAmount="1" hasOnlySubstanceUnits="false" boundaryCondition="false" constant="false"/>
      <species metaid="M_dcamp_c" id="M_dcamp_c" name="M_dcamp_c" compartment="c" initialAmount="1" hasOnlySubstanceUnits="false" boundaryCondition="false" constant="false"/>
      <species metaid="M_xmp_c" id="M_xmp_c" name="M_xmp_c" compartment="c" initialAmount="1" hasOnlySubstanceUnits="false" boundaryCondition="false" constant="false"/>
      <species metaid="M_gmp_c" id="M_gmp_c" name="M_gmp_c" compartment="c" initialAmount="1" hasOnlySubstanceUnits="false" boundaryCondition="false" constant="false"/>
      <species metaid="M_dadp_c" id="M_dadp_c" name="M_dadp_c" compartment="c" initialAmount="1" hasOnlySubstanceUnits="false" boundaryCondition="false" constant="false"/>
      <species metaid="M_datp_c" id="M_datp_c" name="M_datp_c" compartment="c" initialAmount="1" hasOnlySubstanceUnits="false" boundaryCondition="false" constant="false"/>
      <species metaid="M_dgdp_c" id="M_dgdp_c" name="M_dgdp_c" compartment="c" initialAmount="1" hasOnlySubstanceUnits="false" boundaryCondition="false" constant="false"/>
      <species metaid="M_dgtp_c" id="M_dgtp_c" name="M_dgtp_c" compartment="c" initialAmount="1" hasOnlySubstanceUnits="false" boundaryCondition="false" constant="false"/>
      <species metaid="M_5caiz_c" id="M_5caiz_c" name="M_5caiz_c" compartment="c" initialAmount="1" hasOnlySubstanceUnits="false" boundaryCondition="false" constant="false"/>
      <species metaid="M_cdp_c" id="M_cdp_c" name="M_cdp_c" compartment="c" initialAmount="1" hasOnlySubstanceUnits="false" boundaryCondition="false" constant="false"/>
      <species metaid="M_dcdp_c" id="M_dcdp_c" name="M_dcdp_c" compartment="c" initialAmount="1" hasOnlySubstanceUnits="false" boundaryCondition="false" constant="false"/>
      <species metaid="M_udp_c" id="M_udp_c" name="M_udp_c" compartment="c" initialAmount="1" hasOnlySubstanceUnits="false" boundaryCondition="false" constant="false"/>
      <species metaid="M_dudp_c" id="M_dudp_c" name="M_dudp_c" compartment="c" initialAmount="1" hasOnlySubstanceUnits="false" boundaryCondition="false" constant="false"/>
      <species metaid="M_dtdp_c" id="M_dtdp_c" name="M_dtdp_c" compartment="c" initialAmount="1" hasOnlySubstanceUnits="false" boundaryCondition="false" constant="false"/>
      <species metaid="M_dttp_c" id="M_dttp_c" name="M_dttp_c" compartment="c" initialAmount="1" hasOnlySubstanceUnits="false" boundaryCondition="false" constant="false"/>
      <species metaid="M_dtmp_c" id="M_dtmp_c" name="M_dtmp_c" compartment="c" initialAmount="1" hasOnlySubstanceUnits="false" boundaryCondition="false" constant="false"/>
      <species metaid="M_dump_c" id="M_dump_c" name="M_dump_c" compartment="c" initialAmount="1" hasOnlySubstanceUnits="false" boundaryCondition="false" constant="false"/>
      <species metaid="M_mlthf_c" id="M_mlthf_c" name="M_mlthf_c" compartment="c" initialAmount="1" hasOnlySubstanceUnits="false" boundaryCondition="false" constant="false"/>
      <species metaid="M_dhf_c" id="M_dhf_c" name="M_dhf_c" compartment="c" initialAmount="1" hasOnlySubstanceUnits="false" boundaryCondition="false" constant="false"/>
      <species metaid="M_dutp_c" id="M_dutp_c" name="M_dutp_c" compartment="c" initialAmount="1" hasOnlySubstanceUnits="false" boundaryCondition="false" constant="false"/>
      <species metaid="M_dctp_c" id="M_dctp_c" name="M_dctp_c" compartment="c" initialAmount="1" hasOnlySubstanceUnits="false" boundaryCondition="false" constant="false"/>
      <species metaid="M_nh3_c" id="M_nh3_c" name="M_nh3_c" compartment="c" initialAmount="1" hasOnlySubstanceUnits="false" boundaryCondition="false" constant="false"/>
      <species metaid="M_ctp_c" id="M_ctp_c" name="M_ctp_c" compartment="c" initialAmount="1" hasOnlySubstanceUnits="false" boundaryCondition="false" constant="false"/>
      <species metaid="M_orot_c" id="M_orot_c" name="M_orot_c" compartment="c" initialAmount="1" hasOnlySubstanceUnits="false" boundaryCondition="false" constant="false"/>
      <species metaid="M_orot5p_c" id="M_orot5p_c" name="M_orot5p_c" compartment="c" initialAmount="1" hasOnlySubstanceUnits="false" boundaryCondition="false" constant="false"/>
      <species metaid="M_utp_c" id="M_utp_c" name="M_utp_c" compartment="c" initialAmount="1" hasOnlySubstanceUnits="false" boundaryCondition="false" constant="false"/>
      <species metaid="M_ump_c" id="M_ump_c" name="M_ump_c" compartment="c" initialAmount="1" hasOnlySubstanceUnits="false" boundaryCondition="false" constant="false"/>
      <species metaid="M_dhor_S_c" id="M_dhor_S_c" name="M_dhor_S_c" compartment="c" initialAmount="1" hasOnlySubstanceUnits="false" boundaryCondition="false" constant="false"/>
      <species metaid="M_cbasp_c" id="M_cbasp_c" name="M_cbasp_c" compartment="c" initialAmount="1" hasOnlySubstanceUnits="false" boundaryCondition="false" constant="false"/>
      <species metaid="M_cbp_c" id="M_cbp_c" name="M_cbp_c" compartment="c" initialAmount="1" hasOnlySubstanceUnits="false" boundaryCondition="false" constant="false"/>
      <species metaid="M_ins_c" id="M_ins_c" name="M_ins_c" compartment="c" initialAmount="1" hasOnlySubstanceUnits="false" boundaryCondition="false" constant="false"/>
      <species metaid="M_hxan_c" id="M_hxan_c" name="M_hxan_c" compartment="c" initialAmount="1" hasOnlySubstanceUnits="false" boundaryCondition="false" constant="false"/>
      <species metaid="M_adn_c" id="M_adn_c" name="M_adn_c" compartment="c" initialAmount="1" hasOnlySubstanceUnits="false" boundaryCondition="false" constant="false"/>
      <species metaid="M_ade_c" id="M_ade_c" name="M_ade_c" compartment="c" initialAmount="1" hasOnlySubstanceUnits="false" boundaryCondition="false" constant="false"/>
      <species metaid="M_r1p_c" id="M_r1p_c" name="M_r1p_c" compartment="c" initialAmount="1" hasOnlySubstanceUnits="false" boundaryCondition="false" constant="false"/>
      <species metaid="M_gua_c" id="M_gua_c" name="M_gua_c" compartment="c" initialAmount="1" hasOnlySubstanceUnits="false" boundaryCondition="false" constant="false"/>
      <species metaid="M_dgmp_c" id="M_dgmp_c" name="M_dgmp_c" compartment="c" initialAmount="1" hasOnlySubstanceUnits="false" boundaryCondition="false" constant="false"/>
      <species metaid="M_dgsn_c" id="M_dgsn_c" name="M_dgsn_c" compartment="c" initialAmount="1" hasOnlySubstanceUnits="false" boundaryCondition="false" constant="false"/>
      <species metaid="M_gsn_c" id="M_gsn_c" name="M_gsn_c" compartment="c" initialAmount="1" hasOnlySubstanceUnits="false" boundaryCondition="false" constant="false"/>
      <species metaid="M_xtsn_c" id="M_xtsn_c" name="M_xtsn_c" compartment="c" initialAmount="1" hasOnlySubstanceUnits="false" boundaryCondition="false" constant="false"/>
      <species metaid="M_xan_c" id="M_xan_c" name="M_xan_c" compartment="c" initialAmount="1" hasOnlySubstanceUnits="false" boundaryCondition="false" constant="false"/>
      <species metaid="M_cytd_c" id="M_cytd_c" name="M_cytd_c" compartment="c" initialAmount="1" hasOnlySubstanceUnits="false" boundaryCondition="false" constant="false"/>
      <species metaid="M_uri_c" id="M_uri_c" name="M_uri_c" compartment="c" initialAmount="1" hasOnlySubstanceUnits="false" boundaryCondition="false" constant="false"/>
      <species metaid="M_ura_c" id="M_ura_c" name="M_ura_c" compartment="c" initialAmount="1" hasOnlySubstanceUnits="false" boundaryCondition="false" constant="false"/>
      <species metaid="M_thymd_c" id="M_thymd_c" name="M_thymd_c" compartment="c" initialAmount="1" hasOnlySubstanceUnits="false" boundaryCondition="false" constant="false"/>
      <species metaid="M_val_L_c" id="M_val_L_c" name="M_val_L_c" compartment="c" initialAmount="1" hasOnlySubstanceUnits="false" boundaryCondition="false" constant="false"/>
      <species metaid="M_3mob_c" id="M_3mob_c" name="M_3mob_c" compartment="c" initialAmount="1" hasOnlySubstanceUnits="false" boundaryCondition="false" constant="false"/>
      <species metaid="M_ala_L_c" id="M_ala_L_c" name="M_ala_L_c" compartment="c" initialAmount="1" hasOnlySubstanceUnits="false" boundaryCondition="false" constant="false"/>
      <species metaid="M_ala_D_c" id="M_ala_D_c" name="M_ala_D_c" compartment="c" initialAmount="1" hasOnlySubstanceUnits="false" boundaryCondition="false" constant="false"/>
      <species metaid="M_alac_S_c" id="M_alac_S_c" name="M_alac_S_c" compartment="c" initialAmount="1" hasOnlySubstanceUnits="false" boundaryCondition="false" constant="false"/>
      <species metaid="M_23dhmb_c" id="M_23dhmb_c" name="M_23dhmb_c" compartment="c" initialAmount="1" hasOnlySubstanceUnits="false" boundaryCondition="false" constant="false"/>
      <species metaid="M_4pasp_c" id="M_4pasp_c" name="M_4pasp_c" compartment="c" initialAmount="1" hasOnlySubstanceUnits="false" boundaryCondition="false" constant="false"/>
      <species metaid="M_aspsa_c" id="M_aspsa_c" name="M_aspsa_c" compartment="c" initialAmount="1" hasOnlySubstanceUnits="false" boundaryCondition="false" constant="false"/>
      <species metaid="M_23dhdp_c" id="M_23dhdp_c" name="M_23dhdp_c" compartment="c" initialAmount="1" hasOnlySubstanceUnits="false" boundaryCondition="false" constant="false"/>
      <species metaid="M_thdp_c" id="M_thdp_c" name="M_thdp_c" compartment="c" initialAmount="1" hasOnlySubstanceUnits="false" boundaryCondition="false" constant="false"/>
      <species metaid="M_sl2a6o_c" id="M_sl2a6o_c" name="M_sl2a6o_c" compartment="c" initialAmount="1" hasOnlySubstanceUnits="false" boundaryCondition="false" constant="false"/>
      <species metaid="M_sl26da_c" id="M_sl26da_c" name="M_sl26da_c" compartment="c" initialAmount="1" hasOnlySubstanceUnits="false" boundaryCondition="false" constant="false"/>
      <species metaid="M_26dap_LL_c" id="M_26dap_LL_c" name="M_26dap_LL_c" compartment="c" initialAmount="1" hasOnlySubstanceUnits="false" boundaryCondition="false" constant="false"/>
      <species metaid="M_26dap_M_c" id="M_26dap_M_c" name="M_26dap_M_c" compartment="c" initialAmount="1" hasOnlySubstanceUnits="false" boundaryCondition="false" constant="false"/>
      <species metaid="M_lys_L_c" id="M_lys_L_c" name="M_lys_L_c" compartment="c" initialAmount="1" hasOnlySubstanceUnits="false" boundaryCondition="false" constant="false"/>
      <species metaid="M_acglu_c" id="M_acglu_c" name="M_acglu_c" compartment="c" initialAmount="1" hasOnlySubstanceUnits="false" boundaryCondition="false" constant="false"/>
      <species metaid="M_acorn_c" id="M_acorn_c" name="M_acorn_c" compartment="c" initialAmount="1" hasOnlySubstanceUnits="false" boundaryCondition="false" constant="false"/>
      <species metaid="M_orn_c" id="M_orn_c" name="M_orn_c" compartment="c" initialAmount="1" hasOnlySubstanceUnits="false" boundaryCondition="false" constant="false"/>
      <species metaid="M_acg5p_c" id="M_acg5p_c" name="M_acg5p_c" compartment="c" initialAmount="1" hasOnlySubstanceUnits="false" boundaryCondition="false" constant="false"/>
      <species metaid="M_acg5sa_c" id="M_acg5sa_c" name="M_acg5sa_c" compartment="c" initialAmount="1" hasOnlySubstanceUnits="false" boundaryCondition="false" constant="false"/>
      <species metaid="M_citr_L_c" id="M_citr_L_c" name="M_citr_L_c" compartment="c" initialAmount="1" hasOnlySubstanceUnits="false" boundaryCondition="false" constant="false"/>
      <species metaid="M_argsuc_c" id="M_argsuc_c" name="M_argsuc_c" compartment="c" initialAmount="1" hasOnlySubstanceUnits="false" boundaryCondition="false" constant="false"/>
      <species metaid="M_arg_L_c" id="M_arg_L_c" name="M_arg_L_c" compartment="c" initialAmount="1" hasOnlySubstanceUnits="false" boundaryCondition="false" constant="false"/>
      <species metaid="M_asn_L_c" id="M_asn_L_c" name="M_asn_L_c" compartment="c" initialAmount="1" hasOnlySubstanceUnits="false" boundaryCondition="false" constant="false"/>
      <species metaid="M_hom_L_c" id="M_hom_L_c" name="M_hom_L_c" compartment="c" initialAmount="1" hasOnlySubstanceUnits="false" boundaryCondition="false" constant="false"/>
      <species metaid="M_phom_c" id="M_phom_c" name="M_phom_c" compartment="c" initialAmount="1" hasOnlySubstanceUnits="false" boundaryCondition="false" constant="false"/>
      <species metaid="M_thr_L_c" id="M_thr_L_c" name="M_thr_L_c" compartment="c" initialAmount="1" hasOnlySubstanceUnits="false" boundaryCondition="false" constant="false"/>
      <species metaid="M_2obut_c" id="M_2obut_c" name="M_2obut_c" compartment="c" initialAmount="1" hasOnlySubstanceUnits="false" boundaryCondition="false" constant="false"/>
      <species metaid="M_2ahbut_c" id="M_2ahbut_c" name="M_2ahbut_c" compartment="c" initialAmount="1" hasOnlySubstanceUnits="false" boundaryCondition="false" constant="false"/>
      <species metaid="M_23dhmp_c" id="M_23dhmp_c" name="M_23dhmp_c" compartment="c" initialAmount="1" hasOnlySubstanceUnits="false" boundaryCondition="false" constant="false"/>
      <species metaid="M_3mop_c" id="M_3mop_c" name="M_3mop_c" compartment="c" initialAmount="1" hasOnlySubstanceUnits="false" boundaryCondition="false" constant="false"/>
      <species metaid="M_ile_L_c" id="M_ile_L_c" name="M_ile_L_c" compartment="c" initialAmount="1" hasOnlySubstanceUnits="false" boundaryCondition="false" constant="false"/>
      <species metaid="M_3c3hmp_c" id="M_3c3hmp_c" name="M_3c3hmp_c" compartment="c" initialAmount="1" hasOnlySubstanceUnits="false" boundaryCondition="false" constant="false"/>
      <species metaid="M_2ippm_c" id="M_2ippm_c" name="M_2ippm_c" compartment="c" initialAmount="1" hasOnlySubstanceUnits="false" boundaryCondition="false" constant="false"/>
      <species metaid="M_3c2hmp_c" id="M_3c2hmp_c" name="M_3c2hmp_c" compartment="c" initialAmount="1" hasOnlySubstanceUnits="false" boundaryCondition="false" constant="false"/>
      <species metaid="M_4mop_c" id="M_4mop_c" name="M_4mop_c" compartment="c" initialAmount="1" hasOnlySubstanceUnits="false" boundaryCondition="false" constant="false"/>
      <species metaid="M_leu_L_c" id="M_leu_L_c" name="M_leu_L_c" compartment="c" initialAmount="1" hasOnlySubstanceUnits="false" boundaryCondition="false" constant="false"/>
      <species metaid="M_3c4mop_c" id="M_3c4mop_c" name="M_3c4mop_c" compartment="c" initialAmount="1" hasOnlySubstanceUnits="false" boundaryCondition="false" constant="false"/>
      <species metaid="M_glu5p_c" id="M_glu5p_c" name="M_glu5p_c" compartment="c" initialAmount="1" hasOnlySubstanceUnits="false" boundaryCondition="false" constant="false"/>
      <species metaid="M_glu5sa_c" id="M_glu5sa_c" name="M_glu5sa_c" compartment="c" initialAmount="1" hasOnlySubstanceUnits="false" boundaryCondition="false" constant="false"/>
      <species metaid="M_3php_c" id="M_3php_c" name="M_3php_c" compartment="c" initialAmount="1" hasOnlySubstanceUnits="false" boundaryCondition="false" constant="false"/>
      <species metaid="M_pser_L_c" id="M_pser_L_c" name="M_pser_L_c" compartment="c" initialAmount="1" hasOnlySubstanceUnits="false" boundaryCondition="false" constant="false"/>
      <species metaid="M_chor_c" id="M_chor_c" name="M_chor_c" compartment="c" initialAmount="1" hasOnlySubstanceUnits="false" boundaryCondition="false" constant="false"/>
      <species metaid="M_pphn_c" id="M_pphn_c" name="M_pphn_c" compartment="c" initialAmount="1" hasOnlySubstanceUnits="false" boundaryCondition="false" constant="false"/>
      <species metaid="M_34hpp_c" id="M_34hpp_c" name="M_34hpp_c" compartment="c" initialAmount="1" hasOnlySubstanceUnits="false" boundaryCondition="false" constant="false"/>
      <species metaid="M_tyr_L_c" id="M_tyr_L_c" name="M_tyr_L_c" compartment="c" initialAmount="1" hasOnlySubstanceUnits="false" boundaryCondition="false" constant="false"/>
      <species metaid="M_3ig3p_c" id="M_3ig3p_c" name="M_3ig3p_c" compartment="c" initialAmount="1" hasOnlySubstanceUnits="false" boundaryCondition="false" constant="false"/>
      <species metaid="M_trp_L_c" id="M_trp_L_c" name="M_trp_L_c" compartment="c" initialAmount="1" hasOnlySubstanceUnits="false" boundaryCondition="false" constant="false"/>
      <species metaid="M_anth_c" id="M_anth_c" name="M_anth_c" compartment="c" initialAmount="1" hasOnlySubstanceUnits="false" boundaryCondition="false" constant="false"/>
      <species metaid="M_pran_c" id="M_pran_c" name="M_pran_c" compartment="c" initialAmount="1" hasOnlySubstanceUnits="false" boundaryCondition="false" constant="false"/>
      <species metaid="M_2cpr5p_c" id="M_2cpr5p_c" name="M_2cpr5p_c" compartment="c" initialAmount="1" hasOnlySubstanceUnits="false" boundaryCondition="false" constant="false"/>
      <species metaid="M_acser_c" id="M_acser_c" name="M_acser_c" compartment="c" initialAmount="1" hasOnlySubstanceUnits="false" boundaryCondition="false" constant="false"/>
      <species metaid="M_cys_L_c" id="M_cys_L_c" name="M_cys_L_c" compartment="c" initialAmount="1" hasOnlySubstanceUnits="false" boundaryCondition="false" constant="false"/>
      <species metaid="M_phpyr_c" id="M_phpyr_c" name="M_phpyr_c" compartment="c" initialAmount="1" hasOnlySubstanceUnits="false" boundaryCondition="false" constant="false"/>
      <species metaid="M_phe_L_c" id="M_phe_L_c" name="M_phe_L_c" compartment="c" initialAmount="1" hasOnlySubstanceUnits="false" boundaryCondition="false" constant="false"/>
      <species metaid="M_5mthf_c" id="M_5mthf_c" name="M_5mthf_c" compartment="c" initialAmount="1" hasOnlySubstanceUnits="false" boundaryCondition="false" constant="false"/>
      <species metaid="M_hcys_L_c" id="M_hcys_L_c" name="M_hcys_L_c" compartment="c" initialAmount="1" hasOnlySubstanceUnits="false" boundaryCondition="false" constant="false"/>
      <species metaid="M_met_L_c" id="M_met_L_c" name="M_met_L_c" compartment="c" initialAmount="1" hasOnlySubstanceUnits="false" boundaryCondition="false" constant="false"/>
      <species metaid="M_cyst_L_c" id="M_cyst_L_c" name="M_cyst_L_c" compartment="c" initialAmount="1" hasOnlySubstanceUnits="false" boundaryCondition="false" constant="false"/>
      <species metaid="M_achms_c" id="M_achms_c" name="M_achms_c" compartment="c" initialAmount="1" hasOnlySubstanceUnits="false" boundaryCondition="false" constant="false"/>
      <species metaid="M_ahcys_c" id="M_ahcys_c" name="M_ahcys_c" compartment="c" initialAmount="1" hasOnlySubstanceUnits="false" boundaryCondition="false" constant="false"/>
      <species metaid="M_amet_c" id="M_amet_c" name="M_amet_c" compartment="c" initialAmount="1" hasOnlySubstanceUnits="false" boundaryCondition="false" constant="false"/>
      <species metaid="M_prbatp_c" id="M_prbatp_c" name="M_prbatp_c" compartment="c" initialAmount="1" hasOnlySubstanceUnits="false" boundaryCondition="false" constant="false"/>
      <species metaid="M_prbamp_c" id="M_prbamp_c" name="M_prbamp_c" compartment="c" initialAmount="1" hasOnlySubstanceUnits="false" boundaryCondition="false" constant="false"/>
      <species metaid="M_prfp_c" id="M_prfp_c" name="M_prfp_c" compartment="c" initialAmount="1" hasOnlySubstanceUnits="false" boundaryCondition="false" constant="false"/>
      <species metaid="M_prlp_c" id="M_prlp_c" name="M_prlp_c" compartment="c" initialAmount="1" hasOnlySubstanceUnits="false" boundaryCondition="false" constant="false"/>
      <species metaid="M_eig3p_c" id="M_eig3p_c" name="M_eig3p_c" compartment="c" initialAmount="1" hasOnlySubstanceUnits="false" boundaryCondition="false" constant="false"/>
      <species metaid="M_imacp_c" id="M_imacp_c" name="M_imacp_c" compartment="c" initialAmount="1" hasOnlySubstanceUnits="false" boundaryCondition="false" constant="false"/>
      <species metaid="M_hisp_c" id="M_hisp_c" name="M_hisp_c" compartment="c" initialAmount="1" hasOnlySubstanceUnits="false" boundaryCondition="false" constant="false"/>
      <species metaid="M_histd_c" id="M_histd_c" name="M_histd_c" compartment="c" initialAmount="1" hasOnlySubstanceUnits="false" boundaryCondition="false" constant="false"/>
      <species metaid="M_his_L_c" id="M_his_L_c" name="M_his_L_c" compartment="c" initialAmount="1" hasOnlySubstanceUnits="false" boundaryCondition="false" constant="false"/>
      <species metaid="M_man6p_c" id="M_man6p_c" name="M_man6p_c" compartment="c" initialAmount="1" hasOnlySubstanceUnits="false" boundaryCondition="false" constant="false"/>
      <species metaid="M_man1p_c" id="M_man1p_c" name="M_man1p_c" compartment="c" initialAmount="1" hasOnlySubstanceUnits="false" boundaryCondition="false" constant="false"/>
      <species metaid="M_gdpman_c" id="M_gdpman_c" name="M_gdpman_c" compartment="c" initialAmount="1" hasOnlySubstanceUnits="false" boundaryCondition="false" constant="false"/>
      <species metaid="M_glyc_c" id="M_glyc_c" name="M_glyc_c" compartment="c" initialAmount="1" hasOnlySubstanceUnits="false" boundaryCondition="false" constant="false"/>
      <species metaid="M_acgam1p_c" id="M_acgam1p_c" name="M_acgam1p_c" compartment="c" initialAmount="1" hasOnlySubstanceUnits="false" boundaryCondition="false" constant="false"/>
      <species metaid="M_uacgam_c" id="M_uacgam_c" name="M_uacgam_c" compartment="c" initialAmount="1" hasOnlySubstanceUnits="false" boundaryCondition="false" constant="false"/>
      <species metaid="M_gam6p_c" id="M_gam6p_c" name="M_gam6p_c" compartment="c" initialAmount="1" hasOnlySubstanceUnits="false" boundaryCondition="false" constant="false"/>
      <species metaid="M_gam1p_c" id="M_gam1p_c" name="M_gam1p_c" compartment="c" initialAmount="1" hasOnlySubstanceUnits="false" boundaryCondition="false" constant="false"/>
      <species metaid="M_g1p_c" id="M_g1p_c" name="M_g1p_c" compartment="c" initialAmount="1" hasOnlySubstanceUnits="false" boundaryCondition="false" constant="false"/>
      <species metaid="M_udpg_c" id="M_udpg_c" name="M_udpg_c" compartment="c" initialAmount="1" hasOnlySubstanceUnits="false" boundaryCondition="false" constant="false"/>
      <species metaid="M_ALAALA_c" id="M_ALAALA_c" name="M_ALAALA_c" compartment="c" initialAmount="1" hasOnlySubstanceUnits="false" boundaryCondition="false" constant="false"/>
      <species metaid="M_glu_D_c" id="M_glu_D_c" name="M_glu_D_c" compartment="c" initialAmount="1" hasOnlySubstanceUnits="false" boundaryCondition="false" constant="false"/>
      <species metaid="M_uaccg_c" id="M_uaccg_c" name="M_uaccg_c" compartment="c" initialAmount="1" hasOnlySubstanceUnits="false" boundaryCondition="false" constant="false"/>
      <species metaid="M_uamr_c" id="M_uamr_c" name="M_uamr_c" compartment="c" initialAmount="1" hasOnlySubstanceUnits="false" boundaryCondition="false" constant="false"/>
      <species metaid="M_pnto_R_c" id="M_pnto_R_c" name="M_pnto_R_c" compartment="c" initialAmount="1" hasOnlySubstanceUnits="false" boundaryCondition="false" constant="false"/>
      <species metaid="M_4ppan_c" id="M_4ppan_c" name="M_4ppan_c" compartment="c" initialAmount="1" hasOnlySubstanceUnits="false" boundaryCondition="false" constant="false"/>
      <species metaid="M_4ppcys_c" id="M_4ppcys_c" name="M_4ppcys_c" compartment="c" initialAmount="1" hasOnlySubstanceUnits="false" boundaryCondition="false" constant="false"/>
      <species metaid="M_pan4p_c" id="M_pan4p_c" name="M_pan4p_c" compartment="c" initialAmount="1" hasOnlySubstanceUnits="false" boundaryCondition="false" constant="false"/>
      <species metaid="M_dpcoa_c" id="M_dpcoa_c" name="M_dpcoa_c" compartment="c" initialAmount="1" hasOnlySubstanceUnits="false" boundaryCondition="false" constant="false"/>
      <species metaid="M_methf_c" id="M_methf_c" name="M_methf_c" compartment="c" initialAmount="1" hasOnlySubstanceUnits="false" boundaryCondition="false" constant="false"/>
      <species metaid="M_dnad_c" id="M_dnad_c" name="M_dnad_c" compartment="c" initialAmount="1" hasOnlySubstanceUnits="false" boundaryCondition="false" constant="false"/>
      <species metaid="M_nicrnt_c" id="M_nicrnt_c" name="M_nicrnt_c" compartment="c" initialAmount="1" hasOnlySubstanceUnits="false" boundaryCondition="false" constant="false"/>
      <species metaid="M_ncam_c" id="M_ncam_c" name="M_ncam_c" compartment="c" initialAmount="1" hasOnlySubstanceUnits="false" boundaryCondition="false" constant="false"/>
      <species metaid="M_nac_c" id="M_nac_c" name="M_nac_c" compartment="c" initialAmount="1" hasOnlySubstanceUnits="false" boundaryCondition="false" constant="false"/>
      <species metaid="M_2dhp_c" id="M_2dhp_c" name="M_2dhp_c" compartment="c" initialAmount="1" hasOnlySubstanceUnits="false" boundaryCondition="false" constant="false"/>
      <species metaid="M_pant_R_c" id="M_pant_R_c" name="M_pant_R_c" compartment="c" initialAmount="1" hasOnlySubstanceUnits="false" boundaryCondition="false" constant="false"/>
      <species metaid="M_ala_B_c" id="M_ala_B_c" name="M_ala_B_c" compartment="c" initialAmount="1" hasOnlySubstanceUnits="false" boundaryCondition="false" constant="false"/>
      <species metaid="M_25drapp_c" id="M_25drapp_c" name="M_25drapp_c" compartment="c" initialAmount="1" hasOnlySubstanceUnits="false" boundaryCondition="false" constant="false"/>
      <species metaid="M_5apru_c" id="M_5apru_c" name="M_5apru_c" compartment="c" initialAmount="1" hasOnlySubstanceUnits="false" boundaryCondition="false" constant="false"/>
      <species metaid="M_5aprbu_c" id="M_5aprbu_c" name="M_5aprbu_c" compartment="c" initialAmount="1" hasOnlySubstanceUnits="false" boundaryCondition="false" constant="false"/>
      <species metaid="M_db4p_c" id="M_db4p_c" name="M_db4p_c" compartment="c" initialAmount="1" hasOnlySubstanceUnits="false" boundaryCondition="false" constant="false"/>
      <species metaid="M_4r5au_c" id="M_4r5au_c" name="M_4r5au_c" compartment="c" initialAmount="1" hasOnlySubstanceUnits="false" boundaryCondition="false" constant="false"/>
      <species metaid="M_dmlz_c" id="M_dmlz_c" name="M_dmlz_c" compartment="c" initialAmount="1" hasOnlySubstanceUnits="false" boundaryCondition="false" constant="false"/>
      <species metaid="M_ribflv_c" id="M_ribflv_c" name="M_ribflv_c" compartment="c" initialAmount="1" hasOnlySubstanceUnits="false" boundaryCondition="false" constant="false"/>
      <species metaid="M_fmn_c" id="M_fmn_c" name="M_fmn_c" compartment="c" initialAmount="1" hasOnlySubstanceUnits="false" boundaryCondition="false" constant="false"/>
      <species metaid="M_fad_c" id="M_fad_c" name="M_fad_c" compartment="c" initialAmount="1" hasOnlySubstanceUnits="false" boundaryCondition="false" constant="false"/>
      <species metaid="M_ahdt_c" id="M_ahdt_c" name="M_ahdt_c" compartment="c" initialAmount="1" hasOnlySubstanceUnits="false" boundaryCondition="false" constant="false"/>
      <species metaid="M_dhpmp_c" id="M_dhpmp_c" name="M_dhpmp_c" compartment="c" initialAmount="1" hasOnlySubstanceUnits="false" boundaryCondition="false" constant="false"/>
      <species metaid="M_dhnpt_c" id="M_dhnpt_c" name="M_dhnpt_c" compartment="c" initialAmount="1" hasOnlySubstanceUnits="false" boundaryCondition="false" constant="false"/>
      <species metaid="M_6hmhpt_c" id="M_6hmhpt_c" name="M_6hmhpt_c" compartment="c" initialAmount="1" hasOnlySubstanceUnits="false" boundaryCondition="false" constant="false"/>
      <species metaid="M_4adcho_c" id="M_4adcho_c" name="M_4adcho_c" compartment="c" initialAmount="1" hasOnlySubstanceUnits="false" boundaryCondition="false" constant="false"/>
      <species metaid="M_4abz_c" id="M_4abz_c" name="M_4abz_c" compartment="c" initialAmount="1" hasOnlySubstanceUnits="false" boundaryCondition="false" constant="false"/>
      <species metaid="M_6hmhptpp_c" id="M_6hmhptpp_c" name="M_6hmhptpp_c" compartment="c" initialAmount="1" hasOnlySubstanceUnits="false" boundaryCondition="false" constant="false"/>
      <species metaid="M_dhpt_c" id="M_dhpt_c" name="M_dhpt_c" compartment="c" initialAmount="1" hasOnlySubstanceUnits="false" boundaryCondition="false" constant="false"/>
      <species metaid="M_2dda7p_c" id="M_2dda7p_c" name="M_2dda7p_c" compartment="c" initialAmount="1" hasOnlySubstanceUnits="false" boundaryCondition="false" constant="false"/>
      <species metaid="M_3dhq_c" id="M_3dhq_c" name="M_3dhq_c" compartment="c" initialAmount="1" hasOnlySubstanceUnits="false" boundaryCondition="false" constant="false"/>
      <species metaid="M_3dhsk_c" id="M_3dhsk_c" name="M_3dhsk_c" compartment="c" initialAmount="1" hasOnlySubstanceUnits="false" boundaryCondition="false" constant="false"/>
      <species metaid="M_skm_c" id="M_skm_c" name="M_skm_c" compartment="c" initialAmount="1" hasOnlySubstanceUnits="false" boundaryCondition="false" constant="false"/>
      <species metaid="M_skm5p_c" id="M_skm5p_c" name="M_skm5p_c" compartment="c" initialAmount="1" hasOnlySubstanceUnits="false" boundaryCondition="false" constant="false"/>
      <species metaid="M_3psme_c" id="M_3psme_c" name="M_3psme_c" compartment="c" initialAmount="1" hasOnlySubstanceUnits="false" boundaryCondition="false" constant="false"/>
      <species metaid="M_tre6p_c" id="M_tre6p_c" name="M_tre6p_c" compartment="c" initialAmount="1" hasOnlySubstanceUnits="false" boundaryCondition="false" constant="false"/>
      <species metaid="M_tre_c" id="M_tre_c" name="M_tre_c" compartment="c" initialAmount="1" hasOnlySubstanceUnits="false" boundaryCondition="false" constant="false"/>
      <species metaid="M_adpglc_c" id="M_adpglc_c" name="M_adpglc_c" compartment="c" initialAmount="1" hasOnlySubstanceUnits="false" boundaryCondition="false" constant="false"/>
      <species metaid="M_glycogen_c" id="M_glycogen_c" name="M_glycogen_c" compartment="c" initialAmount="1" hasOnlySubstanceUnits="false" boundaryCondition="false" constant="false"/>
      <species metaid="M_suc6p_c" id="M_suc6p_c" name="M_suc6p_c" compartment="c" initialAmount="1" hasOnlySubstanceUnits="false" boundaryCondition="false" constant="false"/>
      <species metaid="M_fru_c" id="M_fru_c" name="M_fru_c" compartment="c" initialAmount="1" hasOnlySubstanceUnits="false" boundaryCondition="false" constant="false"/>
      <species metaid="M_f1p_c" id="M_f1p_c" name="M_f1p_c" compartment="c" initialAmount="1" hasOnlySubstanceUnits="false" boundaryCondition="false" constant="false"/>
      <species metaid="M_glc_D_e" id="M_glc_D_e" name="M_glc_D_e" compartment="e" initialAmount="1" hasOnlySubstanceUnits="false" boundaryCondition="false" constant="false"/>
      <species metaid="M_ac_e" id="M_ac_e" name="M_ac_e" compartment="e" initialAmount="1" hasOnlySubstanceUnits="false" boundaryCondition="false" constant="false"/>
      <species metaid="M_co2_e" id="M_co2_e" name="M_co2_e" compartment="e" initialAmount="1" hasOnlySubstanceUnits="false" boundaryCondition="false" constant="false"/>
      <species metaid="M_o2_e" id="M_o2_e" name="M_o2_e" compartment="e" initialAmount="1" hasOnlySubstanceUnits="false" boundaryCondition="false" constant="false"/>
      <species metaid="M_h2o_e" id="M_h2o_e" name="M_h2o_e" compartment="e" initialAmount="1" hasOnlySubstanceUnits="false" boundaryCondition="false" constant="false"/>
      <species metaid="M_lac_L_e" id="M_lac_L_e" name="M_lac_L_e" compartment="e" initialAmount="1" hasOnlySubstanceUnits="false" boundaryCondition="false" constant="false"/>
      <species metaid="M_so3_e" id="M_so3_e" name="M_so3_e" compartment="e" initialAmount="1" hasOnlySubstanceUnits="false" boundaryCondition="false" constant="false"/>
      <species metaid="M_suc_e" id="M_suc_e" name="M_suc_e" compartment="e" initialAmount="1" hasOnlySubstanceUnits="false" boundaryCondition="false" constant="false"/>
      <species metaid="M_glu_L_e" id="M_glu_L_e" name="M_glu_L_e" compartment="e" initialAmount="1" hasOnlySubstanceUnits="false" boundaryCondition="false" constant="false"/>
      <species metaid="M_nh3_e" id="M_nh3_e" name="M_nh3_e" compartment="e" initialAmount="1" hasOnlySubstanceUnits="false" boundaryCondition="false" constant="false"/>
      <species metaid="M_pi_e" id="M_pi_e" name="M_pi_e" compartment="e" initialAmount="1" hasOnlySubstanceUnits="false" boundaryCondition="false" constant="false"/>
      <species metaid="M_gln_L_e" id="M_gln_L_e" name="M_gln_L_e" compartment="e" initialAmount="1" hasOnlySubstanceUnits="false" boundaryCondition="false" constant="false"/>
      <species metaid="M_na_c" id="M_na_c" name="M_na_c" compartment="c" initialAmount="1" hasOnlySubstanceUnits="false" boundaryCondition="false" constant="false"/>
      <species metaid="M_na_e" id="M_na_e" name="M_na_e" compartment="e" initialAmount="1" hasOnlySubstanceUnits="false" boundaryCondition="false" constant="false"/>
      <species metaid="M_ala_L_e" id="M_ala_L_e" name="M_ala_L_e" compartment="e" initialAmount="1" hasOnlySubstanceUnits="false" boundaryCondition="false" constant="false"/>
      <species metaid="M_val_L_e" id="M_val_L_e" name="M_val_L_e" compartment="e" initialAmount="1" hasOnlySubstanceUnits="false" boundaryCondition="false" constant="false"/>
      <species metaid="M_lys_L_e" id="M_lys_L_e" name="M_lys_L_e" compartment="e" initialAmount="1" hasOnlySubstanceUnits="false" boundaryCondition="false" constant="false"/>
      <species metaid="M_cit_e" id="M_cit_e" name="M_cit_e" compartment="e" initialAmount="1" hasOnlySubstanceUnits="false" boundaryCondition="false" constant="false"/>
      <species metaid="M_leu_L_e" id="M_leu_L_e" name="M_leu_L_e" compartment="e" initialAmount="1" hasOnlySubstanceUnits="false" boundaryCondition="false" constant="false"/>
      <species metaid="M_tyr_L_e" id="M_tyr_L_e" name="M_tyr_L_e" compartment="e" initialAmount="1" hasOnlySubstanceUnits="false" boundaryCondition="false" constant="false"/>
      <species metaid="M_trp_L_e" id="M_trp_L_e" name="M_trp_L_e" compartment="e" initialAmount="1" hasOnlySubstanceUnits="false" boundaryCondition="false" constant="false"/>
      <species metaid="M_pro_L_e" id="M_pro_L_e" name="M_pro_L_e" compartment="e" initialAmount="1" hasOnlySubstanceUnits="false" boundaryCondition="false" constant="false"/>
      <species metaid="M_ile_L_e" id="M_ile_L_e" name="M_ile_L_e" compartment="e" initialAmount="1" hasOnlySubstanceUnits="false" boundaryCondition="false" constant="false"/>
      <species metaid="M_met_L_e" id="M_met_L_e" name="M_met_L_e" compartment="e" initialAmount="1" hasOnlySubstanceUnits="false" boundaryCondition="false" constant="false"/>
      <species metaid="M_ser_L_e" id="M_ser_L_e" name="M_ser_L_e" compartment="e" initialAmount="1" hasOnlySubstanceUnits="false" boundaryCondition="false" constant="false"/>
      <species metaid="M_thr_L_e" id="M_thr_L_e" name="M_thr_L_e" compartment="e" initialAmount="1" hasOnlySubstanceUnits="false" boundaryCondition="false" constant="false"/>
      <species metaid="M_arg_L_e" id="M_arg_L_e" name="M_arg_L_e" compartment="e" initialAmount="1" hasOnlySubstanceUnits="false" boundaryCondition="false" constant="false"/>
      <species metaid="M_PROTEIN_c" id="M_PROTEIN_c" name="M_PROTEIN_c" compartment="c" initialAmount="1" hasOnlySubstanceUnits="false" boundaryCondition="false" constant="false"/>
      <species metaid="M_DNA_c" id="M_DNA_c" name="M_DNA_c" compartment="c" initialAmount="1" hasOnlySubstanceUnits="false" boundaryCondition="false" constant="false"/>
      <species metaid="M_RNA_c" id="M_RNA_c" name="M_RNA_c" compartment="c" initialAmount="1" hasOnlySubstanceUnits="false" boundaryCondition="false" constant="false"/>
      <species metaid="M_PHOSPHOLIPID_c" id="M_PHOSPHOLIPID_c" name="M_PHOSPHOLIPID_c" compartment="c" initialAmount="1" hasOnlySubstanceUnits="false" boundaryCondition="false" constant="false"/>
      <species metaid="M_PEPTIDOGLYCAN_c" id="M_PEPTIDOGLYCAN_c" name="M_PEPTIDOGLYCAN_c" compartment="c" initialAmount="1" hasOnlySubstanceUnits="false" boundaryCondition="false" constant="false"/>
      <species metaid="M_ARABINOGALACTAN_c" id="M_ARABINOGALACTAN_c" name="M_ARABINOGALACTAN_c" compartment="c" initialAmount="1" hasOnlySubstanceUnits="false" boundaryCondition="false" constant="false"/>
      <species metaid="M_MYCOLICACID_c" id="M_MYCOLICACID_c" name="M_MYCOLICACID_c" compartment="c" initialAmount="1" hasOnlySubstanceUnits="false" boundaryCondition="false" constant="false"/>
      <species metaid="M_damp_c" id="M_damp_c" name="M_damp_c" compartment="c" initialAmount="1" hasOnlySubstanceUnits="false" boundaryCondition="false" constant="false"/>
      <species metaid="M_dcmp_c" id="M_dcmp_c" name="M_dcmp_c" compartment="c" initialAmount="1" hasOnlySubstanceUnits="false" boundaryCondition="false" constant="false"/>
      <species metaid="M_udpgal_c" id="M_udpgal_c" name="M_udpgal_c" compartment="c" initialAmount="1" hasOnlySubstanceUnits="false" boundaryCondition="false" constant="false"/>
      <species metaid="M_udpara_c" id="M_udpara_c" name="M_udpara_c" compartment="c" initialAmount="1" hasOnlySubstanceUnits="false" boundaryCondition="false" constant="false"/>
      <species metaid="M_FREEMYCOLICACID_c" id="M_FREEMYCOLICACID_c" name="M_FREEMYCOLICACID_c" compartment="c" initialAmount="1" hasOnlySubstanceUnits="false" boundaryCondition="false" constant="false"/>
      <species metaid="M_TMCM_c" id="M_TMCM_c" name="M_TMCM_c" compartment="c" initialAmount="1" hasOnlySubstanceUnits="false" boundaryCondition="false" constant="false"/>
      <species metaid="M_TDCM_c" id="M_TDCM_c" name="M_TDCM_c" compartment="c" initialAmount="1" hasOnlySubstanceUnits="false" boundaryCondition="false" constant="false"/>
      <species metaid="M_PIT_c" id="M_PIT_c" name="M_PIT_c" compartment="c" initialAmount="1" hasOnlySubstanceUnits="false" boundaryCondition="false" constant="false"/>
      <species metaid="M_PIM_c" id="M_PIM_c" name="M_PIM_c" compartment="c" initialAmount="1" hasOnlySubstanceUnits="false" boundaryCondition="false" constant="false"/>
      <species metaid="M_lac_D_c" id="M_lac_D_c" name="M_lac_D_c" compartment="c" initialAmount="1" hasOnlySubstanceUnits="false" boundaryCondition="false" constant="false"/>
      <species metaid="M_h2o2_c" id="M_h2o2_c" name="M_h2o2_c" compartment="c" initialAmount="1" hasOnlySubstanceUnits="false" boundaryCondition="false" constant="false"/>
      <species metaid="M_malts_c" id="M_malts_c" name="M_malts_c" compartment="c" initialAmount="1" hasOnlySubstanceUnits="false" boundaryCondition="false" constant="false"/>
      <species metaid="M_fadh2_c" id="M_fadh2_c" name="M_fadh2_c" compartment="c" initialAmount="1" hasOnlySubstanceUnits="false" boundaryCondition="false" constant="false"/>
      <species metaid="M_duri_c" id="M_duri_c" name="M_duri_c" compartment="c" initialAmount="1" hasOnlySubstanceUnits="false" boundaryCondition="false" constant="false"/>
      <species metaid="M_dcyt_c" id="M_dcyt_c" name="M_dcyt_c" compartment="c" initialAmount="1" hasOnlySubstanceUnits="false" boundaryCondition="false" constant="false"/>
      <species metaid="M_dad_2_c" id="M_dad_2_c" name="M_dad_2_c" compartment="c" initialAmount="1" hasOnlySubstanceUnits="false" boundaryCondition="false" constant="false"/>
      <species metaid="M_trnaglu_c" id="M_trnaglu_c" name="M_trnaglu_c" compartment="c" initialAmount="1" hasOnlySubstanceUnits="false" boundaryCondition="false" constant="false"/>
      <species metaid="M_glutrna_c" id="M_glutrna_c" name="M_glutrna_c" compartment="c" initialAmount="1" hasOnlySubstanceUnits="false" boundaryCondition="false" constant="false"/>
      <species metaid="M_glu1sa_c" id="M_glu1sa_c" name="M_glu1sa_c" compartment="c" initialAmount="1" hasOnlySubstanceUnits="false" boundaryCondition="false" constant="false"/>
      <species metaid="M_5aop_c" id="M_5aop_c" name="M_5aop_c" compartment="c" initialAmount="1" hasOnlySubstanceUnits="false" boundaryCondition="false" constant="false"/>
      <species metaid="M_ppbng_c" id="M_ppbng_c" name="M_ppbng_c" compartment="c" initialAmount="1" hasOnlySubstanceUnits="false" boundaryCondition="false" constant="false"/>
      <species metaid="M_hmbil_c" id="M_hmbil_c" name="M_hmbil_c" compartment="c" initialAmount="1" hasOnlySubstanceUnits="false" boundaryCondition="false" constant="false"/>
      <species metaid="M_uppg3_c" id="M_uppg3_c" name="M_uppg3_c" compartment="c" initialAmount="1" hasOnlySubstanceUnits="false" boundaryCondition="false" constant="false"/>
      <species metaid="M_cpppg3_c" id="M_cpppg3_c" name="M_cpppg3_c" compartment="c" initialAmount="1" hasOnlySubstanceUnits="false" boundaryCondition="false" constant="false"/>
      <species metaid="M_pppg9_c" id="M_pppg9_c" name="M_pppg9_c" compartment="c" initialAmount="1" hasOnlySubstanceUnits="false" boundaryCondition="false" constant="false"/>
      <species metaid="M_ppp9_c" id="M_ppp9_c" name="M_ppp9_c" compartment="c" initialAmount="1" hasOnlySubstanceUnits="false" boundaryCondition="false" constant="false"/>
      <species metaid="M_fe2_c" id="M_fe2_c" name="M_fe2_c" compartment="c" initialAmount="1" hasOnlySubstanceUnits="false" boundaryCondition="false" constant="false"/>
      <species metaid="M_pheme_c" id="M_pheme_c" name="M_pheme_c" compartment="c" initialAmount="1" hasOnlySubstanceUnits="false" boundaryCondition="false" constant="false"/>
      <species metaid="M_frdp_c" id="M_frdp_c" name="M_frdp_c" compartment="c" initialAmount="1" hasOnlySubstanceUnits="false" boundaryCondition="false" constant="false"/>
      <species metaid="M_hemeO_c" id="M_hemeO_c" name="M_hemeO_c" compartment="c" initialAmount="1" hasOnlySubstanceUnits="false" boundaryCondition="false" constant="false"/>
      <species metaid="M_ichor_c" id="M_ichor_c" name="M_ichor_c" compartment="c" initialAmount="1" hasOnlySubstanceUnits="false" boundaryCondition="false" constant="false"/>
      <species metaid="M_2shchc_c" id="M_2shchc_c" name="M_2shchc_c" compartment="c" initialAmount="1" hasOnlySubstanceUnits="false" boundaryCondition="false" constant="false"/>
      <species metaid="M_sucbz_c" id="M_sucbz_c" name="M_sucbz_c" compartment="c" initialAmount="1" hasOnlySubstanceUnits="false" boundaryCondition="false" constant="false"/>
      <species metaid="M_sbzcoa_c" id="M_sbzcoa_c" name="M_sbzcoa_c" compartment="c" initialAmount="1" hasOnlySubstanceUnits="false" boundaryCondition="false" constant="false"/>
      <species metaid="M_dhna_c" id="M_dhna_c" name="M_dhna_c" compartment="c" initialAmount="1" hasOnlySubstanceUnits="false" boundaryCondition="false" constant="false"/>
      <species metaid="M_2dmmq8_c" id="M_2dmmq8_c" name="M_2dmmq8_c" compartment="c" initialAmount="1" hasOnlySubstanceUnits="false" boundaryCondition="false" constant="false"/>
      <species metaid="M_acald_c" id="M_acald_c" name="M_acald_c" compartment="c" initialAmount="1" hasOnlySubstanceUnits="false" boundaryCondition="false" constant="false"/>
      <species metaid="M_etoh_c" id="M_etoh_c" name="M_etoh_c" compartment="c" initialAmount="1" hasOnlySubstanceUnits="false" boundaryCondition="false" constant="false"/>
      <species metaid="M_glyc_R_c" id="M_glyc_R_c" name="M_glyc_R_c" compartment="c" initialAmount="1" hasOnlySubstanceUnits="false" boundaryCondition="false" constant="false"/>
      <species metaid="M_acgam6p_c" id="M_acgam6p_c" name="M_acgam6p_c" compartment="c" initialAmount="1" hasOnlySubstanceUnits="false" boundaryCondition="false" constant="false"/>
      <species metaid="M_rib_D_c" id="M_rib_D_c" name="M_rib_D_c" compartment="c" initialAmount="1" hasOnlySubstanceUnits="false" boundaryCondition="false" constant="false"/>
      <species metaid="M_xyl_D_c" id="M_xyl_D_c" name="M_xyl_D_c" compartment="c" initialAmount="1" hasOnlySubstanceUnits="false" boundaryCondition="false" constant="false"/>
      <species metaid="M_gal_c" id="M_gal_c" name="M_gal_c" compartment="c" initialAmount="1" hasOnlySubstanceUnits="false" boundaryCondition="false" constant="false"/>
      <species metaid="M_gal1p_c" id="M_gal1p_c" name="M_gal1p_c" compartment="c" initialAmount="1" hasOnlySubstanceUnits="false" boundaryCondition="false" constant="false"/>
      <species metaid="M_glcn_c" id="M_glcn_c" name="M_glcn_c" compartment="c" initialAmount="1" hasOnlySubstanceUnits="false" boundaryCondition="false" constant="false"/>
      <species metaid="M_ppa_c" id="M_ppa_c" name="M_ppa_c" compartment="c" initialAmount="1" hasOnlySubstanceUnits="false" boundaryCondition="false" constant="false"/>
      <species metaid="M_4abut_c" id="M_4abut_c" name="M_4abut_c" compartment="c" initialAmount="1" hasOnlySubstanceUnits="false" boundaryCondition="false" constant="false"/>
      <species metaid="M_sucsal_c" id="M_sucsal_c" name="M_sucsal_c" compartment="c" initialAmount="1" hasOnlySubstanceUnits="false" boundaryCondition="false" constant="false"/>
      <species metaid="M_aps_c" id="M_aps_c" name="M_aps_c" compartment="c" initialAmount="1" hasOnlySubstanceUnits="false" boundaryCondition="false" constant="false"/>
      <species metaid="M_paps_c" id="M_paps_c" name="M_paps_c" compartment="c" initialAmount="1" hasOnlySubstanceUnits="false" boundaryCondition="false" constant="false"/>
      <species metaid="M_pap_c" id="M_pap_c" name="M_pap_c" compartment="c" initialAmount="1" hasOnlySubstanceUnits="false" boundaryCondition="false" constant="false"/>
      <species metaid="M_urea_c" id="M_urea_c" name="M_urea_c" compartment="c" initialAmount="1" hasOnlySubstanceUnits="false" boundaryCondition="false" constant="false"/>
      <species metaid="M_kapa_c" id="M_kapa_c" name="M_kapa_c" compartment="c" initialAmount="1" hasOnlySubstanceUnits="false" boundaryCondition="false" constant="false"/>
      <species metaid="M_dann_c" id="M_dann_c" name="M_dann_c" compartment="c" initialAmount="1" hasOnlySubstanceUnits="false" boundaryCondition="false" constant="false"/>
      <species metaid="M_dtbt_c" id="M_dtbt_c" name="M_dtbt_c" compartment="c" initialAmount="1" hasOnlySubstanceUnits="false" boundaryCondition="false" constant="false"/>
      <species metaid="M_btn_c" id="M_btn_c" name="M_btn_c" compartment="c" initialAmount="1" hasOnlySubstanceUnits="false" boundaryCondition="false" constant="false"/>
      <species metaid="M_itn_c" id="M_itn_c" name="M_itn_c" compartment="c" initialAmount="1" hasOnlySubstanceUnits="false" boundaryCondition="false" constant="false"/>
      <species metaid="M_itn_e" id="M_itn_e" name="M_itn_e" compartment="e" initialAmount="1" hasOnlySubstanceUnits="false" boundaryCondition="false" constant="false"/>
      <species metaid="M_urea_e" id="M_urea_e" name="M_urea_e" compartment="e" initialAmount="1" hasOnlySubstanceUnits="false" boundaryCondition="false" constant="false"/>
      <species metaid="M_no3_e" id="M_no3_e" name="M_no3_e" compartment="e" initialAmount="1" hasOnlySubstanceUnits="false" boundaryCondition="false" constant="false"/>
      <species metaid="M_phe_L_e" id="M_phe_L_e" name="M_phe_L_e" compartment="e" initialAmount="1" hasOnlySubstanceUnits="false" boundaryCondition="false" constant="false"/>
      <species metaid="M_fru_e" id="M_fru_e" name="M_fru_e" compartment="e" initialAmount="1" hasOnlySubstanceUnits="false" boundaryCondition="false" constant="false"/>
      <species metaid="M_man_e" id="M_man_e" name="M_man_e" compartment="e" initialAmount="1" hasOnlySubstanceUnits="false" boundaryCondition="false" constant="false"/>
      <species metaid="M_sucr_e" id="M_sucr_e" name="M_sucr_e" compartment="e" initialAmount="1" hasOnlySubstanceUnits="false" boundaryCondition="false" constant="false"/>
      <species metaid="M_tre_e" id="M_tre_e" name="M_tre_e" compartment="e" initialAmount="1" hasOnlySubstanceUnits="false" boundaryCondition="false" constant="false"/>
      <species metaid="M_rib_D_e" id="M_rib_D_e" name="M_rib_D_e" compartment="e" initialAmount="1" hasOnlySubstanceUnits="false" boundaryCondition="false" constant="false"/>
      <species metaid="M_xyl_D_e" id="M_xyl_D_e" name="M_xyl_D_e" compartment="e" initialAmount="1" hasOnlySubstanceUnits="false" boundaryCondition="false" constant="false"/>
      <species metaid="M_ura_e" id="M_ura_e" name="M_ura_e" compartment="e" initialAmount="1" hasOnlySubstanceUnits="false" boundaryCondition="false" constant="false"/>
      <species metaid="M_orn_e" id="M_orn_e" name="M_orn_e" compartment="e" initialAmount="1" hasOnlySubstanceUnits="false" boundaryCondition="false" constant="false"/>
      <species metaid="M_glcn_e" id="M_glcn_e" name="M_glcn_e" compartment="e" initialAmount="1" hasOnlySubstanceUnits="false" boundaryCondition="false" constant="false"/>
      <species metaid="M_4abut_e" id="M_4abut_e" name="M_4abut_e" compartment="e" initialAmount="1" hasOnlySubstanceUnits="false" boundaryCondition="false" constant="false"/>
      <species metaid="M_ncam_e" id="M_ncam_e" name="M_ncam_e" compartment="e" initialAmount="1" hasOnlySubstanceUnits="false" boundaryCondition="false" constant="false"/>
      <species metaid="M_no2_e" id="M_no2_e" name="M_no2_e" compartment="e" initialAmount="1" hasOnlySubstanceUnits="false" boundaryCondition="false" constant="false"/>
      <species metaid="M_pant_R_e" id="M_pant_R_e" name="M_pant_R_e" compartment="e" initialAmount="1" hasOnlySubstanceUnits="false" boundaryCondition="false" constant="false"/>
      <species metaid="M_btn_e" id="M_btn_e" name="M_btn_e" compartment="e" initialAmount="1" hasOnlySubstanceUnits="false" boundaryCondition="false" constant="false"/>
      <species metaid="M_glyc_e" id="M_glyc_e" name="M_glyc_e" compartment="e" initialAmount="1" hasOnlySubstanceUnits="false" boundaryCondition="false" constant="false"/>
      <species metaid="M_etoh_e" id="M_etoh_e" name="M_etoh_e" compartment="e" initialAmount="1" hasOnlySubstanceUnits="false" boundaryCondition="false" constant="false"/>
      <species metaid="M_gal_e" id="M_gal_e" name="M_gal_e" compartment="e" initialAmount="1" hasOnlySubstanceUnits="false" boundaryCondition="false" constant="false"/>
      <species metaid="M_glyc_R_e" id="M_glyc_R_e" name="M_glyc_R_e" compartment="e" initialAmount="1" hasOnlySubstanceUnits="false" boundaryCondition="false" constant="false"/>
      <species metaid="M_ppa_e" id="M_ppa_e" name="M_ppa_e" compartment="e" initialAmount="1" hasOnlySubstanceUnits="false" boundaryCondition="false" constant="false"/>
      <species metaid="M_for_e" id="M_for_e" name="M_for_e" compartment="e" initialAmount="1" hasOnlySubstanceUnits="false" boundaryCondition="false" constant="false"/>
      <species metaid="M_lac_D_e" id="M_lac_D_e" name="M_lac_D_e" compartment="e" initialAmount="1" hasOnlySubstanceUnits="false" boundaryCondition="false" constant="false"/>
      <species metaid="M_asn_L_e" id="M_asn_L_e" name="M_asn_L_e" compartment="e" initialAmount="1" hasOnlySubstanceUnits="false" boundaryCondition="false" constant="false"/>
      <species metaid="M_asp_L_e" id="M_asp_L_e" name="M_asp_L_e" compartment="e" initialAmount="1" hasOnlySubstanceUnits="false" boundaryCondition="false" constant="false"/>
      <species metaid="M_gly_e" id="M_gly_e" name="M_gly_e" compartment="e" initialAmount="1" hasOnlySubstanceUnits="false" boundaryCondition="false" constant="false"/>
      <species metaid="M_cys_L_e" id="M_cys_L_e" name="M_cys_L_e" compartment="e" initialAmount="1" hasOnlySubstanceUnits="false" boundaryCondition="false" constant="false"/>
      <species metaid="M_his_L_e" id="M_his_L_e" name="M_his_L_e" compartment="e" initialAmount="1" hasOnlySubstanceUnits="false" boundaryCondition="false" constant="false"/>
      <species metaid="M_ppi_e" id="M_ppi_e" name="M_ppi_e" compartment="e" initialAmount="1" hasOnlySubstanceUnits="false" boundaryCondition="false" constant="false"/>
      <species metaid="M_pyr_e" id="M_pyr_e" name="M_pyr_e" compartment="e" initialAmount="1" hasOnlySubstanceUnits="false" boundaryCondition="false" constant="false"/>
      <species metaid="M_acgam_e" id="M_acgam_e" name="M_acgam_e" compartment="e" initialAmount="1" hasOnlySubstanceUnits="false" boundaryCondition="false" constant="false"/>
      <species metaid="M_fe2_e" id="M_fe2_e" name="M_fe2_e" compartment="e" initialAmount="1" hasOnlySubstanceUnits="false" boundaryCondition="false" constant="false"/>
      <species metaid="M_fum_e" id="M_fum_e" name="M_fum_e" compartment="e" initialAmount="1" hasOnlySubstanceUnits="false" boundaryCondition="false" constant="false"/>
      <species metaid="M_mal_L_e" id="M_mal_L_e" name="M_mal_L_e" compartment="e" initialAmount="1" hasOnlySubstanceUnits="false" boundaryCondition="false" constant="false"/>
      <species metaid="M_hom_L_e" id="M_hom_L_e" name="M_hom_L_e" compartment="e" initialAmount="1" hasOnlySubstanceUnits="false" boundaryCondition="false" constant="false"/>
      <species metaid="M_gam_e" id="M_gam_e" name="M_gam_e" compartment="e" initialAmount="1" hasOnlySubstanceUnits="false" boundaryCondition="false" constant="false"/>
      <species metaid="M_gam_c" id="M_gam_c" name="M_gam_c" compartment="c" initialAmount="1" hasOnlySubstanceUnits="false" boundaryCondition="false" constant="false"/>
      <species metaid="M_ara_e" id="M_ara_e" name="M_ara_e" compartment="e" initialAmount="1" hasOnlySubstanceUnits="false" boundaryCondition="false" constant="false"/>
      <species metaid="M_ara_c" id="M_ara_c" name="M_ara_c" compartment="c" initialAmount="1" hasOnlySubstanceUnits="false" boundaryCondition="false" constant="false"/>
      <species metaid="M_hcys_c" id="M_hcys_c" name="M_hcys_c" compartment="c" initialAmount="1" hasOnlySubstanceUnits="false" boundaryCondition="false" constant="false"/>
      <species metaid="M_hma_c" id="M_hma_c" name="M_hma_c" compartment="c" initialAmount="1" hasOnlySubstanceUnits="false" boundaryCondition="false" constant="false"/>
      <species metaid="M_pca_e" id="M_pca_e" name="M_pca_e" compartment="e" initialAmount="1" hasOnlySubstanceUnits="false" boundaryCondition="false" constant="false"/>
      <species metaid="M_pca_c" id="M_pca_c" name="M_pca_c" compartment="c" initialAmount="1" hasOnlySubstanceUnits="false" boundaryCondition="false" constant="false"/>
      <species metaid="M_malt_e" id="M_malt_e" name="M_malt_e" compartment="e" initialAmount="1" hasOnlySubstanceUnits="false" boundaryCondition="false" constant="false"/>
      <species metaid="M_malt_c" id="M_malt_c" name="M_malt_c" compartment="c" initialAmount="1" hasOnlySubstanceUnits="false" boundaryCondition="false" constant="false"/>
    </listOfSpecies>
    <listOfParameters>
      <parameter id="FB1N1000" value="-1000" constant="true"/>
      <parameter id="FB2N4" value="-3.55" constant="true"/>
      <parameter id="FB3N0" value="0" constant="true"/>
      <parameter id="FB4N1000" value="1000" constant="true"/>
    </listOfParameters>
    <listOfReactions>
      <reaction metaid="R_R_glk" id="R_R_glk" name="glk" reversible="false" fast="false" fbc:lowerFluxBound="FB3N0" fbc:upperFluxBound="FB3N0">
        <notes>
          <body xmlns="http://www.w3.org/1999/xhtml">
            <p>SUBSYSTEM: GlycolysisGluconeogenesis</p>
          </body>
        </notes>
        <listOfReactants>
          <speciesReference species="M_atp_c" stoichiometry="1" constant="true"/>
          <speciesReference species="M_glc_D_c" stoichiometry="1" constant="true"/>
        </listOfReactants>
        <listOfProducts>
          <speciesReference species="M_adp_c" stoichiometry="1" constant="true"/>
          <speciesReference species="M_g6p_c" stoichiometry="1" constant="true"/>
        </listOfProducts>
        <fbc:geneProductAssociation>
          <fbc:geneProductRef fbc:geneProduct="glk"/>
        </fbc:geneProductAssociation>
      </reaction>
      <reaction metaid="R_R_pgi" id="R_R_pgi" name="pgi" reversible="true" fast="false" fbc:lowerFluxBound="FB1N1000" fbc:upperFluxBound="FB4N1000">
        <notes>
          <body xmlns="http://www.w3.org/1999/xhtml">
            <p>SUBSYSTEM: GlycolysisGluconeogenesis</p>
          </body>
        </notes>
        <listOfReactants>
          <speciesReference species="M_g6p_c" stoichiometry="1" constant="true"/>
        </listOfReactants>
        <listOfProducts>
          <speciesReference species="M_f6p_c" stoichiometry="1" constant="true"/>
        </listOfProducts>
        <fbc:geneProductAssociation>
          <fbc:geneProductRef fbc:geneProduct="pgi"/>
        </fbc:geneProductAssociation>
      </reaction>
      <reaction metaid="R_R_pfkA" id="R_R_pfkA" name="pfkA" reversible="false" fast="false" fbc:lowerFluxBound="FB3N0" fbc:upperFluxBound="FB4N1000">
        <notes>
          <body xmlns="http://www.w3.org/1999/xhtml">
            <p>SUBSYSTEM: GlycolysisGluconeogenesis</p>
          </body>
        </notes>
        <listOfReactants>
          <speciesReference species="M_atp_c" stoichiometry="1" constant="true"/>
          <speciesReference species="M_f6p_c" stoichiometry="1" constant="true"/>
        </listOfReactants>
        <listOfProducts>
          <speciesReference species="M_adp_c" stoichiometry="1" constant="true"/>
          <speciesReference species="M_fdp_c" stoichiometry="1" constant="true"/>
        </listOfProducts>
        <fbc:geneProductAssociation>
          <fbc:geneProductRef fbc:geneProduct="pfkA"/>
        </fbc:geneProductAssociation>
      </reaction>
      <reaction metaid="R_R_fbp" id="R_R_fbp" name="fbp" reversible="false" fast="false" fbc:lowerFluxBound="FB3N0" fbc:upperFluxBound="FB4N1000">
        <notes>
          <body xmlns="http://www.w3.org/1999/xhtml">
            <p>SUBSYSTEM: GlycolysisGluconeogenesis</p>
          </body>
        </notes>
        <listOfReactants>
          <speciesReference species="M_fdp_c" stoichiometry="1" constant="true"/>
          <speciesReference species="M_h2o_c" stoichiometry="1" constant="true"/>
        </listOfReactants>
        <listOfProducts>
          <speciesReference species="M_h_c" stoichiometry="3" constant="true"/>
          <speciesReference species="M_f6p_c" stoichiometry="1" constant="true"/>
          <speciesReference species="M_pi_c" stoichiometry="1" constant="true"/>
        </listOfProducts>
        <fbc:geneProductAssociation>
          <fbc:geneProductRef fbc:geneProduct="fbp"/>
        </fbc:geneProductAssociation>
      </reaction>
      <reaction metaid="R_R_fda" id="R_R_fda" name="fda" reversible="true" fast="false" fbc:lowerFluxBound="FB1N1000" fbc:upperFluxBound="FB4N1000">
        <notes>
          <body xmlns="http://www.w3.org/1999/xhtml">
            <p>SUBSYSTEM: GlycolysisGluconeogenesis</p>
          </body>
        </notes>
        <listOfReactants>
          <speciesReference species="M_fdp_c" stoichiometry="1" constant="true"/>
        </listOfReactants>
        <listOfProducts>
          <speciesReference species="M_dhap_c" stoichiometry="1" constant="true"/>
          <speciesReference species="M_g3p_c" stoichiometry="1" constant="true"/>
        </listOfProducts>
        <fbc:geneProductAssociation>
          <fbc:geneProductRef fbc:geneProduct="fda"/>
        </fbc:geneProductAssociation>
      </reaction>
      <reaction metaid="R_R_tpiA" id="R_R_tpiA" name="tpiA" reversible="false" fast="false" fbc:lowerFluxBound="FB3N0" fbc:upperFluxBound="FB4N1000">
        <notes>
          <body xmlns="http://www.w3.org/1999/xhtml">
            <p>SUBSYSTEM: GlycolysisGluconeogenesis</p>
          </body>
        </notes>
        <listOfReactants>
          <speciesReference species="M_dhap_c" stoichiometry="1" constant="true"/>
        </listOfReactants>
        <listOfProducts>
          <speciesReference species="M_g3p_c" stoichiometry="1" constant="true"/>
        </listOfProducts>
        <fbc:geneProductAssociation>
          <fbc:geneProductRef fbc:geneProduct="tpiA"/>
        </fbc:geneProductAssociation>
      </reaction>
      <reaction metaid="R_R_gapA" id="R_R_gapA" name="gapA" reversible="false" fast="false" fbc:lowerFluxBound="FB3N0" fbc:upperFluxBound="FB4N1000">
        <notes>
          <body xmlns="http://www.w3.org/1999/xhtml">
            <p>SUBSYSTEM: GlycolysisGluconeogenesis</p>
          </body>
        </notes>
        <listOfReactants>
          <speciesReference species="M_h_c" stoichiometry="2" constant="true"/>
          <speciesReference species="M_pi_c" stoichiometry="1" constant="true"/>
          <speciesReference species="M_g3p_c" stoichiometry="1" constant="true"/>
          <speciesReference species="M_nad_c" stoichiometry="1" constant="true"/>
        </listOfReactants>
        <listOfProducts>
          <speciesReference species="M_13dpg_c" stoichiometry="1" constant="true"/>
          <speciesReference species="M_nadh_c" stoichiometry="1" constant="true"/>
        </listOfProducts>
        <fbc:geneProductAssociation>
          <fbc:geneProductRef fbc:geneProduct="gapA"/>
        </fbc:geneProductAssociation>
      </reaction>
      <reaction metaid="R_R_gapB" id="R_R_gapB" name="gapB" reversible="false" fast="false" fbc:lowerFluxBound="FB3N0" fbc:upperFluxBound="FB4N1000">
        <notes>
          <body xmlns="http://www.w3.org/1999/xhtml">
            <p>SUBSYSTEM: GlycolysisGluconeogenesis</p>
          </body>
        </notes>
        <listOfReactants>
          <speciesReference species="M_13dpg_c" stoichiometry="1" constant="true"/>
          <speciesReference species="M_nadph_c" stoichiometry="1" constant="true"/>
        </listOfReactants>
        <listOfProducts>
          <speciesReference species="M_pi_c" stoichiometry="1" constant="true"/>
          <speciesReference species="M_g3p_c" stoichiometry="1" constant="true"/>
          <speciesReference species="M_nadp_c" stoichiometry="1" constant="true"/>
        </listOfProducts>
        <fbc:geneProductAssociation>
          <fbc:geneProductRef fbc:geneProduct="gapB"/>
        </fbc:geneProductAssociation>
      </reaction>
      <reaction metaid="R_R_pgk" id="R_R_pgk" name="pgk" reversible="true" fast="false" fbc:lowerFluxBound="FB1N1000" fbc:upperFluxBound="FB4N1000">
        <notes>
          <body xmlns="http://www.w3.org/1999/xhtml">
            <p>SUBSYSTEM: GlycolysisGluconeogenesis</p>
          </body>
        </notes>
        <listOfReactants>
          <speciesReference species="M_adp_c" stoichiometry="1" constant="true"/>
          <speciesReference species="M_13dpg_c" stoichiometry="1" constant="true"/>
        </listOfReactants>
        <listOfProducts>
          <speciesReference species="M_atp_c" stoichiometry="1" constant="true"/>
          <speciesReference species="M_3pg_c" stoichiometry="1" constant="true"/>
        </listOfProducts>
        <fbc:geneProductAssociation>
          <fbc:geneProductRef fbc:geneProduct="pgk"/>
        </fbc:geneProductAssociation>
      </reaction>
      <reaction metaid="R_R_pgm" id="R_R_pgm" name="pgm" reversible="true" fast="false" fbc:lowerFluxBound="FB1N1000" fbc:upperFluxBound="FB4N1000">
        <notes>
          <body xmlns="http://www.w3.org/1999/xhtml">
            <p>SUBSYSTEM: GlycolysisGluconeogenesis</p>
          </body>
        </notes>
        <listOfReactants>
          <speciesReference species="M_3pg_c" stoichiometry="1" constant="true"/>
        </listOfReactants>
        <listOfProducts>
          <speciesReference species="M_2pg_c" stoichiometry="1" constant="true"/>
        </listOfProducts>
        <fbc:geneProductAssociation>
          <fbc:geneProductRef fbc:geneProduct="pgm"/>
        </fbc:geneProductAssociation>
      </reaction>
      <reaction metaid="R_R_eno" id="R_R_eno" name="eno" reversible="true" fast="false" fbc:lowerFluxBound="FB1N1000" fbc:upperFluxBound="FB4N1000">
        <notes>
          <body xmlns="http://www.w3.org/1999/xhtml">
            <p>SUBSYSTEM: GlycolysisGluconeogenesis</p>
          </body>
        </notes>
        <listOfReactants>
          <speciesReference species="M_2pg_c" stoichiometry="1" constant="true"/>
        </listOfReactants>
        <listOfProducts>
          <speciesReference species="M_h2o_c" stoichiometry="1" constant="true"/>
          <speciesReference species="M_pep_c" stoichiometry="1" constant="true"/>
        </listOfProducts>
        <fbc:geneProductAssociation>
          <fbc:geneProductRef fbc:geneProduct="eno"/>
        </fbc:geneProductAssociation>
      </reaction>
      <reaction metaid="R_R_pyk" id="R_R_pyk" name="pyk" reversible="false" fast="false" fbc:lowerFluxBound="FB3N0" fbc:upperFluxBound="FB4N1000">
        <notes>
          <body xmlns="http://www.w3.org/1999/xhtml">
            <p>SUBSYSTEM: GlycolysisGluconeogenesis</p>
          </body>
        </notes>
        <listOfReactants>
          <speciesReference species="M_adp_c" stoichiometry="1" constant="true"/>
          <speciesReference species="M_pep_c" stoichiometry="1" constant="true"/>
        </listOfReactants>
        <listOfProducts>
          <speciesReference species="M_atp_c" stoichiometry="1" constant="true"/>
          <speciesReference species="M_pyr_c" stoichiometry="1" constant="true"/>
        </listOfProducts>
        <fbc:geneProductAssociation>
          <fbc:geneProductRef fbc:geneProduct="pyk"/>
        </fbc:geneProductAssociation>
      </reaction>
      <reaction metaid="R_R_ldh" id="R_R_ldh" name="ldh" reversible="true" fast="false" fbc:lowerFluxBound="FB1N1000" fbc:upperFluxBound="FB4N1000">
        <notes>
          <body xmlns="http://www.w3.org/1999/xhtml">
            <p>SUBSYSTEM: Oxidative Phosphorylation</p>
          </body>
        </notes>
        <listOfReactants>
          <speciesReference species="M_h_c" stoichiometry="1" constant="true"/>
          <speciesReference species="M_nadh_c" stoichiometry="1" constant="true"/>
          <speciesReference species="M_pyr_c" stoichiometry="1" constant="true"/>
        </listOfReactants>
        <listOfProducts>
          <speciesReference species="M_nad_c" stoichiometry="1" constant="true"/>
          <speciesReference species="M_lac_L_c" stoichiometry="1" constant="true"/>
        </listOfProducts>
        <fbc:geneProductAssociation>
          <fbc:geneProductRef fbc:geneProduct="ldh"/>
        </fbc:geneProductAssociation>
      </reaction>
      <reaction metaid="R_R_pps" id="R_R_pps" name="pps" reversible="false" fast="false" fbc:lowerFluxBound="FB3N0" fbc:upperFluxBound="FB3N0">
        <notes>
          <body xmlns="http://www.w3.org/1999/xhtml">
            <p>SUBSYSTEM: GlycolysisGluconeogenesis</p>
          </body>
        </notes>
        <listOfReactants>
          <speciesReference species="M_atp_c" stoichiometry="1" constant="true"/>
          <speciesReference species="M_h2o_c" stoichiometry="1" constant="true"/>
          <speciesReference species="M_pyr_c" stoichiometry="1" constant="true"/>
        </listOfReactants>
        <listOfProducts>
          <speciesReference species="M_h_c" stoichiometry="3" constant="true"/>
          <speciesReference species="M_pi_c" stoichiometry="1" constant="true"/>
          <speciesReference species="M_pep_c" stoichiometry="1" constant="true"/>
          <speciesReference species="M_amp_c" stoichiometry="1" constant="true"/>
        </listOfProducts>
        <fbc:geneProductAssociation>
          <fbc:geneProductRef fbc:geneProduct="pps"/>
        </fbc:geneProductAssociation>
      </reaction>
      <reaction metaid="R_R_mez" id="R_R_mez" name="mez" reversible="false" fast="false" fbc:lowerFluxBound="FB3N0" fbc:upperFluxBound="FB4N1000">
        <notes>
          <body xmlns="http://www.w3.org/1999/xhtml">
            <p>SUBSYSTEM: Anaplerotic reactions</p>
          </body>
        </notes>
        <listOfReactants>
          <speciesReference species="M_nadp_c" stoichiometry="1" constant="true"/>
          <speciesReference species="M_mal_L_c" stoichiometry="1" constant="true"/>
        </listOfReactants>
        <listOfProducts>
          <speciesReference species="M_h_c" stoichiometry="1" constant="true"/>
          <speciesReference species="M_nadph_c" stoichiometry="1" constant="true"/>
          <speciesReference species="M_pyr_c" stoichiometry="1" constant="true"/>
          <speciesReference species="M_co2_c" stoichiometry="1" constant="true"/>
        </listOfProducts>
        <fbc:geneProductAssociation>
          <fbc:geneProductRef fbc:geneProduct="mez"/>
        </fbc:geneProductAssociation>
      </reaction>
      <reaction metaid="R_R_pta" id="R_R_pta" name="pta" reversible="true" fast="false" fbc:lowerFluxBound="FB1N1000" fbc:upperFluxBound="FB4N1000">
        <notes>
          <body xmlns="http://www.w3.org/1999/xhtml">
            <p>SUBSYSTEM: Pyruvate Metabolism</p>
          </body>
        </notes>
        <listOfReactants>
          <speciesReference species="M_h_c" stoichiometry="3" constant="true"/>
          <speciesReference species="M_pi_c" stoichiometry="1" constant="true"/>
          <speciesReference species="M_accoa_c" stoichiometry="1" constant="true"/>
        </listOfReactants>
        <listOfProducts>
          <speciesReference species="M_actp_c" stoichiometry="1" constant="true"/>
          <speciesReference species="M_coa_c" stoichiometry="1" constant="true"/>
        </listOfProducts>
        <fbc:geneProductAssociation>
          <fbc:geneProductRef fbc:geneProduct="pta"/>
        </fbc:geneProductAssociation>
      </reaction>
      <reaction metaid="R_R_ackA" id="R_R_ackA" name="ackA" reversible="true" fast="false" fbc:lowerFluxBound="FB1N1000" fbc:upperFluxBound="FB4N1000">
        <notes>
          <body xmlns="http://www.w3.org/1999/xhtml">
            <p>SUBSYSTEM: Pyruvate Metabolism</p>
          </body>
        </notes>
        <listOfReactants>
          <speciesReference species="M_h_c" stoichiometry="1" constant="true"/>
          <speciesReference species="M_atp_c" stoichiometry="1" constant="true"/>
          <speciesReference species="M_ac_c" stoichiometry="1" constant="true"/>
        </listOfReactants>
        <listOfProducts>
          <speciesReference species="M_adp_c" stoichiometry="1" constant="true"/>
          <speciesReference species="M_actp_c" stoichiometry="1" constant="true"/>
        </listOfProducts>
        <fbc:geneProductAssociation>
          <fbc:geneProductRef fbc:geneProduct="ackA"/>
        </fbc:geneProductAssociation>
      </reaction>
      <reaction metaid="R_R_pqo" id="R_R_pqo" name="pqo" reversible="false" fast="false" fbc:lowerFluxBound="FB3N0" fbc:upperFluxBound="FB4N1000">
        <notes>
          <body xmlns="http://www.w3.org/1999/xhtml">
            <p>SUBSYSTEM: Oxidative Phosphorylation</p>
          </body>
        </notes>
        <listOfReactants>
          <speciesReference species="M_h2o_c" stoichiometry="1" constant="true"/>
          <speciesReference species="M_pyr_c" stoichiometry="1" constant="true"/>
          <speciesReference species="M_q8_c" stoichiometry="1" constant="true"/>
        </listOfReactants>
        <listOfProducts>
          <speciesReference species="M_co2_c" stoichiometry="1" constant="true"/>
          <speciesReference species="M_ac_c" stoichiometry="1" constant="true"/>
          <speciesReference species="M_q8h2_c" stoichiometry="1" constant="true"/>
        </listOfProducts>
        <fbc:geneProductAssociation>
          <fbc:geneProductRef fbc:geneProduct="poxB"/>
        </fbc:geneProductAssociation>
      </reaction>
      <reaction metaid="R_R_fdhF" id="R_R_fdhF" name="fdhF" reversible="false" fast="false" fbc:lowerFluxBound="FB3N0" fbc:upperFluxBound="FB4N1000">
        <notes>
          <body xmlns="http://www.w3.org/1999/xhtml">
            <p>SUBSYSTEM: Pyruvate Metabolism</p>
          </body>
        </notes>
        <listOfReactants>
          <speciesReference species="M_nad_c" stoichiometry="1" constant="true"/>
          <speciesReference species="M_for_c" stoichiometry="1" constant="true"/>
        </listOfReactants>
        <listOfProducts>
          <speciesReference species="M_h_c" stoichiometry="1" constant="true"/>
          <speciesReference species="M_nadh_c" stoichiometry="1" constant="true"/>
          <speciesReference species="M_co2_c" stoichiometry="1" constant="true"/>
        </listOfProducts>
        <fbc:geneProductAssociation>
          <fbc:geneProductRef fbc:geneProduct="fdhF"/>
        </fbc:geneProductAssociation>
      </reaction>
      <reaction metaid="R_R_pdh" id="R_R_pdh" name="pdh" reversible="false" fast="false" fbc:lowerFluxBound="FB3N0" fbc:upperFluxBound="FB4N1000">
        <notes>
          <body xmlns="http://www.w3.org/1999/xhtml">
            <p>SUBSYSTEM: GlycolysisGluconeogenesis</p>
          </body>
        </notes>
        <listOfReactants>
          <speciesReference species="M_nad_c" stoichiometry="1" constant="true"/>
          <speciesReference species="M_pyr_c" stoichiometry="1" constant="true"/>
          <speciesReference species="M_coa_c" stoichiometry="1" constant="true"/>
        </listOfReactants>
        <listOfProducts>
          <speciesReference species="M_h_c" stoichiometry="1" constant="true"/>
          <speciesReference species="M_nadh_c" stoichiometry="1" constant="true"/>
          <speciesReference species="M_co2_c" stoichiometry="1" constant="true"/>
          <speciesReference species="M_accoa_c" stoichiometry="1" constant="true"/>
        </listOfProducts>
        <fbc:geneProductAssociation>
          <fbc:geneProductRef fbc:geneProduct="pdh"/>
        </fbc:geneProductAssociation>
      </reaction>
      <reaction metaid="R_R_gltA" id="R_R_gltA" name="gltA" reversible="false" fast="false" fbc:lowerFluxBound="FB3N0" fbc:upperFluxBound="FB4N1000">
        <notes>
          <body xmlns="http://www.w3.org/1999/xhtml">
            <p>SUBSYSTEM: Citric Acid Cycle</p>
          </body>
        </notes>
        <listOfReactants>
          <speciesReference species="M_h2o_c" stoichiometry="1" constant="true"/>
          <speciesReference species="M_accoa_c" stoichiometry="1" constant="true"/>
          <speciesReference species="M_oaa_c" stoichiometry="1" constant="true"/>
        </listOfReactants>
        <listOfProducts>
          <speciesReference species="M_coa_c" stoichiometry="1" constant="true"/>
          <speciesReference species="M_cit_c" stoichiometry="1" constant="true"/>
        </listOfProducts>
        <fbc:geneProductAssociation>
          <fbc:geneProductRef fbc:geneProduct="gltA"/>
        </fbc:geneProductAssociation>
      </reaction>
      <reaction metaid="R_R_acnA" id="R_R_acnA" name="acnA" reversible="true" fast="false" fbc:lowerFluxBound="FB1N1000" fbc:upperFluxBound="FB4N1000">
        <notes>
          <body xmlns="http://www.w3.org/1999/xhtml">
            <p>SUBSYSTEM: Citric Acid Cycle</p>
          </body>
        </notes>
        <listOfReactants>
          <speciesReference species="M_cit_c" stoichiometry="1" constant="true"/>
        </listOfReactants>
        <listOfProducts>
          <speciesReference species="M_h2o_c" stoichiometry="1" constant="true"/>
          <speciesReference species="M_acn_c" stoichiometry="1" constant="true"/>
        </listOfProducts>
        <fbc:geneProductAssociation>
          <fbc:geneProductRef fbc:geneProduct="acn"/>
        </fbc:geneProductAssociation>
      </reaction>
      <reaction metaid="R_R_acnB" id="R_R_acnB" name="acnB" reversible="true" fast="false" fbc:lowerFluxBound="FB1N1000" fbc:upperFluxBound="FB4N1000">
        <notes>
          <body xmlns="http://www.w3.org/1999/xhtml">
            <p>SUBSYSTEM: Citric Acid Cycle</p>
          </body>
        </notes>
        <listOfReactants>
          <speciesReference species="M_h2o_c" stoichiometry="1" constant="true"/>
          <speciesReference species="M_acn_c" stoichiometry="1" constant="true"/>
        </listOfReactants>
        <listOfProducts>
          <speciesReference species="M_icit_c" stoichiometry="1" constant="true"/>
        </listOfProducts>
        <fbc:geneProductAssociation>
          <fbc:geneProductRef fbc:geneProduct="acn"/>
        </fbc:geneProductAssociation>
      </reaction>
      <reaction metaid="R_R_icd" id="R_R_icd" name="icd" reversible="true" fast="false" fbc:lowerFluxBound="FB1N1000" fbc:upperFluxBound="FB4N1000">
        <notes>
          <body xmlns="http://www.w3.org/1999/xhtml">
            <p>SUBSYSTEM: Citric Acid Cycle</p>
          </body>
        </notes>
        <listOfReactants>
          <speciesReference species="M_nadp_c" stoichiometry="1" constant="true"/>
          <speciesReference species="M_icit_c" stoichiometry="1" constant="true"/>
        </listOfReactants>
        <listOfProducts>
          <speciesReference species="M_h_c" stoichiometry="1" constant="true"/>
          <speciesReference species="M_nadph_c" stoichiometry="1" constant="true"/>
          <speciesReference species="M_co2_c" stoichiometry="1" constant="true"/>
          <speciesReference species="M_akg_c" stoichiometry="1" constant="true"/>
        </listOfProducts>
        <fbc:geneProductAssociation>
          <fbc:geneProductRef fbc:geneProduct="icd"/>
        </fbc:geneProductAssociation>
      </reaction>
      <reaction metaid="R_R_odhA" id="R_R_odhA" name="odhA" reversible="false" fast="false" fbc:lowerFluxBound="FB3N0" fbc:upperFluxBound="FB4N1000">
        <notes>
          <body xmlns="http://www.w3.org/1999/xhtml">
            <p>SUBSYSTEM: Citric Acid Cycle</p>
          </body>
        </notes>
        <listOfReactants>
          <speciesReference species="M_nad_c" stoichiometry="1" constant="true"/>
          <speciesReference species="M_coa_c" stoichiometry="1" constant="true"/>
          <speciesReference species="M_akg_c" stoichiometry="1" constant="true"/>
        </listOfReactants>
        <listOfProducts>
          <speciesReference species="M_h_c" stoichiometry="1" constant="true"/>
          <speciesReference species="M_nadh_c" stoichiometry="1" constant="true"/>
          <speciesReference species="M_co2_c" stoichiometry="1" constant="true"/>
          <speciesReference species="M_succoa_c" stoichiometry="1" constant="true"/>
        </listOfProducts>
        <fbc:geneProductAssociation>
          <fbc:geneProductRef fbc:geneProduct="odhA"/>
        </fbc:geneProductAssociation>
      </reaction>
      <reaction metaid="R_R_sucD" id="R_R_sucD" name="sucD" reversible="false" fast="false" fbc:lowerFluxBound="FB3N0" fbc:upperFluxBound="FB4N1000">
        <notes>
          <body xmlns="http://www.w3.org/1999/xhtml">
            <p>SUBSYSTEM: Citric Acid Cycle</p>
          </body>
        </notes>
        <listOfReactants>
          <speciesReference species="M_h_c" stoichiometry="3" constant="true"/>
          <speciesReference species="M_adp_c" stoichiometry="1" constant="true"/>
          <speciesReference species="M_pi_c" stoichiometry="1" constant="true"/>
          <speciesReference species="M_succoa_c" stoichiometry="1" constant="true"/>
        </listOfReactants>
        <listOfProducts>
          <speciesReference species="M_atp_c" stoichiometry="1" constant="true"/>
          <speciesReference species="M_coa_c" stoichiometry="1" constant="true"/>
          <speciesReference species="M_suc_c" stoichiometry="1" constant="true"/>
        </listOfProducts>
        <fbc:geneProductAssociation>
          <fbc:geneProductRef fbc:geneProduct="sucD"/>
        </fbc:geneProductAssociation>
      </reaction>
      <reaction metaid="R_R_sdhCAB" id="R_R_sdhCAB" name="sdhCAB" reversible="true" fast="false" fbc:lowerFluxBound="FB1N1000" fbc:upperFluxBound="FB4N1000">
        <notes>
          <body xmlns="http://www.w3.org/1999/xhtml">
            <p>SUBSYSTEM: Citric Acid Cycle</p>
          </body>
        </notes>
        <listOfReactants>
          <speciesReference species="M_h_e" stoichiometry="2" constant="true"/>
          <speciesReference species="M_q8_c" stoichiometry="1" constant="true"/>
          <speciesReference species="M_suc_c" stoichiometry="1" constant="true"/>
        </listOfReactants>
        <listOfProducts>
          <speciesReference species="M_h_c" stoichiometry="2" constant="true"/>
          <speciesReference species="M_q8h2_c" stoichiometry="1" constant="true"/>
          <speciesReference species="M_fum_c" stoichiometry="1" constant="true"/>
        </listOfProducts>
        <fbc:geneProductAssociation>
          <fbc:geneProductRef fbc:geneProduct="sdhCAB"/>
        </fbc:geneProductAssociation>
      </reaction>
      <reaction metaid="R_R_fumC" id="R_R_fumC" name="fumC" reversible="true" fast="false" fbc:lowerFluxBound="FB1N1000" fbc:upperFluxBound="FB4N1000">
        <notes>
          <body xmlns="http://www.w3.org/1999/xhtml">
            <p>SUBSYSTEM: Citric Acid Cycle</p>
          </body>
        </notes>
        <listOfReactants>
          <speciesReference species="M_h2o_c" stoichiometry="1" constant="true"/>
          <speciesReference species="M_fum_c" stoichiometry="1" constant="true"/>
        </listOfReactants>
        <listOfProducts>
          <speciesReference species="M_mal_L_c" stoichiometry="1" constant="true"/>
        </listOfProducts>
        <fbc:geneProductAssociation>
          <fbc:geneProductRef fbc:geneProduct="fumC"/>
        </fbc:geneProductAssociation>
      </reaction>
      <reaction metaid="R_R_mdh" id="R_R_mdh" name="mdh" reversible="false" fast="false" fbc:lowerFluxBound="FB3N0" fbc:upperFluxBound="FB4N1000">
        <notes>
          <body xmlns="http://www.w3.org/1999/xhtml">
            <p>SUBSYSTEM: Citric Acid Cycle</p>
          </body>
        </notes>
        <listOfReactants>
          <speciesReference species="M_h_c" stoichiometry="1" constant="true"/>
          <speciesReference species="M_nadh_c" stoichiometry="1" constant="true"/>
          <speciesReference species="M_oaa_c" stoichiometry="1" constant="true"/>
        </listOfReactants>
        <listOfProducts>
          <speciesReference species="M_nad_c" stoichiometry="1" constant="true"/>
          <speciesReference species="M_mal_L_c" stoichiometry="1" constant="true"/>
        </listOfProducts>
        <fbc:geneProductAssociation>
          <fbc:geneProductRef fbc:geneProduct="mdh"/>
        </fbc:geneProductAssociation>
      </reaction>
      <reaction metaid="R_R_aceA" id="R_R_aceA" name="aceA" reversible="false" fast="false" fbc:lowerFluxBound="FB3N0" fbc:upperFluxBound="FB3N0">
        <notes>
          <body xmlns="http://www.w3.org/1999/xhtml">
            <p>SUBSYSTEM: Anaplerotic reactions</p>
          </body>
        </notes>
        <listOfReactants>
          <speciesReference species="M_icit_c" stoichiometry="1" constant="true"/>
        </listOfReactants>
        <listOfProducts>
          <speciesReference species="M_suc_c" stoichiometry="1" constant="true"/>
          <speciesReference species="M_glx_c" stoichiometry="1" constant="true"/>
        </listOfProducts>
        <fbc:geneProductAssociation>
          <fbc:geneProductRef fbc:geneProduct="aceA"/>
        </fbc:geneProductAssociation>
      </reaction>
      <reaction metaid="R_R_aceB" id="R_R_aceB" name="aceB" reversible="false" fast="false" fbc:lowerFluxBound="FB3N0" fbc:upperFluxBound="FB3N0">
        <notes>
          <body xmlns="http://www.w3.org/1999/xhtml">
            <p>SUBSYSTEM: Anaplerotic reactions</p>
          </body>
        </notes>
        <listOfReactants>
          <speciesReference species="M_h2o_c" stoichiometry="1" constant="true"/>
          <speciesReference species="M_accoa_c" stoichiometry="1" constant="true"/>
          <speciesReference species="M_glx_c" stoichiometry="1" constant="true"/>
        </listOfReactants>
        <listOfProducts>
          <speciesReference species="M_mal_L_c" stoichiometry="1" constant="true"/>
          <speciesReference species="M_coa_c" stoichiometry="1" constant="true"/>
        </listOfProducts>
        <fbc:geneProductAssociation>
          <fbc:geneProductRef fbc:geneProduct="aceB"/>
        </fbc:geneProductAssociation>
      </reaction>
      <reaction metaid="R_R_pckG" id="R_R_pckG" name="pckG" reversible="false" fast="false" fbc:lowerFluxBound="FB3N0" fbc:upperFluxBound="FB4N1000">
        <notes>
          <body xmlns="http://www.w3.org/1999/xhtml">
            <p>SUBSYSTEM: Anaplerotic reactions</p>
          </body>
        </notes>
        <listOfReactants>
          <speciesReference species="M_oaa_c" stoichiometry="1" constant="true"/>
          <speciesReference species="M_gtp_c" stoichiometry="1" constant="true"/>
        </listOfReactants>
        <listOfProducts>
          <speciesReference species="M_pep_c" stoichiometry="1" constant="true"/>
          <speciesReference species="M_co2_c" stoichiometry="1" constant="true"/>
          <speciesReference species="M_gdp_c" stoichiometry="1" constant="true"/>
        </listOfProducts>
        <fbc:geneProductAssociation>
          <fbc:geneProductRef fbc:geneProduct="pckG"/>
        </fbc:geneProductAssociation>
      </reaction>
      <reaction metaid="R_R_ppc" id="R_R_ppc" name="ppc" reversible="false" fast="false" fbc:lowerFluxBound="FB3N0" fbc:upperFluxBound="FB4N1000">
        <notes>
          <body xmlns="http://www.w3.org/1999/xhtml">
            <p>SUBSYSTEM: Anaplerotic reactions</p>
          </body>
        </notes>
        <listOfReactants>
          <speciesReference species="M_h2o_c" stoichiometry="1" constant="true"/>
          <speciesReference species="M_pep_c" stoichiometry="1" constant="true"/>
          <speciesReference species="M_co2_c" stoichiometry="1" constant="true"/>
        </listOfReactants>
        <listOfProducts>
          <speciesReference species="M_h_c" stoichiometry="3" constant="true"/>
          <speciesReference species="M_pi_c" stoichiometry="1" constant="true"/>
          <speciesReference species="M_oaa_c" stoichiometry="1" constant="true"/>
        </listOfProducts>
        <fbc:geneProductAssociation>
          <fbc:geneProductRef fbc:geneProduct="ppc"/>
        </fbc:geneProductAssociation>
      </reaction>
      <reaction metaid="R_R_pyc" id="R_R_pyc" name="pyc" reversible="false" fast="false" fbc:lowerFluxBound="FB3N0" fbc:upperFluxBound="FB4N1000">
        <notes>
          <body xmlns="http://www.w3.org/1999/xhtml">
            <p>SUBSYSTEM: Anaplerotic reactions</p>
          </body>
        </notes>
        <listOfReactants>
          <speciesReference species="M_atp_c" stoichiometry="1" constant="true"/>
          <speciesReference species="M_pyr_c" stoichiometry="1" constant="true"/>
          <speciesReference species="M_hco3_c" stoichiometry="1" constant="true"/>
        </listOfReactants>
        <listOfProducts>
          <speciesReference species="M_h_c" stoichiometry="2" constant="true"/>
          <speciesReference species="M_adp_c" stoichiometry="1" constant="true"/>
          <speciesReference species="M_pi_c" stoichiometry="1" constant="true"/>
          <speciesReference species="M_oaa_c" stoichiometry="1" constant="true"/>
        </listOfProducts>
        <fbc:geneProductAssociation>
          <fbc:geneProductRef fbc:geneProduct="pyc"/>
        </fbc:geneProductAssociation>
      </reaction>
      <reaction metaid="R_R_HCO3E" id="R_R_HCO3E" name="HCO3E" reversible="true" fast="false" fbc:lowerFluxBound="FB1N1000" fbc:upperFluxBound="FB4N1000">
        <notes>
          <body xmlns="http://www.w3.org/1999/xhtml">
            <p>SUBSYSTEM: Unassigned</p>
          </body>
        </notes>
        <listOfReactants>
          <speciesReference species="M_h2o_c" stoichiometry="1" constant="true"/>
          <speciesReference species="M_co2_c" stoichiometry="1" constant="true"/>
        </listOfReactants>
        <listOfProducts>
          <speciesReference species="M_h_c" stoichiometry="1" constant="true"/>
          <speciesReference species="M_hco3_c" stoichiometry="1" constant="true"/>
        </listOfProducts>
        <fbc:geneProductAssociation>
          <fbc:or>
            <fbc:geneProductRef fbc:geneProduct="b0339"/>
            <fbc:geneProductRef fbc:geneProduct="b0126"/>
          </fbc:or>
        </fbc:geneProductAssociation>
      </reaction>
      <reaction metaid="R_R_zwf" id="R_R_zwf" name="zwf" reversible="false" fast="false" fbc:lowerFluxBound="FB3N0" fbc:upperFluxBound="FB4N1000">
        <notes>
          <body xmlns="http://www.w3.org/1999/xhtml">
            <p>SUBSYSTEM: Pentose Phosphate Pathway</p>
          </body>
        </notes>
        <listOfReactants>
          <speciesReference species="M_g6p_c" stoichiometry="1" constant="true"/>
          <speciesReference species="M_nadp_c" stoichiometry="1" constant="true"/>
        </listOfReactants>
        <listOfProducts>
          <speciesReference species="M_h_c" stoichiometry="1" constant="true"/>
          <speciesReference species="M_nadph_c" stoichiometry="1" constant="true"/>
          <speciesReference species="M_6pgl_c" stoichiometry="1" constant="true"/>
        </listOfProducts>
        <fbc:geneProductAssociation>
          <fbc:geneProductRef fbc:geneProduct="zwf"/>
        </fbc:geneProductAssociation>
      </reaction>
      <reaction metaid="R_R_opcA" id="R_R_opcA" name="opcA" reversible="false" fast="false" fbc:lowerFluxBound="FB3N0" fbc:upperFluxBound="FB4N1000">
        <notes>
          <body xmlns="http://www.w3.org/1999/xhtml">
            <p>SUBSYSTEM: Pentose Phosphate Pathway</p>
          </body>
        </notes>
        <listOfReactants>
          <speciesReference species="M_h2o_c" stoichiometry="1" constant="true"/>
          <speciesReference species="M_6pgl_c" stoichiometry="1" constant="true"/>
        </listOfReactants>
        <listOfProducts>
          <speciesReference species="M_6pgc_c" stoichiometry="1" constant="true"/>
        </listOfProducts>
        <fbc:geneProductAssociation>
          <fbc:geneProductRef fbc:geneProduct="opcA"/>
        </fbc:geneProductAssociation>
      </reaction>
      <reaction metaid="R_R_gnd" id="R_R_gnd" name="gnd" reversible="false" fast="false" fbc:lowerFluxBound="FB3N0" fbc:upperFluxBound="FB4N1000">
        <notes>
          <body xmlns="http://www.w3.org/1999/xhtml">
            <p>SUBSYSTEM: Pentose Phosphate Pathway</p>
          </body>
        </notes>
        <listOfReactants>
          <speciesReference species="M_nadp_c" stoichiometry="1" constant="true"/>
          <speciesReference species="M_6pgc_c" stoichiometry="1" constant="true"/>
        </listOfReactants>
        <listOfProducts>
          <speciesReference species="M_h_c" stoichiometry="1" constant="true"/>
          <speciesReference species="M_nadph_c" stoichiometry="1" constant="true"/>
          <speciesReference species="M_co2_c" stoichiometry="1" constant="true"/>
          <speciesReference species="M_ru5p_D_c" stoichiometry="1" constant="true"/>
        </listOfProducts>
        <fbc:geneProductAssociation>
          <fbc:geneProductRef fbc:geneProduct="gnd"/>
        </fbc:geneProductAssociation>
      </reaction>
      <reaction metaid="R_R_rpi" id="R_R_rpi" name="rpi" reversible="true" fast="false" fbc:lowerFluxBound="FB1N1000" fbc:upperFluxBound="FB4N1000">
        <notes>
          <body xmlns="http://www.w3.org/1999/xhtml">
            <p>SUBSYSTEM: Pentose Phosphate Pathway</p>
          </body>
        </notes>
        <listOfReactants>
          <speciesReference species="M_ru5p_D_c" stoichiometry="1" constant="true"/>
        </listOfReactants>
        <listOfProducts>
          <speciesReference species="M_r5p_c" stoichiometry="1" constant="true"/>
        </listOfProducts>
        <fbc:geneProductAssociation>
          <fbc:geneProductRef fbc:geneProduct="rpi"/>
        </fbc:geneProductAssociation>
      </reaction>
      <reaction metaid="R_R_rpe" id="R_R_rpe" name="rpe" reversible="true" fast="false" fbc:lowerFluxBound="FB1N1000" fbc:upperFluxBound="FB4N1000">
        <notes>
          <body xmlns="http://www.w3.org/1999/xhtml">
            <p>SUBSYSTEM: Pentose Phosphate Pathway</p>
          </body>
        </notes>
        <listOfReactants>
          <speciesReference species="M_ru5p_D_c" stoichiometry="1" constant="true"/>
        </listOfReactants>
        <listOfProducts>
          <speciesReference species="M_xu5p_D_c" stoichiometry="1" constant="true"/>
        </listOfProducts>
        <fbc:geneProductAssociation>
          <fbc:geneProductRef fbc:geneProduct="rpe"/>
        </fbc:geneProductAssociation>
      </reaction>
      <reaction metaid="R_R_tkt_1" id="R_R_tkt_1" name="tkt_1" reversible="true" fast="false" fbc:lowerFluxBound="FB1N1000" fbc:upperFluxBound="FB4N1000">
        <notes>
          <body xmlns="http://www.w3.org/1999/xhtml">
            <p>SUBSYSTEM: Pentose Phosphate Pathway</p>
          </body>
        </notes>
        <listOfReactants>
          <speciesReference species="M_r5p_c" stoichiometry="1" constant="true"/>
          <speciesReference species="M_xu5p_D_c" stoichiometry="1" constant="true"/>
        </listOfReactants>
        <listOfProducts>
          <speciesReference species="M_g3p_c" stoichiometry="1" constant="true"/>
          <speciesReference species="M_s7p_c" stoichiometry="1" constant="true"/>
        </listOfProducts>
        <fbc:geneProductAssociation>
          <fbc:geneProductRef fbc:geneProduct="tkt_1"/>
        </fbc:geneProductAssociation>
      </reaction>
      <reaction metaid="R_R_tal" id="R_R_tal" name="tal" reversible="true" fast="false" fbc:lowerFluxBound="FB1N1000" fbc:upperFluxBound="FB4N1000">
        <notes>
          <body xmlns="http://www.w3.org/1999/xhtml">
            <p>SUBSYSTEM: Pentose Phosphate Pathway</p>
          </body>
        </notes>
        <listOfReactants>
          <speciesReference species="M_g3p_c" stoichiometry="1" constant="true"/>
          <speciesReference species="M_s7p_c" stoichiometry="1" constant="true"/>
        </listOfReactants>
        <listOfProducts>
          <speciesReference species="M_f6p_c" stoichiometry="1" constant="true"/>
          <speciesReference species="M_e4p_c" stoichiometry="1" constant="true"/>
        </listOfProducts>
        <fbc:geneProductAssociation>
          <fbc:geneProductRef fbc:geneProduct="tal"/>
        </fbc:geneProductAssociation>
      </reaction>
      <reaction metaid="R_R_tkt_2" id="R_R_tkt_2" name="tkt_2" reversible="true" fast="false" fbc:lowerFluxBound="FB1N1000" fbc:upperFluxBound="FB4N1000">
        <notes>
          <body xmlns="http://www.w3.org/1999/xhtml">
            <p>SUBSYSTEM: Pentose Phosphate Pathway</p>
          </body>
        </notes>
        <listOfReactants>
          <speciesReference species="M_xu5p_D_c" stoichiometry="1" constant="true"/>
          <speciesReference species="M_e4p_c" stoichiometry="1" constant="true"/>
        </listOfReactants>
        <listOfProducts>
          <speciesReference species="M_f6p_c" stoichiometry="1" constant="true"/>
          <speciesReference species="M_g3p_c" stoichiometry="1" constant="true"/>
        </listOfProducts>
        <fbc:geneProductAssociation>
          <fbc:geneProductRef fbc:geneProduct="tkt_2"/>
        </fbc:geneProductAssociation>
      </reaction>
      <reaction metaid="R_R_cyto_bd_complex" id="R_R_cyto_bd_complex" name="cyto-bd-complex" reversible="false" fast="false" fbc:lowerFluxBound="FB3N0" fbc:upperFluxBound="FB4N1000">
        <notes>
          <body xmlns="http://www.w3.org/1999/xhtml">
            <p>SUBSYSTEM: Oxidative Phosphorylation</p>
          </body>
        </notes>
        <listOfReactants>
          <speciesReference species="M_h_c" stoichiometry="2" constant="true"/>
          <speciesReference species="M_q8h2_c" stoichiometry="1" constant="true"/>
          <speciesReference species="M_o2_c" stoichiometry="0.5" constant="true"/>
        </listOfReactants>
        <listOfProducts>
          <speciesReference species="M_h_e" stoichiometry="2" constant="true"/>
          <speciesReference species="M_h2o_c" stoichiometry="1" constant="true"/>
          <speciesReference species="M_q8_c" stoichiometry="1" constant="true"/>
        </listOfProducts>
        <fbc:geneProductAssociation>
          <fbc:and>
            <fbc:geneProductRef fbc:geneProduct="cydA"/>
            <fbc:geneProductRef fbc:geneProduct="cydB"/>
          </fbc:and>
        </fbc:geneProductAssociation>
      </reaction>
      <reaction metaid="R_R_ATPase" id="R_R_ATPase" name="ATPase" reversible="true" fast="false" fbc:lowerFluxBound="FB1N1000" fbc:upperFluxBound="FB4N1000">
        <notes>
          <body xmlns="http://www.w3.org/1999/xhtml">
            <p>SUBSYSTEM: </p>
          </body>
        </notes>
        <listOfReactants>
          <speciesReference species="M_h_e" stoichiometry="4" constant="true"/>
          <speciesReference species="M_adp_c" stoichiometry="1" constant="true"/>
          <speciesReference species="M_pi_c" stoichiometry="1" constant="true"/>
        </listOfReactants>
        <listOfProducts>
          <speciesReference species="M_h_c" stoichiometry="3" constant="true"/>
          <speciesReference species="M_atp_c" stoichiometry="1" constant="true"/>
          <speciesReference species="M_h2o_c" stoichiometry="1" constant="true"/>
        </listOfProducts>
        <fbc:geneProductAssociation/>
      </reaction>
      <reaction metaid="R_R_ndh" id="R_R_ndh" name="ndh" reversible="false" fast="false" fbc:lowerFluxBound="FB3N0" fbc:upperFluxBound="FB4N1000">
        <notes>
          <body xmlns="http://www.w3.org/1999/xhtml">
            <p>SUBSYSTEM: Oxidative Phosphorylation</p>
          </body>
        </notes>
        <listOfReactants>
          <speciesReference species="M_h_c" stoichiometry="1" constant="true"/>
          <speciesReference species="M_nadh_c" stoichiometry="1" constant="true"/>
          <speciesReference species="M_q8_c" stoichiometry="1" constant="true"/>
        </listOfReactants>
        <listOfProducts>
          <speciesReference species="M_nad_c" stoichiometry="1" constant="true"/>
          <speciesReference species="M_q8h2_c" stoichiometry="1" constant="true"/>
        </listOfProducts>
        <fbc:geneProductAssociation>
          <fbc:geneProductRef fbc:geneProduct="ndh"/>
        </fbc:geneProductAssociation>
      </reaction>
      <reaction metaid="R_R_trxB" id="R_R_trxB" name="trxB" reversible="false" fast="false" fbc:lowerFluxBound="FB3N0" fbc:upperFluxBound="FB4N1000">
        <notes>
          <body xmlns="http://www.w3.org/1999/xhtml">
            <p>SUBSYSTEM: Oxidative Phosphorylation</p>
          </body>
        </notes>
        <listOfReactants>
          <speciesReference species="M_h_c" stoichiometry="1" constant="true"/>
          <speciesReference species="M_nadph_c" stoichiometry="1" constant="true"/>
          <speciesReference species="M_trdox_c" stoichiometry="1" constant="true"/>
        </listOfReactants>
        <listOfProducts>
          <speciesReference species="M_nadp_c" stoichiometry="1" constant="true"/>
          <speciesReference species="M_trdrd_c" stoichiometry="1" constant="true"/>
        </listOfProducts>
        <fbc:geneProductAssociation>
          <fbc:geneProductRef fbc:geneProduct="trxB"/>
        </fbc:geneProductAssociation>
      </reaction>
      <reaction metaid="R_R_cysI" id="R_R_cysI" name="cysI" reversible="true" fast="false" fbc:lowerFluxBound="FB1N1000" fbc:upperFluxBound="FB4N1000">
        <notes>
          <body xmlns="http://www.w3.org/1999/xhtml">
            <p>SUBSYSTEM: Cysteine Metabolism</p>
          </body>
        </notes>
        <listOfReactants>
          <speciesReference species="M_h2o_c" stoichiometry="3" constant="true"/>
          <speciesReference species="M_nadp_c" stoichiometry="3" constant="true"/>
          <speciesReference species="M_h2s_c" stoichiometry="1" constant="true"/>
        </listOfReactants>
        <listOfProducts>
          <speciesReference species="M_h_c" stoichiometry="5" constant="true"/>
          <speciesReference species="M_nadph_c" stoichiometry="3" constant="true"/>
          <speciesReference species="M_so3_c" stoichiometry="1" constant="true"/>
        </listOfProducts>
        <fbc:geneProductAssociation>
          <fbc:geneProductRef fbc:geneProduct="cysI"/>
        </fbc:geneProductAssociation>
      </reaction>
      <reaction metaid="R_R_ppnK" id="R_R_ppnK" name="ppnK" reversible="true" fast="false" fbc:lowerFluxBound="FB1N1000" fbc:upperFluxBound="FB4N1000">
        <notes>
          <body xmlns="http://www.w3.org/1999/xhtml">
            <p>SUBSYSTEM: Cofactor and Prosthetic Group Biosynthesis</p>
          </body>
        </notes>
        <listOfReactants>
          <speciesReference species="M_atp_c" stoichiometry="1" constant="true"/>
          <speciesReference species="M_nad_c" stoichiometry="1" constant="true"/>
        </listOfReactants>
        <listOfProducts>
          <speciesReference species="M_adp_c" stoichiometry="1" constant="true"/>
          <speciesReference species="M_nadp_c" stoichiometry="1" constant="true"/>
        </listOfProducts>
        <fbc:geneProductAssociation>
          <fbc:geneProductRef fbc:geneProduct="ppnK"/>
        </fbc:geneProductAssociation>
      </reaction>
      <reaction metaid="R_R_mqo" id="R_R_mqo" name="mqo" reversible="false" fast="false" fbc:lowerFluxBound="FB3N0" fbc:upperFluxBound="FB4N1000">
        <notes>
          <body xmlns="http://www.w3.org/1999/xhtml">
            <p>SUBSYSTEM: Citric Acid Cycle</p>
          </body>
        </notes>
        <listOfReactants>
          <speciesReference species="M_mal_L_c" stoichiometry="1" constant="true"/>
          <speciesReference species="M_q8_c" stoichiometry="1" constant="true"/>
        </listOfReactants>
        <listOfProducts>
          <speciesReference species="M_q8h2_c" stoichiometry="1" constant="true"/>
          <speciesReference species="M_oaa_c" stoichiometry="1" constant="true"/>
        </listOfProducts>
        <fbc:geneProductAssociation>
          <fbc:geneProductRef fbc:geneProduct="mqo"/>
        </fbc:geneProductAssociation>
      </reaction>
      <reaction metaid="R_R_lldD" id="R_R_lldD" name="lldD" reversible="false" fast="false" fbc:lowerFluxBound="FB3N0" fbc:upperFluxBound="FB3N0">
        <notes>
          <body xmlns="http://www.w3.org/1999/xhtml">
            <p>SUBSYSTEM: Oxidative Phosphorylation</p>
          </body>
        </notes>
        <listOfReactants>
          <speciesReference species="M_lac_L_c" stoichiometry="1" constant="true"/>
          <speciesReference species="M_q8_c" stoichiometry="1" constant="true"/>
        </listOfReactants>
        <listOfProducts>
          <speciesReference species="M_pyr_c" stoichiometry="1" constant="true"/>
          <speciesReference species="M_q8h2_c" stoichiometry="1" constant="true"/>
        </listOfProducts>
        <fbc:geneProductAssociation>
          <fbc:geneProductRef fbc:geneProduct="lldD"/>
        </fbc:geneProductAssociation>
      </reaction>
      <reaction metaid="R_R_glpD" id="R_R_glpD" name="glpD" reversible="false" fast="false" fbc:lowerFluxBound="FB3N0" fbc:upperFluxBound="FB3N0">
        <notes>
          <body xmlns="http://www.w3.org/1999/xhtml">
            <p>SUBSYSTEM: Oxidative Phosphorylation</p>
          </body>
        </notes>
        <listOfReactants>
          <speciesReference species="M_q8_c" stoichiometry="1" constant="true"/>
          <speciesReference species="M_glyc3p_c" stoichiometry="1" constant="true"/>
        </listOfReactants>
        <listOfProducts>
          <speciesReference species="M_dhap_c" stoichiometry="1" constant="true"/>
          <speciesReference species="M_q8h2_c" stoichiometry="1" constant="true"/>
        </listOfProducts>
        <fbc:geneProductAssociation>
          <fbc:geneProductRef fbc:geneProduct="glpD"/>
        </fbc:geneProductAssociation>
      </reaction>
      <reaction metaid="R_R_putA" id="R_R_putA" name="putA" reversible="false" fast="false" fbc:lowerFluxBound="FB3N0" fbc:upperFluxBound="FB3N0">
        <notes>
          <body xmlns="http://www.w3.org/1999/xhtml">
            <p>SUBSYSTEM: Arginine and Proline Metabolism</p>
          </body>
        </notes>
        <listOfReactants>
          <speciesReference species="M_q8_c" stoichiometry="1" constant="true"/>
          <speciesReference species="M_pro_L_c" stoichiometry="1" constant="true"/>
        </listOfReactants>
        <listOfProducts>
          <speciesReference species="M_q8h2_c" stoichiometry="1" constant="true"/>
          <speciesReference species="M_1pyr5c_c" stoichiometry="1" constant="true"/>
        </listOfProducts>
        <fbc:geneProductAssociation>
          <fbc:geneProductRef fbc:geneProduct="putA"/>
        </fbc:geneProductAssociation>
      </reaction>
      <reaction metaid="R_R_narGHIJ" id="R_R_narGHIJ" name="narGHIJ" reversible="false" fast="false" fbc:lowerFluxBound="FB3N0" fbc:upperFluxBound="FB3N0">
        <notes>
          <body xmlns="http://www.w3.org/1999/xhtml">
            <p>SUBSYSTEM: Oxidative Phosphorylation</p>
          </body>
        </notes>
        <listOfReactants>
          <speciesReference species="M_h_c" stoichiometry="2" constant="true"/>
          <speciesReference species="M_q8h2_c" stoichiometry="1" constant="true"/>
          <speciesReference species="M_no3_c" stoichiometry="1" constant="true"/>
        </listOfReactants>
        <listOfProducts>
          <speciesReference species="M_h_e" stoichiometry="2" constant="true"/>
          <speciesReference species="M_h2o_c" stoichiometry="1" constant="true"/>
          <speciesReference species="M_q8_c" stoichiometry="1" constant="true"/>
          <speciesReference species="M_no2_c" stoichiometry="1" constant="true"/>
        </listOfProducts>
        <fbc:geneProductAssociation>
          <fbc:and>
            <fbc:geneProductRef fbc:geneProduct="narG"/>
            <fbc:geneProductRef fbc:geneProduct="narH"/>
            <fbc:geneProductRef fbc:geneProduct="narI"/>
            <fbc:geneProductRef fbc:geneProduct="narJ"/>
          </fbc:and>
        </fbc:geneProductAssociation>
      </reaction>
      <reaction metaid="R_R_accDA" id="R_R_accDA" name="accDA" reversible="false" fast="false" fbc:lowerFluxBound="FB3N0" fbc:upperFluxBound="FB4N1000">
        <notes>
          <body xmlns="http://www.w3.org/1999/xhtml">
            <p>SUBSYSTEM: Membrane Lipid Metabolism</p>
          </body>
        </notes>
        <listOfReactants>
          <speciesReference species="M_atp_c" stoichiometry="1" constant="true"/>
          <speciesReference species="M_accoa_c" stoichiometry="1" constant="true"/>
          <speciesReference species="M_hco3_c" stoichiometry="1" constant="true"/>
        </listOfReactants>
        <listOfProducts>
          <speciesReference species="M_h_c" stoichiometry="2" constant="true"/>
          <speciesReference species="M_adp_c" stoichiometry="1" constant="true"/>
          <speciesReference species="M_pi_c" stoichiometry="1" constant="true"/>
          <speciesReference species="M_malcoa_c" stoichiometry="1" constant="true"/>
        </listOfProducts>
        <fbc:geneProductAssociation>
          <fbc:geneProductRef fbc:geneProduct="accDA"/>
        </fbc:geneProductAssociation>
      </reaction>
      <reaction metaid="R_R_fas_IA_1" id="R_R_fas_IA_1" name="fas-IA_1" reversible="false" fast="false" fbc:lowerFluxBound="FB3N0" fbc:upperFluxBound="FB4N1000">
        <notes>
          <body xmlns="http://www.w3.org/1999/xhtml">
            <p>SUBSYSTEM: Membrane Lipid Metabolism</p>
          </body>
        </notes>
        <listOfReactants>
          <speciesReference species="M_h_c" stoichiometry="1" constant="true"/>
          <speciesReference species="M_accoa_c" stoichiometry="1" constant="true"/>
          <speciesReference species="M_ACP_c" stoichiometry="1" constant="true"/>
        </listOfReactants>
        <listOfProducts>
          <speciesReference species="M_coa_c" stoichiometry="1" constant="true"/>
          <speciesReference species="M_acACP_c" stoichiometry="1" constant="true"/>
        </listOfProducts>
        <fbc:geneProductAssociation>
          <fbc:geneProductRef fbc:geneProduct="fas__45__IA_1"/>
        </fbc:geneProductAssociation>
      </reaction>
      <reaction metaid="R_R_fas_IB_1" id="R_R_fas_IB_1" name="fas-IB_1" reversible="true" fast="false" fbc:lowerFluxBound="FB1N1000" fbc:upperFluxBound="FB4N1000">
        <notes>
          <body xmlns="http://www.w3.org/1999/xhtml">
            <p>SUBSYSTEM: Membrane Lipid Metabolism</p>
          </body>
        </notes>
        <listOfReactants>
          <speciesReference species="M_h_c" stoichiometry="1" constant="true"/>
          <speciesReference species="M_malcoa_c" stoichiometry="1" constant="true"/>
          <speciesReference species="M_ACP_c" stoichiometry="1" constant="true"/>
        </listOfReactants>
        <listOfProducts>
          <speciesReference species="M_coa_c" stoichiometry="1" constant="true"/>
          <speciesReference species="M_malACP_c" stoichiometry="1" constant="true"/>
        </listOfProducts>
        <fbc:geneProductAssociation>
          <fbc:geneProductRef fbc:geneProduct="fas__45__IB_1"/>
        </fbc:geneProductAssociation>
      </reaction>
      <reaction metaid="R_R_KAS14" id="R_R_KAS14" name="KAS14" reversible="false" fast="false" fbc:lowerFluxBound="FB3N0" fbc:upperFluxBound="FB4N1000">
        <notes>
          <body xmlns="http://www.w3.org/1999/xhtml">
            <p>SUBSYSTEM: Membrane Lipid Metabolism</p>
          </body>
        </notes>
        <listOfReactants>
          <speciesReference species="M_acACP_c" stoichiometry="1" constant="true"/>
          <speciesReference species="M_malACP_c" stoichiometry="1" constant="true"/>
        </listOfReactants>
        <listOfProducts>
          <speciesReference species="M_h_c" stoichiometry="1" constant="true"/>
          <speciesReference species="M_co2_c" stoichiometry="1" constant="true"/>
          <speciesReference species="M_ACP_c" stoichiometry="1" constant="true"/>
          <speciesReference species="M_actACP_c" stoichiometry="1" constant="true"/>
        </listOfProducts>
        <fbc:geneProductAssociation>
          <fbc:geneProductRef fbc:geneProduct="KAS14"/>
        </fbc:geneProductAssociation>
      </reaction>
      <reaction metaid="R_R_FASC140" id="R_R_FASC140" name="FASC140" reversible="false" fast="false" fbc:lowerFluxBound="FB3N0" fbc:upperFluxBound="FB4N1000">
        <notes>
          <body xmlns="http://www.w3.org/1999/xhtml">
            <p>SUBSYSTEM: Membrane Lipid Metabolism</p>
          </body>
        </notes>
        <listOfReactants>
          <speciesReference species="M_h_c" stoichiometry="17" constant="true"/>
          <speciesReference species="M_nadph_c" stoichiometry="12" constant="true"/>
          <speciesReference species="M_malACP_c" stoichiometry="5" constant="true"/>
          <speciesReference species="M_actACP_c" stoichiometry="1" constant="true"/>
        </listOfReactants>
        <listOfProducts>
          <speciesReference species="M_h2o_c" stoichiometry="6" constant="true"/>
          <speciesReference species="M_nadp_c" stoichiometry="12" constant="true"/>
          <speciesReference species="M_co2_c" stoichiometry="5" constant="true"/>
          <speciesReference species="M_ACP_c" stoichiometry="5" constant="true"/>
          <speciesReference species="M_C140ACP_c" stoichiometry="1" constant="true"/>
        </listOfProducts>
        <fbc:geneProductAssociation>
          <fbc:geneProductRef fbc:geneProduct="FASC140"/>
        </fbc:geneProductAssociation>
      </reaction>
      <reaction metaid="R_R_FASC150" id="R_R_FASC150" name="FASC150" reversible="false" fast="false" fbc:lowerFluxBound="FB3N0" fbc:upperFluxBound="FB4N1000">
        <notes>
          <body xmlns="http://www.w3.org/1999/xhtml">
            <p>SUBSYSTEM: Membrane Lipid Metabolism</p>
          </body>
        </notes>
        <listOfReactants>
          <speciesReference species="M_h_c" stoichiometry="18.5" constant="true"/>
          <speciesReference species="M_nadph_c" stoichiometry="13" constant="true"/>
          <speciesReference species="M_malACP_c" stoichiometry="5.5" constant="true"/>
          <speciesReference species="M_actACP_c" stoichiometry="1" constant="true"/>
        </listOfReactants>
        <listOfProducts>
          <speciesReference species="M_h2o_c" stoichiometry="6.5" constant="true"/>
          <speciesReference species="M_nadp_c" stoichiometry="13" constant="true"/>
          <speciesReference species="M_co2_c" stoichiometry="5.5" constant="true"/>
          <speciesReference species="M_ACP_c" stoichiometry="5.5" constant="true"/>
          <speciesReference species="M_C150ACP_c" stoichiometry="1" constant="true"/>
        </listOfProducts>
        <fbc:geneProductAssociation>
          <fbc:geneProductRef fbc:geneProduct="FASC150"/>
        </fbc:geneProductAssociation>
      </reaction>
      <reaction metaid="R_R_FASC160" id="R_R_FASC160" name="FASC160" reversible="false" fast="false" fbc:lowerFluxBound="FB3N0" fbc:upperFluxBound="FB4N1000">
        <notes>
          <body xmlns="http://www.w3.org/1999/xhtml">
            <p>SUBSYSTEM: Membrane Lipid Metabolism</p>
          </body>
        </notes>
        <listOfReactants>
          <speciesReference species="M_h_c" stoichiometry="20" constant="true"/>
          <speciesReference species="M_nadph_c" stoichiometry="14" constant="true"/>
          <speciesReference species="M_malACP_c" stoichiometry="6" constant="true"/>
          <speciesReference species="M_actACP_c" stoichiometry="1" constant="true"/>
        </listOfReactants>
        <listOfProducts>
          <speciesReference species="M_h2o_c" stoichiometry="7" constant="true"/>
          <speciesReference species="M_nadp_c" stoichiometry="14" constant="true"/>
          <speciesReference species="M_co2_c" stoichiometry="6" constant="true"/>
          <speciesReference species="M_ACP_c" stoichiometry="6" constant="true"/>
          <speciesReference species="M_C160ACP_c" stoichiometry="1" constant="true"/>
        </listOfProducts>
        <fbc:geneProductAssociation>
          <fbc:geneProductRef fbc:geneProduct="FASC160"/>
        </fbc:geneProductAssociation>
      </reaction>
      <reaction metaid="R_R_FASC180" id="R_R_FASC180" name="FASC180" reversible="false" fast="false" fbc:lowerFluxBound="FB3N0" fbc:upperFluxBound="FB4N1000">
        <notes>
          <body xmlns="http://www.w3.org/1999/xhtml">
            <p>SUBSYSTEM: Membrane Lipid Metabolism</p>
          </body>
        </notes>
        <listOfReactants>
          <speciesReference species="M_h_c" stoichiometry="23" constant="true"/>
          <speciesReference species="M_nadph_c" stoichiometry="16" constant="true"/>
          <speciesReference species="M_malACP_c" stoichiometry="7" constant="true"/>
          <speciesReference species="M_actACP_c" stoichiometry="1" constant="true"/>
        </listOfReactants>
        <listOfProducts>
          <speciesReference species="M_h2o_c" stoichiometry="8" constant="true"/>
          <speciesReference species="M_nadp_c" stoichiometry="16" constant="true"/>
          <speciesReference species="M_co2_c" stoichiometry="7" constant="true"/>
          <speciesReference species="M_ACP_c" stoichiometry="7" constant="true"/>
          <speciesReference species="M_C180ACP_c" stoichiometry="1" constant="true"/>
        </listOfProducts>
        <fbc:geneProductAssociation>
          <fbc:geneProductRef fbc:geneProduct="FASC180"/>
        </fbc:geneProductAssociation>
      </reaction>
      <reaction metaid="R_R_FASC161" id="R_R_FASC161" name="FASC161" reversible="false" fast="false" fbc:lowerFluxBound="FB3N0" fbc:upperFluxBound="FB4N1000">
        <notes>
          <body xmlns="http://www.w3.org/1999/xhtml">
            <p>SUBSYSTEM: Membrane Lipid Metabolism</p>
          </body>
        </notes>
        <listOfReactants>
          <speciesReference species="M_h_c" stoichiometry="19" constant="true"/>
          <speciesReference species="M_nadph_c" stoichiometry="13" constant="true"/>
          <speciesReference species="M_malACP_c" stoichiometry="6" constant="true"/>
          <speciesReference species="M_actACP_c" stoichiometry="1" constant="true"/>
        </listOfReactants>
        <listOfProducts>
          <speciesReference species="M_h2o_c" stoichiometry="7" constant="true"/>
          <speciesReference species="M_nadp_c" stoichiometry="13" constant="true"/>
          <speciesReference species="M_co2_c" stoichiometry="6" constant="true"/>
          <speciesReference species="M_ACP_c" stoichiometry="6" constant="true"/>
          <speciesReference species="M_C161ACP_c" stoichiometry="1" constant="true"/>
        </listOfProducts>
        <fbc:geneProductAssociation>
          <fbc:geneProductRef fbc:geneProduct="FASC161"/>
        </fbc:geneProductAssociation>
      </reaction>
      <reaction metaid="R_R_FASC181" id="R_R_FASC181" name="FASC181" reversible="false" fast="false" fbc:lowerFluxBound="FB3N0" fbc:upperFluxBound="FB4N1000">
        <notes>
          <body xmlns="http://www.w3.org/1999/xhtml">
            <p>SUBSYSTEM: Membrane Lipid Metabolism</p>
          </body>
        </notes>
        <listOfReactants>
          <speciesReference species="M_h_c" stoichiometry="22" constant="true"/>
          <speciesReference species="M_nadph_c" stoichiometry="15" constant="true"/>
          <speciesReference species="M_malACP_c" stoichiometry="7" constant="true"/>
          <speciesReference species="M_actACP_c" stoichiometry="1" constant="true"/>
        </listOfReactants>
        <listOfProducts>
          <speciesReference species="M_h2o_c" stoichiometry="8" constant="true"/>
          <speciesReference species="M_nadp_c" stoichiometry="15" constant="true"/>
          <speciesReference species="M_co2_c" stoichiometry="7" constant="true"/>
          <speciesReference species="M_ACP_c" stoichiometry="7" constant="true"/>
          <speciesReference species="M_C181ACP_c" stoichiometry="1" constant="true"/>
        </listOfProducts>
        <fbc:geneProductAssociation>
          <fbc:geneProductRef fbc:geneProduct="FASC181"/>
        </fbc:geneProductAssociation>
      </reaction>
      <reaction metaid="R_R_gpsA" id="R_R_gpsA" name="gpsA" reversible="false" fast="false" fbc:lowerFluxBound="FB3N0" fbc:upperFluxBound="FB4N1000">
        <notes>
          <body xmlns="http://www.w3.org/1999/xhtml">
            <p>SUBSYSTEM: Alternate Carbon Metabolism</p>
          </body>
        </notes>
        <listOfReactants>
          <speciesReference species="M_h_c" stoichiometry="1" constant="true"/>
          <speciesReference species="M_dhap_c" stoichiometry="1" constant="true"/>
          <speciesReference species="M_nadph_c" stoichiometry="1" constant="true"/>
        </listOfReactants>
        <listOfProducts>
          <speciesReference species="M_nadp_c" stoichiometry="1" constant="true"/>
          <speciesReference species="M_glyc3p_c" stoichiometry="1" constant="true"/>
        </listOfProducts>
        <fbc:geneProductAssociation>
          <fbc:geneProductRef fbc:geneProduct="gpsA"/>
        </fbc:geneProductAssociation>
      </reaction>
      <reaction metaid="R_R_pacs" id="R_R_pacs" name="pacs" reversible="false" fast="false" fbc:lowerFluxBound="FB3N0" fbc:upperFluxBound="FB4N1000">
        <notes>
          <body xmlns="http://www.w3.org/1999/xhtml">
            <p>SUBSYSTEM: Membrane Lipid Metabolism</p>
          </body>
        </notes>
        <listOfReactants>
          <speciesReference species="M_glyc3p_c" stoichiometry="1" constant="true"/>
          <speciesReference species="M_C140ACP_c" stoichiometry="0.004" constant="true"/>
          <speciesReference species="M_C160ACP_c" stoichiometry="0.438" constant="true"/>
          <speciesReference species="M_C180ACP_c" stoichiometry="0.01" constant="true"/>
          <speciesReference species="M_C161ACP_c" stoichiometry="0.004" constant="true"/>
          <speciesReference species="M_C181ACP_c" stoichiometry="0.544" constant="true"/>
        </listOfReactants>
        <listOfProducts>
          <speciesReference species="M_ACP_c" stoichiometry="1" constant="true"/>
          <speciesReference species="M_AGL3P_c" stoichiometry="1" constant="true"/>
        </listOfProducts>
        <fbc:geneProductAssociation>
          <fbc:geneProductRef fbc:geneProduct="Phospholipid__45__step"/>
        </fbc:geneProductAssociation>
      </reaction>
      <reaction metaid="R_R_plsC" id="R_R_plsC" name="plsC" reversible="false" fast="false" fbc:lowerFluxBound="FB3N0" fbc:upperFluxBound="FB4N1000">
        <notes>
          <body xmlns="http://www.w3.org/1999/xhtml">
            <p>SUBSYSTEM: Membrane Lipid Metabolism</p>
          </body>
        </notes>
        <listOfReactants>
          <speciesReference species="M_C140ACP_c" stoichiometry="0.004" constant="true"/>
          <speciesReference species="M_C160ACP_c" stoichiometry="0.438" constant="true"/>
          <speciesReference species="M_C180ACP_c" stoichiometry="0.01" constant="true"/>
          <speciesReference species="M_C161ACP_c" stoichiometry="0.004" constant="true"/>
          <speciesReference species="M_C181ACP_c" stoichiometry="0.544" constant="true"/>
          <speciesReference species="M_AGL3P_c" stoichiometry="1" constant="true"/>
        </listOfReactants>
        <listOfProducts>
          <speciesReference species="M_ACP_c" stoichiometry="1" constant="true"/>
          <speciesReference species="M_pa_EC_c" stoichiometry="1" constant="true"/>
        </listOfProducts>
        <fbc:geneProductAssociation>
          <fbc:geneProductRef fbc:geneProduct="plsC"/>
        </fbc:geneProductAssociation>
      </reaction>
      <reaction metaid="R_R_pgsA2" id="R_R_pgsA2" name="pgsA2" reversible="true" fast="false" fbc:lowerFluxBound="FB1N1000" fbc:upperFluxBound="FB4N1000">
        <notes>
          <body xmlns="http://www.w3.org/1999/xhtml">
            <p>SUBSYSTEM: Membrane Lipid Metabolism</p>
          </body>
        </notes>
        <listOfReactants>
          <speciesReference species="M_glyc3p_c" stoichiometry="1" constant="true"/>
          <speciesReference species="M_cdpdag_EC_c" stoichiometry="1" constant="true"/>
        </listOfReactants>
        <listOfProducts>
          <speciesReference species="M_cmp_c" stoichiometry="1" constant="true"/>
          <speciesReference species="M_pgp_EC_c" stoichiometry="1" constant="true"/>
        </listOfProducts>
        <fbc:geneProductAssociation>
          <fbc:geneProductRef fbc:geneProduct="pgsA2"/>
        </fbc:geneProductAssociation>
      </reaction>
      <reaction metaid="R_R_cdsB" id="R_R_cdsB" name="cdsB" reversible="false" fast="false" fbc:lowerFluxBound="FB3N0" fbc:upperFluxBound="FB3N0">
        <notes>
          <body xmlns="http://www.w3.org/1999/xhtml">
            <p>SUBSYSTEM: Membrane Lipid Metabolism</p>
          </body>
        </notes>
        <listOfReactants>
          <speciesReference species="M_cdpdag_EC_c" stoichiometry="1" constant="true"/>
          <speciesReference species="M_ser_L_c" stoichiometry="1" constant="true"/>
        </listOfReactants>
        <listOfProducts>
          <speciesReference species="M_cmp_c" stoichiometry="1" constant="true"/>
          <speciesReference species="M_ps_EC_c" stoichiometry="1" constant="true"/>
        </listOfProducts>
        <fbc:geneProductAssociation>
          <fbc:geneProductRef fbc:geneProduct="cdsB"/>
        </fbc:geneProductAssociation>
      </reaction>
      <reaction metaid="R_R_r2_7_8_a" id="R_R_r2_7_8_a" name="r2.7.8.a" reversible="false" fast="false" fbc:lowerFluxBound="FB3N0" fbc:upperFluxBound="FB4N1000">
        <notes>
          <body xmlns="http://www.w3.org/1999/xhtml">
            <p>SUBSYSTEM: Membrane Lipid Metabolism</p>
          </body>
        </notes>
        <listOfReactants>
          <speciesReference species="M_h2o_c" stoichiometry="1" constant="true"/>
          <speciesReference species="M_pgp_EC_c" stoichiometry="1" constant="true"/>
        </listOfReactants>
        <listOfProducts>
          <speciesReference species="M_pi_c" stoichiometry="1" constant="true"/>
          <speciesReference species="M_pg_EC_c" stoichiometry="1" constant="true"/>
        </listOfProducts>
        <fbc:geneProductAssociation>
          <fbc:geneProductRef fbc:geneProduct="r2__46__7__46__8__46__a"/>
        </fbc:geneProductAssociation>
      </reaction>
      <reaction metaid="R_R_prsA" id="R_R_prsA" name="prsA" reversible="false" fast="false" fbc:lowerFluxBound="FB3N0" fbc:upperFluxBound="FB4N1000">
        <notes>
          <body xmlns="http://www.w3.org/1999/xhtml">
            <p>SUBSYSTEM: Histidine Metabolism</p>
          </body>
        </notes>
        <listOfReactants>
          <speciesReference species="M_atp_c" stoichiometry="1" constant="true"/>
          <speciesReference species="M_r5p_c" stoichiometry="1" constant="true"/>
        </listOfReactants>
        <listOfProducts>
          <speciesReference species="M_amp_c" stoichiometry="1" constant="true"/>
          <speciesReference species="M_prpp_c" stoichiometry="1" constant="true"/>
        </listOfProducts>
        <fbc:geneProductAssociation>
          <fbc:geneProductRef fbc:geneProduct="prs"/>
        </fbc:geneProductAssociation>
      </reaction>
      <reaction metaid="R_R_purF" id="R_R_purF" name="purF" reversible="false" fast="false" fbc:lowerFluxBound="FB3N0" fbc:upperFluxBound="FB4N1000">
        <notes>
          <body xmlns="http://www.w3.org/1999/xhtml">
            <p>SUBSYSTEM: Purine and Pyrimidine Biosynthesis</p>
          </body>
        </notes>
        <listOfReactants>
          <speciesReference species="M_h2o_c" stoichiometry="1" constant="true"/>
          <speciesReference species="M_prpp_c" stoichiometry="1" constant="true"/>
          <speciesReference species="M_gln_L_c" stoichiometry="1" constant="true"/>
        </listOfReactants>
        <listOfProducts>
          <speciesReference species="M_glu_L_c" stoichiometry="1" constant="true"/>
          <speciesReference species="M_ppi_c" stoichiometry="1" constant="true"/>
          <speciesReference species="M_pram_c" stoichiometry="1" constant="true"/>
        </listOfProducts>
        <fbc:geneProductAssociation>
          <fbc:geneProductRef fbc:geneProduct="purF"/>
        </fbc:geneProductAssociation>
      </reaction>
      <reaction metaid="R_R_purD" id="R_R_purD" name="purD" reversible="false" fast="false" fbc:lowerFluxBound="FB3N0" fbc:upperFluxBound="FB4N1000">
        <notes>
          <body xmlns="http://www.w3.org/1999/xhtml">
            <p>SUBSYSTEM: Purine and Pyrimidine Biosynthesis</p>
          </body>
        </notes>
        <listOfReactants>
          <speciesReference species="M_atp_c" stoichiometry="1" constant="true"/>
          <speciesReference species="M_pram_c" stoichiometry="1" constant="true"/>
          <speciesReference species="M_gly_c" stoichiometry="1" constant="true"/>
        </listOfReactants>
        <listOfProducts>
          <speciesReference species="M_h_c" stoichiometry="3" constant="true"/>
          <speciesReference species="M_adp_c" stoichiometry="1" constant="true"/>
          <speciesReference species="M_pi_c" stoichiometry="1" constant="true"/>
          <speciesReference species="M_gar_c" stoichiometry="1" constant="true"/>
        </listOfProducts>
        <fbc:geneProductAssociation>
          <fbc:geneProductRef fbc:geneProduct="purD"/>
        </fbc:geneProductAssociation>
      </reaction>
      <reaction metaid="R_R_purN" id="R_R_purN" name="purN" reversible="false" fast="false" fbc:lowerFluxBound="FB3N0" fbc:upperFluxBound="FB4N1000">
        <notes>
          <body xmlns="http://www.w3.org/1999/xhtml">
            <p>SUBSYSTEM: Purine and Pyrimidine Biosynthesis</p>
          </body>
        </notes>
        <listOfReactants>
          <speciesReference species="M_gar_c" stoichiometry="1" constant="true"/>
          <speciesReference species="M_10fthf_c" stoichiometry="1" constant="true"/>
        </listOfReactants>
        <listOfProducts>
          <speciesReference species="M_fgam_c" stoichiometry="1" constant="true"/>
          <speciesReference species="M_thf_c" stoichiometry="1" constant="true"/>
        </listOfProducts>
        <fbc:geneProductAssociation>
          <fbc:geneProductRef fbc:geneProduct="purN"/>
        </fbc:geneProductAssociation>
      </reaction>
      <reaction metaid="R_R_purLQS" id="R_R_purLQS" name="purLQS" reversible="true" fast="false" fbc:lowerFluxBound="FB1N1000" fbc:upperFluxBound="FB4N1000">
        <notes>
          <body xmlns="http://www.w3.org/1999/xhtml">
            <p>SUBSYSTEM: Purine and Pyrimidine Biosynthesis</p>
          </body>
        </notes>
        <listOfReactants>
          <speciesReference species="M_atp_c" stoichiometry="1" constant="true"/>
          <speciesReference species="M_h2o_c" stoichiometry="1" constant="true"/>
          <speciesReference species="M_gln_L_c" stoichiometry="1" constant="true"/>
          <speciesReference species="M_fgam_c" stoichiometry="1" constant="true"/>
        </listOfReactants>
        <listOfProducts>
          <speciesReference species="M_h_c" stoichiometry="3" constant="true"/>
          <speciesReference species="M_adp_c" stoichiometry="1" constant="true"/>
          <speciesReference species="M_pi_c" stoichiometry="1" constant="true"/>
          <speciesReference species="M_glu_L_c" stoichiometry="1" constant="true"/>
          <speciesReference species="M_fpram_c" stoichiometry="1" constant="true"/>
        </listOfProducts>
        <fbc:geneProductAssociation>
          <fbc:geneProductRef fbc:geneProduct="purL"/>
        </fbc:geneProductAssociation>
      </reaction>
      <reaction metaid="R_R_purM" id="R_R_purM" name="purM" reversible="false" fast="false" fbc:lowerFluxBound="FB3N0" fbc:upperFluxBound="FB4N1000">
        <notes>
          <body xmlns="http://www.w3.org/1999/xhtml">
            <p>SUBSYSTEM: Purine and Pyrimidine Biosynthesis</p>
          </body>
        </notes>
        <listOfReactants>
          <speciesReference species="M_atp_c" stoichiometry="1" constant="true"/>
          <speciesReference species="M_fpram_c" stoichiometry="1" constant="true"/>
        </listOfReactants>
        <listOfProducts>
          <speciesReference species="M_h_c" stoichiometry="3" constant="true"/>
          <speciesReference species="M_adp_c" stoichiometry="1" constant="true"/>
          <speciesReference species="M_pi_c" stoichiometry="1" constant="true"/>
          <speciesReference species="M_air_c" stoichiometry="1" constant="true"/>
        </listOfProducts>
        <fbc:geneProductAssociation>
          <fbc:geneProductRef fbc:geneProduct="purM"/>
        </fbc:geneProductAssociation>
      </reaction>
      <reaction metaid="R_R_purC" id="R_R_purC" name="purC" reversible="true" fast="false" fbc:lowerFluxBound="FB1N1000" fbc:upperFluxBound="FB4N1000">
        <notes>
          <body xmlns="http://www.w3.org/1999/xhtml">
            <p>SUBSYSTEM: Purine and Pyrimidine Biosynthesis</p>
          </body>
        </notes>
        <listOfReactants>
          <speciesReference species="M_atp_c" stoichiometry="1" constant="true"/>
          <speciesReference species="M_5aizc_c" stoichiometry="1" constant="true"/>
          <speciesReference species="M_asp_L_c" stoichiometry="1" constant="true"/>
        </listOfReactants>
        <listOfProducts>
          <speciesReference species="M_h_c" stoichiometry="3" constant="true"/>
          <speciesReference species="M_adp_c" stoichiometry="1" constant="true"/>
          <speciesReference species="M_pi_c" stoichiometry="1" constant="true"/>
          <speciesReference species="M_25aics_c" stoichiometry="1" constant="true"/>
        </listOfProducts>
        <fbc:geneProductAssociation>
          <fbc:geneProductRef fbc:geneProduct="purC"/>
        </fbc:geneProductAssociation>
      </reaction>
      <reaction metaid="R_R_purB_1" id="R_R_purB_1" name="purB_1" reversible="true" fast="false" fbc:lowerFluxBound="FB1N1000" fbc:upperFluxBound="FB4N1000">
        <notes>
          <body xmlns="http://www.w3.org/1999/xhtml">
            <p>SUBSYSTEM: Purine and Pyrimidine Biosynthesis</p>
          </body>
        </notes>
        <listOfReactants>
          <speciesReference species="M_25aics_c" stoichiometry="1" constant="true"/>
        </listOfReactants>
        <listOfProducts>
          <speciesReference species="M_fum_c" stoichiometry="1" constant="true"/>
          <speciesReference species="M_aicar_c" stoichiometry="1" constant="true"/>
        </listOfProducts>
        <fbc:geneProductAssociation>
          <fbc:geneProductRef fbc:geneProduct="purB_1"/>
        </fbc:geneProductAssociation>
      </reaction>
      <reaction metaid="R_R_purH_1" id="R_R_purH_1" name="purH_1" reversible="true" fast="false" fbc:lowerFluxBound="FB1N1000" fbc:upperFluxBound="FB4N1000">
        <notes>
          <body xmlns="http://www.w3.org/1999/xhtml">
            <p>SUBSYSTEM: Purine and Pyrimidine Biosynthesis</p>
          </body>
        </notes>
        <listOfReactants>
          <speciesReference species="M_10fthf_c" stoichiometry="1" constant="true"/>
          <speciesReference species="M_aicar_c" stoichiometry="1" constant="true"/>
        </listOfReactants>
        <listOfProducts>
          <speciesReference species="M_thf_c" stoichiometry="1" constant="true"/>
          <speciesReference species="M_fprica_c" stoichiometry="1" constant="true"/>
        </listOfProducts>
        <fbc:geneProductAssociation>
          <fbc:geneProductRef fbc:geneProduct="purH"/>
        </fbc:geneProductAssociation>
      </reaction>
      <reaction metaid="R_R_purH_2" id="R_R_purH_2" name="purH_2" reversible="true" fast="false" fbc:lowerFluxBound="FB1N1000" fbc:upperFluxBound="FB4N1000">
        <notes>
          <body xmlns="http://www.w3.org/1999/xhtml">
            <p>SUBSYSTEM: Purine and Pyrimidine Biosynthesis</p>
          </body>
        </notes>
        <listOfReactants>
          <speciesReference species="M_h2o_c" stoichiometry="1" constant="true"/>
          <speciesReference species="M_imp_c" stoichiometry="1" constant="true"/>
        </listOfReactants>
        <listOfProducts>
          <speciesReference species="M_fprica_c" stoichiometry="1" constant="true"/>
        </listOfProducts>
        <fbc:geneProductAssociation>
          <fbc:geneProductRef fbc:geneProduct="r3__46__5__46__4__46__10"/>
        </fbc:geneProductAssociation>
      </reaction>
      <reaction metaid="R_R_purA" id="R_R_purA" name="purA" reversible="true" fast="false" fbc:lowerFluxBound="FB1N1000" fbc:upperFluxBound="FB4N1000">
        <notes>
          <body xmlns="http://www.w3.org/1999/xhtml">
            <p>SUBSYSTEM: Purine and Pyrimidine Biosynthesis</p>
          </body>
        </notes>
        <listOfReactants>
          <speciesReference species="M_gtp_c" stoichiometry="1" constant="true"/>
          <speciesReference species="M_asp_L_c" stoichiometry="1" constant="true"/>
          <speciesReference species="M_imp_c" stoichiometry="1" constant="true"/>
        </listOfReactants>
        <listOfProducts>
          <speciesReference species="M_h_c" stoichiometry="3" constant="true"/>
          <speciesReference species="M_pi_c" stoichiometry="1" constant="true"/>
          <speciesReference species="M_gdp_c" stoichiometry="1" constant="true"/>
          <speciesReference species="M_dcamp_c" stoichiometry="1" constant="true"/>
        </listOfProducts>
        <fbc:geneProductAssociation>
          <fbc:geneProductRef fbc:geneProduct="purA"/>
        </fbc:geneProductAssociation>
      </reaction>
      <reaction metaid="R_R_purB_2" id="R_R_purB_2" name="purB_2" reversible="true" fast="false" fbc:lowerFluxBound="FB1N1000" fbc:upperFluxBound="FB4N1000">
        <notes>
          <body xmlns="http://www.w3.org/1999/xhtml">
            <p>SUBSYSTEM: Purine and Pyrimidine Biosynthesis</p>
          </body>
        </notes>
        <listOfReactants>
          <speciesReference species="M_dcamp_c" stoichiometry="1" constant="true"/>
        </listOfReactants>
        <listOfProducts>
          <speciesReference species="M_amp_c" stoichiometry="1" constant="true"/>
          <speciesReference species="M_fum_c" stoichiometry="1" constant="true"/>
        </listOfProducts>
        <fbc:geneProductAssociation>
          <fbc:geneProductRef fbc:geneProduct="purB_2"/>
        </fbc:geneProductAssociation>
      </reaction>
      <reaction metaid="R_R_guaB1" id="R_R_guaB1" name="guaB1" reversible="false" fast="false" fbc:lowerFluxBound="FB3N0" fbc:upperFluxBound="FB4N1000">
        <notes>
          <body xmlns="http://www.w3.org/1999/xhtml">
            <p>SUBSYSTEM: Purine and Pyrimidine Biosynthesis</p>
          </body>
        </notes>
        <listOfReactants>
          <speciesReference species="M_h2o_c" stoichiometry="1" constant="true"/>
          <speciesReference species="M_nad_c" stoichiometry="1" constant="true"/>
          <speciesReference species="M_imp_c" stoichiometry="1" constant="true"/>
        </listOfReactants>
        <listOfProducts>
          <speciesReference species="M_h_c" stoichiometry="1" constant="true"/>
          <speciesReference species="M_nadh_c" stoichiometry="1" constant="true"/>
          <speciesReference species="M_xmp_c" stoichiometry="1" constant="true"/>
        </listOfProducts>
        <fbc:geneProductAssociation>
          <fbc:geneProductRef fbc:geneProduct="guaB1"/>
        </fbc:geneProductAssociation>
      </reaction>
      <reaction metaid="R_R_guaA" id="R_R_guaA" name="guaA" reversible="true" fast="false" fbc:lowerFluxBound="FB1N1000" fbc:upperFluxBound="FB4N1000">
        <notes>
          <body xmlns="http://www.w3.org/1999/xhtml">
            <p>SUBSYSTEM: Purine and Pyrimidine Biosynthesis</p>
          </body>
        </notes>
        <listOfReactants>
          <speciesReference species="M_atp_c" stoichiometry="1" constant="true"/>
          <speciesReference species="M_h2o_c" stoichiometry="1" constant="true"/>
          <speciesReference species="M_gln_L_c" stoichiometry="1" constant="true"/>
          <speciesReference species="M_xmp_c" stoichiometry="1" constant="true"/>
        </listOfReactants>
        <listOfProducts>
          <speciesReference species="M_amp_c" stoichiometry="1" constant="true"/>
          <speciesReference species="M_glu_L_c" stoichiometry="1" constant="true"/>
          <speciesReference species="M_ppi_c" stoichiometry="1" constant="true"/>
          <speciesReference species="M_gmp_c" stoichiometry="1" constant="true"/>
        </listOfProducts>
        <fbc:geneProductAssociation>
          <fbc:geneProductRef fbc:geneProduct="guaA"/>
        </fbc:geneProductAssociation>
      </reaction>
      <reaction metaid="R_R_ndk_2" id="R_R_ndk_2" name="ndk_2" reversible="false" fast="false" fbc:lowerFluxBound="FB3N0" fbc:upperFluxBound="FB4N1000">
        <notes>
          <body xmlns="http://www.w3.org/1999/xhtml">
            <p>SUBSYSTEM: Nucleotide Salvage Pathway</p>
          </body>
        </notes>
        <listOfReactants>
          <speciesReference species="M_atp_c" stoichiometry="1" constant="true"/>
          <speciesReference species="M_gdp_c" stoichiometry="1" constant="true"/>
        </listOfReactants>
        <listOfProducts>
          <speciesReference species="M_adp_c" stoichiometry="1" constant="true"/>
          <speciesReference species="M_gtp_c" stoichiometry="1" constant="true"/>
        </listOfProducts>
        <fbc:geneProductAssociation>
          <fbc:geneProductRef fbc:geneProduct="ndk_2"/>
        </fbc:geneProductAssociation>
      </reaction>
      <reaction metaid="R_R_gmk_1" id="R_R_gmk_1" name="gmk_1" reversible="false" fast="false" fbc:lowerFluxBound="FB3N0" fbc:upperFluxBound="FB4N1000">
        <notes>
          <body xmlns="http://www.w3.org/1999/xhtml">
            <p>SUBSYSTEM: Nucleotide Salvage Pathway</p>
          </body>
        </notes>
        <listOfReactants>
          <speciesReference species="M_atp_c" stoichiometry="1" constant="true"/>
          <speciesReference species="M_gmp_c" stoichiometry="1" constant="true"/>
        </listOfReactants>
        <listOfProducts>
          <speciesReference species="M_adp_c" stoichiometry="1" constant="true"/>
          <speciesReference species="M_gdp_c" stoichiometry="1" constant="true"/>
        </listOfProducts>
        <fbc:geneProductAssociation>
          <fbc:geneProductRef fbc:geneProduct="gmk_1"/>
        </fbc:geneProductAssociation>
      </reaction>
      <reaction metaid="R_R_ndk_1" id="R_R_ndk_1" name="ndk_1" reversible="true" fast="false" fbc:lowerFluxBound="FB1N1000" fbc:upperFluxBound="FB4N1000">
        <notes>
          <body xmlns="http://www.w3.org/1999/xhtml">
            <p>SUBSYSTEM: Nucleotide Salvage Pathway</p>
          </body>
        </notes>
        <listOfReactants>
          <speciesReference species="M_atp_c" stoichiometry="1" constant="true"/>
          <speciesReference species="M_dadp_c" stoichiometry="1" constant="true"/>
        </listOfReactants>
        <listOfProducts>
          <speciesReference species="M_adp_c" stoichiometry="1" constant="true"/>
          <speciesReference species="M_datp_c" stoichiometry="1" constant="true"/>
        </listOfProducts>
        <fbc:geneProductAssociation>
          <fbc:geneProductRef fbc:geneProduct="ndk_1"/>
        </fbc:geneProductAssociation>
      </reaction>
      <reaction metaid="R_R_ndk_3" id="R_R_ndk_3" name="ndk_3" reversible="true" fast="false" fbc:lowerFluxBound="FB1N1000" fbc:upperFluxBound="FB4N1000">
        <notes>
          <body xmlns="http://www.w3.org/1999/xhtml">
            <p>SUBSYSTEM: Nucleotide Salvage Pathway</p>
          </body>
        </notes>
        <listOfReactants>
          <speciesReference species="M_atp_c" stoichiometry="1" constant="true"/>
          <speciesReference species="M_dgdp_c" stoichiometry="1" constant="true"/>
        </listOfReactants>
        <listOfProducts>
          <speciesReference species="M_adp_c" stoichiometry="1" constant="true"/>
          <speciesReference species="M_dgtp_c" stoichiometry="1" constant="true"/>
        </listOfProducts>
        <fbc:geneProductAssociation>
          <fbc:geneProductRef fbc:geneProduct="ndk_3"/>
        </fbc:geneProductAssociation>
      </reaction>
      <reaction metaid="R_R_purE" id="R_R_purE" name="purE" reversible="true" fast="false" fbc:lowerFluxBound="FB1N1000" fbc:upperFluxBound="FB4N1000">
        <notes>
          <body xmlns="http://www.w3.org/1999/xhtml">
            <p>SUBSYSTEM: Purine and Pyrimidine Biosynthesis</p>
          </body>
        </notes>
        <listOfReactants>
          <speciesReference species="M_5aizc_c" stoichiometry="1" constant="true"/>
        </listOfReactants>
        <listOfProducts>
          <speciesReference species="M_5caiz_c" stoichiometry="1" constant="true"/>
        </listOfProducts>
        <fbc:geneProductAssociation>
          <fbc:geneProductRef fbc:geneProduct="AIRC3"/>
        </fbc:geneProductAssociation>
      </reaction>
      <reaction metaid="R_R_adk_1" id="R_R_adk_1" name="adk_1" reversible="false" fast="false" fbc:lowerFluxBound="FB3N0" fbc:upperFluxBound="FB4N1000">
        <notes>
          <body xmlns="http://www.w3.org/1999/xhtml">
            <p>SUBSYSTEM: Nucleotide Salvage Pathway</p>
          </body>
        </notes>
        <listOfReactants>
          <speciesReference species="M_atp_c" stoichiometry="1" constant="true"/>
          <speciesReference species="M_amp_c" stoichiometry="1" constant="true"/>
        </listOfReactants>
        <listOfProducts>
          <speciesReference species="M_adp_c" stoichiometry="2" constant="true"/>
        </listOfProducts>
        <fbc:geneProductAssociation>
          <fbc:geneProductRef fbc:geneProduct="adk_1"/>
        </fbc:geneProductAssociation>
      </reaction>
      <reaction metaid="R_R_nrdD_2" id="R_R_nrdD_2" name="nrdD_2" reversible="false" fast="false" fbc:lowerFluxBound="FB3N0" fbc:upperFluxBound="FB4N1000">
        <notes>
          <body xmlns="http://www.w3.org/1999/xhtml">
            <p>SUBSYSTEM: Nucleotide Salvage Pathway</p>
          </body>
        </notes>
        <listOfReactants>
          <speciesReference species="M_gtp_c" stoichiometry="1" constant="true"/>
          <speciesReference species="M_trdrd_c" stoichiometry="1" constant="true"/>
        </listOfReactants>
        <listOfProducts>
          <speciesReference species="M_h2o_c" stoichiometry="1" constant="true"/>
          <speciesReference species="M_trdox_c" stoichiometry="1" constant="true"/>
          <speciesReference species="M_dgtp_c" stoichiometry="1" constant="true"/>
        </listOfProducts>
        <fbc:geneProductAssociation>
          <fbc:geneProductRef fbc:geneProduct="nrdD_2"/>
        </fbc:geneProductAssociation>
      </reaction>
      <reaction metaid="R_R_purK" id="R_R_purK" name="purK" reversible="true" fast="false" fbc:lowerFluxBound="FB1N1000" fbc:upperFluxBound="FB4N1000">
        <notes>
          <body xmlns="http://www.w3.org/1999/xhtml">
            <p>SUBSYSTEM: Purine and Pyrimidine Biosynthesis</p>
          </body>
        </notes>
        <listOfReactants>
          <speciesReference species="M_atp_c" stoichiometry="1" constant="true"/>
          <speciesReference species="M_h2o_c" stoichiometry="1" constant="true"/>
          <speciesReference species="M_co2_c" stoichiometry="1" constant="true"/>
          <speciesReference species="M_air_c" stoichiometry="1" constant="true"/>
        </listOfReactants>
        <listOfProducts>
          <speciesReference species="M_h_c" stoichiometry="3" constant="true"/>
          <speciesReference species="M_adp_c" stoichiometry="1" constant="true"/>
          <speciesReference species="M_pi_c" stoichiometry="1" constant="true"/>
          <speciesReference species="M_5aizc_c" stoichiometry="1" constant="true"/>
        </listOfProducts>
        <fbc:geneProductAssociation>
          <fbc:geneProductRef fbc:geneProduct="purK"/>
        </fbc:geneProductAssociation>
      </reaction>
      <reaction metaid="R_R_nrdF_10" id="R_R_nrdF_10" name="nrdF_10" reversible="false" fast="false" fbc:lowerFluxBound="FB3N0" fbc:upperFluxBound="FB4N1000">
        <notes>
          <body xmlns="http://www.w3.org/1999/xhtml">
            <p>SUBSYSTEM: Nucleotide Salvage Pathway</p>
          </body>
        </notes>
        <listOfReactants>
          <speciesReference species="M_trdrd_c" stoichiometry="1" constant="true"/>
          <speciesReference species="M_cdp_c" stoichiometry="1" constant="true"/>
        </listOfReactants>
        <listOfProducts>
          <speciesReference species="M_h2o_c" stoichiometry="1" constant="true"/>
          <speciesReference species="M_trdox_c" stoichiometry="1" constant="true"/>
          <speciesReference species="M_dcdp_c" stoichiometry="1" constant="true"/>
        </listOfProducts>
        <fbc:geneProductAssociation>
          <fbc:geneProductRef fbc:geneProduct="nrdF_10"/>
        </fbc:geneProductAssociation>
      </reaction>
      <reaction metaid="R_R_nrdF_4" id="R_R_nrdF_4" name="nrdF_4" reversible="false" fast="false" fbc:lowerFluxBound="FB3N0" fbc:upperFluxBound="FB4N1000">
        <notes>
          <body xmlns="http://www.w3.org/1999/xhtml">
            <p>SUBSYSTEM: Nucleotide Salvage Pathway</p>
          </body>
        </notes>
        <listOfReactants>
          <speciesReference species="M_trdrd_c" stoichiometry="1" constant="true"/>
          <speciesReference species="M_udp_c" stoichiometry="1" constant="true"/>
        </listOfReactants>
        <listOfProducts>
          <speciesReference species="M_h2o_c" stoichiometry="1" constant="true"/>
          <speciesReference species="M_trdox_c" stoichiometry="1" constant="true"/>
          <speciesReference species="M_dudp_c" stoichiometry="1" constant="true"/>
        </listOfProducts>
        <fbc:geneProductAssociation>
          <fbc:geneProductRef fbc:geneProduct="nrdF_4"/>
        </fbc:geneProductAssociation>
      </reaction>
      <reaction metaid="R_R_ndk_12" id="R_R_ndk_12" name="ndk_12" reversible="true" fast="false" fbc:lowerFluxBound="FB1N1000" fbc:upperFluxBound="FB4N1000">
        <notes>
          <body xmlns="http://www.w3.org/1999/xhtml">
            <p>SUBSYSTEM: Nucleotide Salvage Pathway</p>
          </body>
        </notes>
        <listOfReactants>
          <speciesReference species="M_atp_c" stoichiometry="1" constant="true"/>
          <speciesReference species="M_dtdp_c" stoichiometry="1" constant="true"/>
        </listOfReactants>
        <listOfProducts>
          <speciesReference species="M_adp_c" stoichiometry="1" constant="true"/>
          <speciesReference species="M_dttp_c" stoichiometry="1" constant="true"/>
        </listOfProducts>
        <fbc:geneProductAssociation>
          <fbc:geneProductRef fbc:geneProduct="ndk_12"/>
        </fbc:geneProductAssociation>
      </reaction>
      <reaction metaid="R_R_tmk" id="R_R_tmk" name="tmk" reversible="true" fast="false" fbc:lowerFluxBound="FB1N1000" fbc:upperFluxBound="FB4N1000">
        <notes>
          <body xmlns="http://www.w3.org/1999/xhtml">
            <p>SUBSYSTEM: Nucleotide Salvage Pathway</p>
          </body>
        </notes>
        <listOfReactants>
          <speciesReference species="M_atp_c" stoichiometry="1" constant="true"/>
          <speciesReference species="M_dtmp_c" stoichiometry="1" constant="true"/>
        </listOfReactants>
        <listOfProducts>
          <speciesReference species="M_adp_c" stoichiometry="1" constant="true"/>
          <speciesReference species="M_dtdp_c" stoichiometry="1" constant="true"/>
        </listOfProducts>
        <fbc:geneProductAssociation>
          <fbc:geneProductRef fbc:geneProduct="tmk"/>
        </fbc:geneProductAssociation>
      </reaction>
      <reaction metaid="R_R_thyA" id="R_R_thyA" name="thyA" reversible="true" fast="false" fbc:lowerFluxBound="FB1N1000" fbc:upperFluxBound="FB4N1000">
        <notes>
          <body xmlns="http://www.w3.org/1999/xhtml">
            <p>SUBSYSTEM: Nucleotide Salvage Pathway</p>
          </body>
        </notes>
        <listOfReactants>
          <speciesReference species="M_dump_c" stoichiometry="1" constant="true"/>
          <speciesReference species="M_mlthf_c" stoichiometry="1" constant="true"/>
        </listOfReactants>
        <listOfProducts>
          <speciesReference species="M_dtmp_c" stoichiometry="1" constant="true"/>
          <speciesReference species="M_dhf_c" stoichiometry="1" constant="true"/>
        </listOfProducts>
        <fbc:geneProductAssociation>
          <fbc:geneProductRef fbc:geneProduct="thyA"/>
        </fbc:geneProductAssociation>
      </reaction>
      <reaction metaid="R_R_dut" id="R_R_dut" name="dut" reversible="false" fast="false" fbc:lowerFluxBound="FB3N0" fbc:upperFluxBound="FB4N1000">
        <notes>
          <body xmlns="http://www.w3.org/1999/xhtml">
            <p>SUBSYSTEM: Nucleotide Salvage Pathway</p>
          </body>
        </notes>
        <listOfReactants>
          <speciesReference species="M_h2o_c" stoichiometry="1" constant="true"/>
          <speciesReference species="M_dutp_c" stoichiometry="1" constant="true"/>
        </listOfReactants>
        <listOfProducts>
          <speciesReference species="M_ppi_c" stoichiometry="1" constant="true"/>
          <speciesReference species="M_dump_c" stoichiometry="1" constant="true"/>
        </listOfProducts>
        <fbc:geneProductAssociation>
          <fbc:geneProductRef fbc:geneProduct="dut"/>
        </fbc:geneProductAssociation>
      </reaction>
      <reaction metaid="R_R_ndk_6" id="R_R_ndk_6" name="ndk_6" reversible="true" fast="false" fbc:lowerFluxBound="FB1N1000" fbc:upperFluxBound="FB4N1000">
        <notes>
          <body xmlns="http://www.w3.org/1999/xhtml">
            <p>SUBSYSTEM: Nucleotide Salvage Pathway</p>
          </body>
        </notes>
        <listOfReactants>
          <speciesReference species="M_atp_c" stoichiometry="1" constant="true"/>
          <speciesReference species="M_dudp_c" stoichiometry="1" constant="true"/>
        </listOfReactants>
        <listOfProducts>
          <speciesReference species="M_adp_c" stoichiometry="1" constant="true"/>
          <speciesReference species="M_dutp_c" stoichiometry="1" constant="true"/>
        </listOfProducts>
        <fbc:geneProductAssociation>
          <fbc:geneProductRef fbc:geneProduct="ndk_6"/>
        </fbc:geneProductAssociation>
      </reaction>
      <reaction metaid="R_R_dcd_2" id="R_R_dcd_2" name="dcd_2" reversible="false" fast="false" fbc:lowerFluxBound="FB3N0" fbc:upperFluxBound="FB4N1000">
        <notes>
          <body xmlns="http://www.w3.org/1999/xhtml">
            <p>SUBSYSTEM: Nucleotide Salvage Pathway</p>
          </body>
        </notes>
        <listOfReactants>
          <speciesReference species="M_h2o_c" stoichiometry="1" constant="true"/>
          <speciesReference species="M_dctp_c" stoichiometry="1" constant="true"/>
        </listOfReactants>
        <listOfProducts>
          <speciesReference species="M_dutp_c" stoichiometry="1" constant="true"/>
          <speciesReference species="M_nh3_c" stoichiometry="1" constant="true"/>
        </listOfProducts>
        <fbc:geneProductAssociation>
          <fbc:geneProductRef fbc:geneProduct="dcd_2"/>
        </fbc:geneProductAssociation>
      </reaction>
      <reaction metaid="R_R_ndk_5" id="R_R_ndk_5" name="ndk_5" reversible="true" fast="false" fbc:lowerFluxBound="FB1N1000" fbc:upperFluxBound="FB4N1000">
        <notes>
          <body xmlns="http://www.w3.org/1999/xhtml">
            <p>SUBSYSTEM: Nucleotide Salvage Pathway</p>
          </body>
        </notes>
        <listOfReactants>
          <speciesReference species="M_atp_c" stoichiometry="1" constant="true"/>
          <speciesReference species="M_dcdp_c" stoichiometry="1" constant="true"/>
        </listOfReactants>
        <listOfProducts>
          <speciesReference species="M_adp_c" stoichiometry="1" constant="true"/>
          <speciesReference species="M_dctp_c" stoichiometry="1" constant="true"/>
        </listOfProducts>
        <fbc:geneProductAssociation>
          <fbc:geneProductRef fbc:geneProduct="ndk_5"/>
        </fbc:geneProductAssociation>
      </reaction>
      <reaction metaid="R_R_ndk_11" id="R_R_ndk_11" name="ndk_11" reversible="true" fast="false" fbc:lowerFluxBound="FB1N1000" fbc:upperFluxBound="FB4N1000">
        <notes>
          <body xmlns="http://www.w3.org/1999/xhtml">
            <p>SUBSYSTEM: Nucleotide Salvage Pathway</p>
          </body>
        </notes>
        <listOfReactants>
          <speciesReference species="M_atp_c" stoichiometry="1" constant="true"/>
          <speciesReference species="M_cdp_c" stoichiometry="1" constant="true"/>
        </listOfReactants>
        <listOfProducts>
          <speciesReference species="M_adp_c" stoichiometry="1" constant="true"/>
          <speciesReference species="M_ctp_c" stoichiometry="1" constant="true"/>
        </listOfProducts>
        <fbc:geneProductAssociation>
          <fbc:geneProductRef fbc:geneProduct="ndk_11"/>
        </fbc:geneProductAssociation>
      </reaction>
      <reaction metaid="R_R_pyrE_1" id="R_R_pyrE_1" name="pyrE_1" reversible="false" fast="false" fbc:lowerFluxBound="FB3N0" fbc:upperFluxBound="FB4N1000">
        <notes>
          <body xmlns="http://www.w3.org/1999/xhtml">
            <p>SUBSYSTEM: Purine and Pyrimidine Biosynthesis</p>
          </body>
        </notes>
        <listOfReactants>
          <speciesReference species="M_prpp_c" stoichiometry="1" constant="true"/>
          <speciesReference species="M_orot_c" stoichiometry="1" constant="true"/>
        </listOfReactants>
        <listOfProducts>
          <speciesReference species="M_ppi_c" stoichiometry="1" constant="true"/>
          <speciesReference species="M_orot5p_c" stoichiometry="1" constant="true"/>
        </listOfProducts>
        <fbc:geneProductAssociation>
          <fbc:geneProductRef fbc:geneProduct="pyrE_1"/>
        </fbc:geneProductAssociation>
      </reaction>
      <reaction metaid="R_R_pyrG_2gln" id="R_R_pyrG_2gln" name="pyrG_2gln" reversible="false" fast="false" fbc:lowerFluxBound="FB3N0" fbc:upperFluxBound="FB4N1000">
        <notes>
          <body xmlns="http://www.w3.org/1999/xhtml">
            <p>SUBSYSTEM: Purine and Pyrimidine Biosynthesis</p>
          </body>
        </notes>
        <listOfReactants>
          <speciesReference species="M_atp_c" stoichiometry="1" constant="true"/>
          <speciesReference species="M_h2o_c" stoichiometry="1" constant="true"/>
          <speciesReference species="M_gln_L_c" stoichiometry="1" constant="true"/>
          <speciesReference species="M_utp_c" stoichiometry="1" constant="true"/>
        </listOfReactants>
        <listOfProducts>
          <speciesReference species="M_adp_c" stoichiometry="1" constant="true"/>
          <speciesReference species="M_pi_c" stoichiometry="1" constant="true"/>
          <speciesReference species="M_glu_L_c" stoichiometry="1" constant="true"/>
          <speciesReference species="M_ctp_c" stoichiometry="1" constant="true"/>
        </listOfProducts>
        <fbc:geneProductAssociation>
          <fbc:geneProductRef fbc:geneProduct="pyrG_2"/>
        </fbc:geneProductAssociation>
      </reaction>
      <reaction metaid="R_R_ndk_10" id="R_R_ndk_10" name="ndk_10" reversible="true" fast="false" fbc:lowerFluxBound="FB1N1000" fbc:upperFluxBound="FB4N1000">
        <notes>
          <body xmlns="http://www.w3.org/1999/xhtml">
            <p>SUBSYSTEM: Nucleotide Salvage Pathway</p>
          </body>
        </notes>
        <listOfReactants>
          <speciesReference species="M_atp_c" stoichiometry="1" constant="true"/>
          <speciesReference species="M_udp_c" stoichiometry="1" constant="true"/>
        </listOfReactants>
        <listOfProducts>
          <speciesReference species="M_adp_c" stoichiometry="1" constant="true"/>
          <speciesReference species="M_utp_c" stoichiometry="1" constant="true"/>
        </listOfProducts>
        <fbc:geneProductAssociation>
          <fbc:geneProductRef fbc:geneProduct="ndk_10"/>
        </fbc:geneProductAssociation>
      </reaction>
      <reaction metaid="R_R_pyrH" id="R_R_pyrH" name="pyrH" reversible="true" fast="false" fbc:lowerFluxBound="FB1N1000" fbc:upperFluxBound="FB4N1000">
        <notes>
          <body xmlns="http://www.w3.org/1999/xhtml">
            <p>SUBSYSTEM: Nucleotide Salvage Pathway</p>
          </body>
        </notes>
        <listOfReactants>
          <speciesReference species="M_atp_c" stoichiometry="1" constant="true"/>
          <speciesReference species="M_ump_c" stoichiometry="1" constant="true"/>
        </listOfReactants>
        <listOfProducts>
          <speciesReference species="M_adp_c" stoichiometry="1" constant="true"/>
          <speciesReference species="M_udp_c" stoichiometry="1" constant="true"/>
        </listOfProducts>
        <fbc:geneProductAssociation>
          <fbc:geneProductRef fbc:geneProduct="cmk_1"/>
        </fbc:geneProductAssociation>
      </reaction>
      <reaction metaid="R_R_pyrF" id="R_R_pyrF" name="pyrF" reversible="false" fast="false" fbc:lowerFluxBound="FB3N0" fbc:upperFluxBound="FB4N1000">
        <notes>
          <body xmlns="http://www.w3.org/1999/xhtml">
            <p>SUBSYSTEM: Purine and Pyrimidine Biosynthesis</p>
          </body>
        </notes>
        <listOfReactants>
          <speciesReference species="M_orot5p_c" stoichiometry="1" constant="true"/>
        </listOfReactants>
        <listOfProducts>
          <speciesReference species="M_co2_c" stoichiometry="1" constant="true"/>
          <speciesReference species="M_ump_c" stoichiometry="1" constant="true"/>
        </listOfProducts>
        <fbc:geneProductAssociation>
          <fbc:geneProductRef fbc:geneProduct="pyrF"/>
        </fbc:geneProductAssociation>
      </reaction>
      <reaction metaid="R_R_pyrD" id="R_R_pyrD" name="pyrD" reversible="false" fast="false" fbc:lowerFluxBound="FB3N0" fbc:upperFluxBound="FB4N1000">
        <notes>
          <body xmlns="http://www.w3.org/1999/xhtml">
            <p>SUBSYSTEM: Purine and Pyrimidine Biosynthesis</p>
          </body>
        </notes>
        <listOfReactants>
          <speciesReference species="M_fum_c" stoichiometry="1" constant="true"/>
          <speciesReference species="M_dhor_S_c" stoichiometry="1" constant="true"/>
        </listOfReactants>
        <listOfProducts>
          <speciesReference species="M_suc_c" stoichiometry="1" constant="true"/>
          <speciesReference species="M_orot_c" stoichiometry="1" constant="true"/>
        </listOfProducts>
        <fbc:geneProductAssociation>
          <fbc:geneProductRef fbc:geneProduct="pyrD"/>
        </fbc:geneProductAssociation>
      </reaction>
      <reaction metaid="R_R_pyrE_2" id="R_R_pyrE_2" name="pyrE_2" reversible="false" fast="false" fbc:lowerFluxBound="FB3N0" fbc:upperFluxBound="FB3N0">
        <notes>
          <body xmlns="http://www.w3.org/1999/xhtml">
            <p>SUBSYSTEM: Purine and Pyrimidine Biosynthesis</p>
          </body>
        </notes>
        <listOfReactants>
          <speciesReference species="M_nad_c" stoichiometry="1" constant="true"/>
          <speciesReference species="M_dhor_S_c" stoichiometry="1" constant="true"/>
        </listOfReactants>
        <listOfProducts>
          <speciesReference species="M_h_c" stoichiometry="1" constant="true"/>
          <speciesReference species="M_nadh_c" stoichiometry="1" constant="true"/>
          <speciesReference species="M_orot_c" stoichiometry="1" constant="true"/>
        </listOfProducts>
        <fbc:geneProductAssociation>
          <fbc:geneProductRef fbc:geneProduct="pyrE_2"/>
        </fbc:geneProductAssociation>
      </reaction>
      <reaction metaid="R_R_pyrC" id="R_R_pyrC" name="pyrC" reversible="false" fast="false" fbc:lowerFluxBound="FB3N0" fbc:upperFluxBound="FB4N1000">
        <notes>
          <body xmlns="http://www.w3.org/1999/xhtml">
            <p>SUBSYSTEM: Purine and Pyrimidine Biosynthesis</p>
          </body>
        </notes>
        <listOfReactants>
          <speciesReference species="M_cbasp_c" stoichiometry="1" constant="true"/>
        </listOfReactants>
        <listOfProducts>
          <speciesReference species="M_h2o_c" stoichiometry="1" constant="true"/>
          <speciesReference species="M_dhor_S_c" stoichiometry="1" constant="true"/>
        </listOfProducts>
        <fbc:geneProductAssociation>
          <fbc:geneProductRef fbc:geneProduct="pyrC"/>
        </fbc:geneProductAssociation>
      </reaction>
      <reaction metaid="R_R_pyrB" id="R_R_pyrB" name="pyrB" reversible="false" fast="false" fbc:lowerFluxBound="FB3N0" fbc:upperFluxBound="FB4N1000">
        <notes>
          <body xmlns="http://www.w3.org/1999/xhtml">
            <p>SUBSYSTEM: Purine and Pyrimidine Biosynthesis</p>
          </body>
        </notes>
        <listOfReactants>
          <speciesReference species="M_asp_L_c" stoichiometry="1" constant="true"/>
          <speciesReference species="M_cbp_c" stoichiometry="1" constant="true"/>
        </listOfReactants>
        <listOfProducts>
          <speciesReference species="M_h_c" stoichiometry="3" constant="true"/>
          <speciesReference species="M_pi_c" stoichiometry="1" constant="true"/>
          <speciesReference species="M_cbasp_c" stoichiometry="1" constant="true"/>
        </listOfProducts>
        <fbc:geneProductAssociation>
          <fbc:geneProductRef fbc:geneProduct="pyrB"/>
        </fbc:geneProductAssociation>
      </reaction>
      <reaction metaid="R_R_nucA_2" id="R_R_nucA_2" name="nucA_2" reversible="false" fast="false" fbc:lowerFluxBound="FB3N0" fbc:upperFluxBound="FB4N1000">
        <notes>
          <body xmlns="http://www.w3.org/1999/xhtml">
            <p>SUBSYSTEM: Nucleotide Salvage Pathway</p>
          </body>
        </notes>
        <listOfReactants>
          <speciesReference species="M_h2o_c" stoichiometry="1" constant="true"/>
          <speciesReference species="M_imp_c" stoichiometry="1" constant="true"/>
        </listOfReactants>
        <listOfProducts>
          <speciesReference species="M_pi_c" stoichiometry="1" constant="true"/>
          <speciesReference species="M_ins_c" stoichiometry="1" constant="true"/>
        </listOfProducts>
        <fbc:geneProductAssociation>
          <fbc:geneProductRef fbc:geneProduct="nucA_2"/>
        </fbc:geneProductAssociation>
      </reaction>
      <reaction metaid="R_R_r2_4_2_8_1" id="R_R_r2_4_2_8_1" name="r2.4.2.8_1" reversible="false" fast="false" fbc:lowerFluxBound="FB3N0" fbc:upperFluxBound="FB4N1000">
        <notes>
          <body xmlns="http://www.w3.org/1999/xhtml">
            <p>SUBSYSTEM: Nucleotide Salvage Pathway</p>
          </body>
        </notes>
        <listOfReactants>
          <speciesReference species="M_prpp_c" stoichiometry="1" constant="true"/>
          <speciesReference species="M_hxan_c" stoichiometry="1" constant="true"/>
        </listOfReactants>
        <listOfProducts>
          <speciesReference species="M_ppi_c" stoichiometry="1" constant="true"/>
          <speciesReference species="M_xmp_c" stoichiometry="1" constant="true"/>
        </listOfProducts>
        <fbc:geneProductAssociation>
          <fbc:geneProductRef fbc:geneProduct="r2__46__4__46__2__46__8_1"/>
        </fbc:geneProductAssociation>
      </reaction>
      <reaction metaid="R_R_r3_2_2_1_1" id="R_R_r3_2_2_1_1" name="r3.2.2.1_1" reversible="false" fast="false" fbc:lowerFluxBound="FB3N0" fbc:upperFluxBound="FB4N1000">
        <notes>
          <body xmlns="http://www.w3.org/1999/xhtml">
            <p>SUBSYSTEM: Nucleotide Salvage Pathway</p>
          </body>
        </notes>
        <listOfReactants>
          <speciesReference species="M_h_c" stoichiometry="3" constant="true"/>
          <speciesReference species="M_pi_c" stoichiometry="1" constant="true"/>
          <speciesReference species="M_adn_c" stoichiometry="1" constant="true"/>
        </listOfReactants>
        <listOfProducts>
          <speciesReference species="M_ade_c" stoichiometry="1" constant="true"/>
          <speciesReference species="M_r1p_c" stoichiometry="1" constant="true"/>
        </listOfProducts>
        <fbc:geneProductAssociation>
          <fbc:geneProductRef fbc:geneProduct="r3__46__2__46__2__46__1_1"/>
        </fbc:geneProductAssociation>
      </reaction>
      <reaction metaid="R_R_r3_2_2_1_2" id="R_R_r3_2_2_1_2" name="r3.2.2.1_2" reversible="false" fast="false" fbc:lowerFluxBound="FB3N0" fbc:upperFluxBound="FB4N1000">
        <notes>
          <body xmlns="http://www.w3.org/1999/xhtml">
            <p>SUBSYSTEM: Nucleotide Salvage Pathway</p>
          </body>
        </notes>
        <listOfReactants>
          <speciesReference species="M_h_c" stoichiometry="3" constant="true"/>
          <speciesReference species="M_pi_c" stoichiometry="1" constant="true"/>
          <speciesReference species="M_ins_c" stoichiometry="1" constant="true"/>
        </listOfReactants>
        <listOfProducts>
          <speciesReference species="M_hxan_c" stoichiometry="1" constant="true"/>
          <speciesReference species="M_r1p_c" stoichiometry="1" constant="true"/>
        </listOfProducts>
        <fbc:geneProductAssociation>
          <fbc:geneProductRef fbc:geneProduct="r3__46__2__46__2__46__1_2"/>
        </fbc:geneProductAssociation>
      </reaction>
      <reaction metaid="R_R_r2_4_2_8_3" id="R_R_r2_4_2_8_3" name="r2.4.2.8_3" reversible="false" fast="false" fbc:lowerFluxBound="FB3N0" fbc:upperFluxBound="FB4N1000">
        <notes>
          <body xmlns="http://www.w3.org/1999/xhtml">
            <p>SUBSYSTEM: Nucleotide Salvage Pathway</p>
          </body>
        </notes>
        <listOfReactants>
          <speciesReference species="M_prpp_c" stoichiometry="1" constant="true"/>
          <speciesReference species="M_ade_c" stoichiometry="1" constant="true"/>
        </listOfReactants>
        <listOfProducts>
          <speciesReference species="M_amp_c" stoichiometry="1" constant="true"/>
          <speciesReference species="M_ppi_c" stoichiometry="1" constant="true"/>
        </listOfProducts>
        <fbc:geneProductAssociation>
          <fbc:geneProductRef fbc:geneProduct="r2__46__4__46__2__46__8_3"/>
        </fbc:geneProductAssociation>
      </reaction>
      <reaction metaid="R_R_amn" id="R_R_amn" name="amn" reversible="false" fast="false" fbc:lowerFluxBound="FB3N0" fbc:upperFluxBound="FB4N1000">
        <notes>
          <body xmlns="http://www.w3.org/1999/xhtml">
            <p>SUBSYSTEM: Nucleotide Salvage Pathway</p>
          </body>
        </notes>
        <listOfReactants>
          <speciesReference species="M_h2o_c" stoichiometry="1" constant="true"/>
          <speciesReference species="M_amp_c" stoichiometry="1" constant="true"/>
        </listOfReactants>
        <listOfProducts>
          <speciesReference species="M_r5p_c" stoichiometry="1" constant="true"/>
          <speciesReference species="M_ade_c" stoichiometry="1" constant="true"/>
        </listOfProducts>
        <fbc:geneProductAssociation>
          <fbc:geneProductRef fbc:geneProduct="amn"/>
        </fbc:geneProductAssociation>
      </reaction>
      <reaction metaid="R_R_r2_4_2_8_2" id="R_R_r2_4_2_8_2" name="r2.4.2.8_2" reversible="false" fast="false" fbc:lowerFluxBound="FB3N0" fbc:upperFluxBound="FB4N1000">
        <notes>
          <body xmlns="http://www.w3.org/1999/xhtml">
            <p>SUBSYSTEM: Nucleotide Salvage Pathway</p>
          </body>
        </notes>
        <listOfReactants>
          <speciesReference species="M_prpp_c" stoichiometry="1" constant="true"/>
          <speciesReference species="M_gua_c" stoichiometry="1" constant="true"/>
        </listOfReactants>
        <listOfProducts>
          <speciesReference species="M_ppi_c" stoichiometry="1" constant="true"/>
          <speciesReference species="M_gmp_c" stoichiometry="1" constant="true"/>
        </listOfProducts>
        <fbc:geneProductAssociation>
          <fbc:geneProductRef fbc:geneProduct="r2__46__4__46__2__46__8_2"/>
        </fbc:geneProductAssociation>
      </reaction>
      <reaction metaid="R_R_nucA_11" id="R_R_nucA_11" name="nucA_11" reversible="false" fast="false" fbc:lowerFluxBound="FB3N0" fbc:upperFluxBound="FB4N1000">
        <notes>
          <body xmlns="http://www.w3.org/1999/xhtml">
            <p>SUBSYSTEM: Nucleotide Salvage Pathway</p>
          </body>
        </notes>
        <listOfReactants>
          <speciesReference species="M_h2o_c" stoichiometry="1" constant="true"/>
          <speciesReference species="M_dgmp_c" stoichiometry="1" constant="true"/>
        </listOfReactants>
        <listOfProducts>
          <speciesReference species="M_pi_c" stoichiometry="1" constant="true"/>
          <speciesReference species="M_dgsn_c" stoichiometry="1" constant="true"/>
        </listOfProducts>
        <fbc:geneProductAssociation>
          <fbc:geneProductRef fbc:geneProduct="nucA_11"/>
        </fbc:geneProductAssociation>
      </reaction>
      <reaction metaid="R_R_r3_2_2_1_4" id="R_R_r3_2_2_1_4" name="r3.2.2.1_4" reversible="false" fast="false" fbc:lowerFluxBound="FB3N0" fbc:upperFluxBound="FB4N1000">
        <notes>
          <body xmlns="http://www.w3.org/1999/xhtml">
            <p>SUBSYSTEM: Nucleotide Salvage Pathway</p>
          </body>
        </notes>
        <listOfReactants>
          <speciesReference species="M_h_c" stoichiometry="3" constant="true"/>
          <speciesReference species="M_pi_c" stoichiometry="1" constant="true"/>
          <speciesReference species="M_gsn_c" stoichiometry="1" constant="true"/>
        </listOfReactants>
        <listOfProducts>
          <speciesReference species="M_r1p_c" stoichiometry="1" constant="true"/>
          <speciesReference species="M_gua_c" stoichiometry="1" constant="true"/>
        </listOfProducts>
        <fbc:geneProductAssociation>
          <fbc:geneProductRef fbc:geneProduct="r3__46__2__46__2__46__1_4"/>
        </fbc:geneProductAssociation>
      </reaction>
      <reaction metaid="R_R_nucA_4" id="R_R_nucA_4" name="nucA_4" reversible="false" fast="false" fbc:lowerFluxBound="FB3N0" fbc:upperFluxBound="FB4N1000">
        <notes>
          <body xmlns="http://www.w3.org/1999/xhtml">
            <p>SUBSYSTEM: Nucleotide Salvage Pathway</p>
          </body>
        </notes>
        <listOfReactants>
          <speciesReference species="M_h2o_c" stoichiometry="1" constant="true"/>
          <speciesReference species="M_gmp_c" stoichiometry="1" constant="true"/>
        </listOfReactants>
        <listOfProducts>
          <speciesReference species="M_pi_c" stoichiometry="1" constant="true"/>
          <speciesReference species="M_gsn_c" stoichiometry="1" constant="true"/>
        </listOfProducts>
        <fbc:geneProductAssociation>
          <fbc:geneProductRef fbc:geneProduct="nucA_4"/>
        </fbc:geneProductAssociation>
      </reaction>
      <reaction metaid="R_R_r3_2_2_1_3" id="R_R_r3_2_2_1_3" name="r3.2.2.1_3" reversible="false" fast="false" fbc:lowerFluxBound="FB3N0" fbc:upperFluxBound="FB4N1000">
        <notes>
          <body xmlns="http://www.w3.org/1999/xhtml">
            <p>SUBSYSTEM: Nucleotide Salvage Pathway</p>
          </body>
        </notes>
        <listOfReactants>
          <speciesReference species="M_h_c" stoichiometry="3" constant="true"/>
          <speciesReference species="M_pi_c" stoichiometry="1" constant="true"/>
          <speciesReference species="M_xtsn_c" stoichiometry="1" constant="true"/>
        </listOfReactants>
        <listOfProducts>
          <speciesReference species="M_r1p_c" stoichiometry="1" constant="true"/>
          <speciesReference species="M_xan_c" stoichiometry="1" constant="true"/>
        </listOfProducts>
        <fbc:geneProductAssociation>
          <fbc:geneProductRef fbc:geneProduct="r3__46__2__46__2__46__1_3"/>
        </fbc:geneProductAssociation>
      </reaction>
      <reaction metaid="R_R_nucA_5" id="R_R_nucA_5" name="nucA_5" reversible="false" fast="false" fbc:lowerFluxBound="FB3N0" fbc:upperFluxBound="FB4N1000">
        <notes>
          <body xmlns="http://www.w3.org/1999/xhtml">
            <p>SUBSYSTEM: Nucleotide Salvage Pathway</p>
          </body>
        </notes>
        <listOfReactants>
          <speciesReference species="M_h2o_c" stoichiometry="1" constant="true"/>
          <speciesReference species="M_cmp_c" stoichiometry="1" constant="true"/>
        </listOfReactants>
        <listOfProducts>
          <speciesReference species="M_pi_c" stoichiometry="1" constant="true"/>
          <speciesReference species="M_cytd_c" stoichiometry="1" constant="true"/>
        </listOfProducts>
        <fbc:geneProductAssociation>
          <fbc:geneProductRef fbc:geneProduct="nucA_5"/>
        </fbc:geneProductAssociation>
      </reaction>
      <reaction metaid="R_R_nucA_6" id="R_R_nucA_6" name="nucA_6" reversible="false" fast="false" fbc:lowerFluxBound="FB3N0" fbc:upperFluxBound="FB4N1000">
        <notes>
          <body xmlns="http://www.w3.org/1999/xhtml">
            <p>SUBSYSTEM: Nucleotide Salvage Pathway</p>
          </body>
        </notes>
        <listOfReactants>
          <speciesReference species="M_h2o_c" stoichiometry="1" constant="true"/>
          <speciesReference species="M_ump_c" stoichiometry="1" constant="true"/>
        </listOfReactants>
        <listOfProducts>
          <speciesReference species="M_pi_c" stoichiometry="1" constant="true"/>
          <speciesReference species="M_uri_c" stoichiometry="1" constant="true"/>
        </listOfProducts>
        <fbc:geneProductAssociation>
          <fbc:geneProductRef fbc:geneProduct="nucA_6"/>
        </fbc:geneProductAssociation>
      </reaction>
      <reaction metaid="R_R_cmk_2" id="R_R_cmk_2" name="cmk_2" reversible="true" fast="false" fbc:lowerFluxBound="FB1N1000" fbc:upperFluxBound="FB4N1000">
        <notes>
          <body xmlns="http://www.w3.org/1999/xhtml">
            <p>SUBSYSTEM: Nucleotide Salvage Pathway</p>
          </body>
        </notes>
        <listOfReactants>
          <speciesReference species="M_atp_c" stoichiometry="1" constant="true"/>
          <speciesReference species="M_cmp_c" stoichiometry="1" constant="true"/>
        </listOfReactants>
        <listOfProducts>
          <speciesReference species="M_adp_c" stoichiometry="1" constant="true"/>
          <speciesReference species="M_cdp_c" stoichiometry="1" constant="true"/>
        </listOfProducts>
        <fbc:geneProductAssociation>
          <fbc:geneProductRef fbc:geneProduct="cmk_2"/>
        </fbc:geneProductAssociation>
      </reaction>
      <reaction metaid="R_R_pyrR" id="R_R_pyrR" name="pyrR" reversible="true" fast="false" fbc:lowerFluxBound="FB1N1000" fbc:upperFluxBound="FB4N1000">
        <notes>
          <body xmlns="http://www.w3.org/1999/xhtml">
            <p>SUBSYSTEM: Nucleotide Salvage Pathway</p>
          </body>
        </notes>
        <listOfReactants>
          <speciesReference species="M_prpp_c" stoichiometry="1" constant="true"/>
          <speciesReference species="M_ura_c" stoichiometry="1" constant="true"/>
        </listOfReactants>
        <listOfProducts>
          <speciesReference species="M_ppi_c" stoichiometry="1" constant="true"/>
          <speciesReference species="M_ump_c" stoichiometry="1" constant="true"/>
        </listOfProducts>
        <fbc:geneProductAssociation>
          <fbc:geneProductRef fbc:geneProduct="pyrR"/>
        </fbc:geneProductAssociation>
      </reaction>
      <reaction metaid="R_R_nucA_7" id="R_R_nucA_7" name="nucA_7" reversible="false" fast="false" fbc:lowerFluxBound="FB3N0" fbc:upperFluxBound="FB4N1000">
        <notes>
          <body xmlns="http://www.w3.org/1999/xhtml">
            <p>SUBSYSTEM: Nucleotide Salvage Pathway</p>
          </body>
        </notes>
        <listOfReactants>
          <speciesReference species="M_h2o_c" stoichiometry="1" constant="true"/>
          <speciesReference species="M_dtmp_c" stoichiometry="1" constant="true"/>
        </listOfReactants>
        <listOfProducts>
          <speciesReference species="M_pi_c" stoichiometry="1" constant="true"/>
          <speciesReference species="M_thymd_c" stoichiometry="1" constant="true"/>
        </listOfProducts>
        <fbc:geneProductAssociation>
          <fbc:geneProductRef fbc:geneProduct="nucA_7"/>
        </fbc:geneProductAssociation>
      </reaction>
      <reaction metaid="R_R_gltBD" id="R_R_gltBD" name="gltBD" reversible="false" fast="false" fbc:lowerFluxBound="FB3N0" fbc:upperFluxBound="FB4N1000">
        <notes>
          <body xmlns="http://www.w3.org/1999/xhtml">
            <p>SUBSYSTEM: Glutamate metabolism</p>
          </body>
        </notes>
        <listOfReactants>
          <speciesReference species="M_h_c" stoichiometry="1" constant="true"/>
          <speciesReference species="M_nadph_c" stoichiometry="1" constant="true"/>
          <speciesReference species="M_akg_c" stoichiometry="1" constant="true"/>
          <speciesReference species="M_gln_L_c" stoichiometry="1" constant="true"/>
        </listOfReactants>
        <listOfProducts>
          <speciesReference species="M_nadp_c" stoichiometry="1" constant="true"/>
          <speciesReference species="M_glu_L_c" stoichiometry="2" constant="true"/>
        </listOfProducts>
        <fbc:geneProductAssociation>
          <fbc:geneProductRef fbc:geneProduct="gltBD"/>
        </fbc:geneProductAssociation>
      </reaction>
      <reaction metaid="R_R_gdh" id="R_R_gdh" name="gdh" reversible="false" fast="false" fbc:lowerFluxBound="FB3N0" fbc:upperFluxBound="FB4N1000">
        <notes>
          <body xmlns="http://www.w3.org/1999/xhtml">
            <p>SUBSYSTEM: Glutamate metabolism</p>
          </body>
        </notes>
        <listOfReactants>
          <speciesReference species="M_h_c" stoichiometry="1" constant="true"/>
          <speciesReference species="M_nadph_c" stoichiometry="1" constant="true"/>
          <speciesReference species="M_akg_c" stoichiometry="1" constant="true"/>
          <speciesReference species="M_nh3_c" stoichiometry="1" constant="true"/>
        </listOfReactants>
        <listOfProducts>
          <speciesReference species="M_h2o_c" stoichiometry="1" constant="true"/>
          <speciesReference species="M_nadp_c" stoichiometry="1" constant="true"/>
          <speciesReference species="M_glu_L_c" stoichiometry="1" constant="true"/>
        </listOfProducts>
        <fbc:geneProductAssociation>
          <fbc:geneProductRef fbc:geneProduct="gdh"/>
        </fbc:geneProductAssociation>
      </reaction>
      <reaction metaid="R_R_glnA" id="R_R_glnA" name="glnA" reversible="false" fast="false" fbc:lowerFluxBound="FB3N0" fbc:upperFluxBound="FB4N1000">
        <notes>
          <body xmlns="http://www.w3.org/1999/xhtml">
            <p>SUBSYSTEM: Glutamate metabolism</p>
          </body>
        </notes>
        <listOfReactants>
          <speciesReference species="M_atp_c" stoichiometry="1" constant="true"/>
          <speciesReference species="M_glu_L_c" stoichiometry="1" constant="true"/>
          <speciesReference species="M_nh3_c" stoichiometry="1" constant="true"/>
        </listOfReactants>
        <listOfProducts>
          <speciesReference species="M_h_c" stoichiometry="3" constant="true"/>
          <speciesReference species="M_adp_c" stoichiometry="1" constant="true"/>
          <speciesReference species="M_pi_c" stoichiometry="1" constant="true"/>
          <speciesReference species="M_gln_L_c" stoichiometry="1" constant="true"/>
        </listOfProducts>
        <fbc:geneProductAssociation>
          <fbc:geneProductRef fbc:geneProduct="glnA"/>
        </fbc:geneProductAssociation>
      </reaction>
      <reaction metaid="R_R_NCgl0388" id="R_R_NCgl0388" name="NCgl0388" reversible="false" fast="false" fbc:lowerFluxBound="FB3N0" fbc:upperFluxBound="FB4N1000">
        <notes>
          <body xmlns="http://www.w3.org/1999/xhtml">
            <p>SUBSYSTEM: Alanine and Aspartate Metabolism</p>
          </body>
        </notes>
        <listOfReactants>
          <speciesReference species="M_pyr_c" stoichiometry="1" constant="true"/>
          <speciesReference species="M_val_L_c" stoichiometry="1" constant="true"/>
        </listOfReactants>
        <listOfProducts>
          <speciesReference species="M_3mob_c" stoichiometry="1" constant="true"/>
          <speciesReference species="M_ala_L_c" stoichiometry="1" constant="true"/>
        </listOfProducts>
        <fbc:geneProductAssociation>
          <fbc:geneProductRef fbc:geneProduct="NCgl0388"/>
        </fbc:geneProductAssociation>
      </reaction>
      <reaction metaid="R_R_alr" id="R_R_alr" name="alr" reversible="false" fast="false" fbc:lowerFluxBound="FB3N0" fbc:upperFluxBound="FB4N1000">
        <notes>
          <body xmlns="http://www.w3.org/1999/xhtml">
            <p>SUBSYSTEM: Alanine and Aspartate Metabolism</p>
          </body>
        </notes>
        <listOfReactants>
          <speciesReference species="M_ala_L_c" stoichiometry="1" constant="true"/>
        </listOfReactants>
        <listOfProducts>
          <speciesReference species="M_ala_D_c" stoichiometry="1" constant="true"/>
        </listOfProducts>
        <fbc:geneProductAssociation>
          <fbc:geneProductRef fbc:geneProduct="alr"/>
        </fbc:geneProductAssociation>
      </reaction>
      <reaction metaid="R_R_ilvE_val" id="R_R_ilvE_val" name="ilvE_val" reversible="false" fast="false" fbc:lowerFluxBound="FB3N0" fbc:upperFluxBound="FB4N1000">
        <notes>
          <body xmlns="http://www.w3.org/1999/xhtml">
            <p>SUBSYSTEM: Valine Leucine and Isoleucine Metabolism</p>
          </body>
        </notes>
        <listOfReactants>
          <speciesReference species="M_glu_L_c" stoichiometry="1" constant="true"/>
          <speciesReference species="M_3mob_c" stoichiometry="1" constant="true"/>
        </listOfReactants>
        <listOfProducts>
          <speciesReference species="M_akg_c" stoichiometry="1" constant="true"/>
          <speciesReference species="M_val_L_c" stoichiometry="1" constant="true"/>
        </listOfProducts>
        <fbc:geneProductAssociation>
          <fbc:geneProductRef fbc:geneProduct="ilvE_val"/>
        </fbc:geneProductAssociation>
      </reaction>
      <reaction metaid="R_R_ilvBN_val" id="R_R_ilvBN_val" name="ilvBN_val" reversible="false" fast="false" fbc:lowerFluxBound="FB3N0" fbc:upperFluxBound="FB4N1000">
        <notes>
          <body xmlns="http://www.w3.org/1999/xhtml">
            <p>SUBSYSTEM: Valine Leucine and Isoleucine Metabolism</p>
          </body>
        </notes>
        <listOfReactants>
          <speciesReference species="M_pyr_c" stoichiometry="2" constant="true"/>
        </listOfReactants>
        <listOfProducts>
          <speciesReference species="M_co2_c" stoichiometry="1" constant="true"/>
          <speciesReference species="M_alac_S_c" stoichiometry="1" constant="true"/>
        </listOfProducts>
        <fbc:geneProductAssociation>
          <fbc:geneProductRef fbc:geneProduct="ilvBN_val"/>
        </fbc:geneProductAssociation>
      </reaction>
      <reaction metaid="R_R_ilvC_val" id="R_R_ilvC_val" name="ilvC_val" reversible="false" fast="false" fbc:lowerFluxBound="FB3N0" fbc:upperFluxBound="FB4N1000">
        <notes>
          <body xmlns="http://www.w3.org/1999/xhtml">
            <p>SUBSYSTEM: Valine Leucine and Isoleucine Metabolism</p>
          </body>
        </notes>
        <listOfReactants>
          <speciesReference species="M_h_c" stoichiometry="1" constant="true"/>
          <speciesReference species="M_nadph_c" stoichiometry="1" constant="true"/>
          <speciesReference species="M_alac_S_c" stoichiometry="1" constant="true"/>
        </listOfReactants>
        <listOfProducts>
          <speciesReference species="M_nadp_c" stoichiometry="1" constant="true"/>
          <speciesReference species="M_23dhmb_c" stoichiometry="1" constant="true"/>
        </listOfProducts>
        <fbc:geneProductAssociation>
          <fbc:geneProductRef fbc:geneProduct="ilvC_val"/>
        </fbc:geneProductAssociation>
      </reaction>
      <reaction metaid="R_R_ilvD_val" id="R_R_ilvD_val" name="ilvD_val" reversible="false" fast="false" fbc:lowerFluxBound="FB3N0" fbc:upperFluxBound="FB4N1000">
        <notes>
          <body xmlns="http://www.w3.org/1999/xhtml">
            <p>SUBSYSTEM: Valine Leucine and Isoleucine Metabolism</p>
          </body>
        </notes>
        <listOfReactants>
          <speciesReference species="M_23dhmb_c" stoichiometry="1" constant="true"/>
        </listOfReactants>
        <listOfProducts>
          <speciesReference species="M_h2o_c" stoichiometry="1" constant="true"/>
          <speciesReference species="M_3mob_c" stoichiometry="1" constant="true"/>
        </listOfProducts>
        <fbc:geneProductAssociation>
          <fbc:geneProductRef fbc:geneProduct="ilvD_val"/>
        </fbc:geneProductAssociation>
      </reaction>
      <reaction metaid="R_R_aspB" id="R_R_aspB" name="aspB" reversible="false" fast="false" fbc:lowerFluxBound="FB3N0" fbc:upperFluxBound="FB4N1000">
        <notes>
          <body xmlns="http://www.w3.org/1999/xhtml">
            <p>SUBSYSTEM: Alanine and Aspartate Metabolism</p>
          </body>
        </notes>
        <listOfReactants>
          <speciesReference species="M_oaa_c" stoichiometry="1" constant="true"/>
          <speciesReference species="M_glu_L_c" stoichiometry="1" constant="true"/>
        </listOfReactants>
        <listOfProducts>
          <speciesReference species="M_akg_c" stoichiometry="1" constant="true"/>
          <speciesReference species="M_asp_L_c" stoichiometry="1" constant="true"/>
        </listOfProducts>
        <fbc:geneProductAssociation>
          <fbc:geneProductRef fbc:geneProduct="aspB"/>
        </fbc:geneProductAssociation>
      </reaction>
      <reaction metaid="R_R_lysC" id="R_R_lysC" name="lysC" reversible="false" fast="false" fbc:lowerFluxBound="FB3N0" fbc:upperFluxBound="FB4N1000">
        <notes>
          <body xmlns="http://www.w3.org/1999/xhtml">
            <p>SUBSYSTEM: Threonine and Lysine Metabolism</p>
          </body>
        </notes>
        <listOfReactants>
          <speciesReference species="M_atp_c" stoichiometry="1" constant="true"/>
          <speciesReference species="M_asp_L_c" stoichiometry="1" constant="true"/>
        </listOfReactants>
        <listOfProducts>
          <speciesReference species="M_adp_c" stoichiometry="1" constant="true"/>
          <speciesReference species="M_4pasp_c" stoichiometry="1" constant="true"/>
        </listOfProducts>
        <fbc:geneProductAssociation>
          <fbc:geneProductRef fbc:geneProduct="lysC"/>
        </fbc:geneProductAssociation>
      </reaction>
      <reaction metaid="R_R_asd" id="R_R_asd" name="asd" reversible="false" fast="false" fbc:lowerFluxBound="FB3N0" fbc:upperFluxBound="FB4N1000">
        <notes>
          <body xmlns="http://www.w3.org/1999/xhtml">
            <p>SUBSYSTEM: Threonine and Lysine Metabolism</p>
          </body>
        </notes>
        <listOfReactants>
          <speciesReference species="M_nadph_c" stoichiometry="1" constant="true"/>
          <speciesReference species="M_4pasp_c" stoichiometry="1" constant="true"/>
        </listOfReactants>
        <listOfProducts>
          <speciesReference species="M_h_c" stoichiometry="2" constant="true"/>
          <speciesReference species="M_pi_c" stoichiometry="1" constant="true"/>
          <speciesReference species="M_nadp_c" stoichiometry="1" constant="true"/>
          <speciesReference species="M_aspsa_c" stoichiometry="1" constant="true"/>
        </listOfProducts>
        <fbc:geneProductAssociation>
          <fbc:geneProductRef fbc:geneProduct="asd"/>
        </fbc:geneProductAssociation>
      </reaction>
      <reaction metaid="R_R_dapA" id="R_R_dapA" name="dapA" reversible="false" fast="false" fbc:lowerFluxBound="FB3N0" fbc:upperFluxBound="FB4N1000">
        <notes>
          <body xmlns="http://www.w3.org/1999/xhtml">
            <p>SUBSYSTEM: Threonine and Lysine Metabolism</p>
          </body>
        </notes>
        <listOfReactants>
          <speciesReference species="M_pyr_c" stoichiometry="1" constant="true"/>
          <speciesReference species="M_aspsa_c" stoichiometry="1" constant="true"/>
        </listOfReactants>
        <listOfProducts>
          <speciesReference species="M_h2o_c" stoichiometry="2" constant="true"/>
          <speciesReference species="M_23dhdp_c" stoichiometry="1" constant="true"/>
        </listOfProducts>
        <fbc:geneProductAssociation>
          <fbc:geneProductRef fbc:geneProduct="dapA"/>
        </fbc:geneProductAssociation>
      </reaction>
      <reaction metaid="R_R_dapB" id="R_R_dapB" name="dapB" reversible="false" fast="false" fbc:lowerFluxBound="FB3N0" fbc:upperFluxBound="FB4N1000">
        <notes>
          <body xmlns="http://www.w3.org/1999/xhtml">
            <p>SUBSYSTEM: Threonine and Lysine Metabolism</p>
          </body>
        </notes>
        <listOfReactants>
          <speciesReference species="M_h_c" stoichiometry="1" constant="true"/>
          <speciesReference species="M_nadph_c" stoichiometry="1" constant="true"/>
          <speciesReference species="M_23dhdp_c" stoichiometry="1" constant="true"/>
        </listOfReactants>
        <listOfProducts>
          <speciesReference species="M_nadp_c" stoichiometry="1" constant="true"/>
          <speciesReference species="M_thdp_c" stoichiometry="1" constant="true"/>
        </listOfProducts>
        <fbc:geneProductAssociation>
          <fbc:geneProductRef fbc:geneProduct="dapB"/>
        </fbc:geneProductAssociation>
      </reaction>
      <reaction metaid="R_R_dapD" id="R_R_dapD" name="dapD" reversible="false" fast="false" fbc:lowerFluxBound="FB3N0" fbc:upperFluxBound="FB4N1000">
        <notes>
          <body xmlns="http://www.w3.org/1999/xhtml">
            <p>SUBSYSTEM: Threonine and Lysine Metabolism</p>
          </body>
        </notes>
        <listOfReactants>
          <speciesReference species="M_h2o_c" stoichiometry="1" constant="true"/>
          <speciesReference species="M_succoa_c" stoichiometry="1" constant="true"/>
          <speciesReference species="M_thdp_c" stoichiometry="1" constant="true"/>
        </listOfReactants>
        <listOfProducts>
          <speciesReference species="M_coa_c" stoichiometry="1" constant="true"/>
          <speciesReference species="M_sl2a6o_c" stoichiometry="1" constant="true"/>
        </listOfProducts>
        <fbc:geneProductAssociation>
          <fbc:geneProductRef fbc:geneProduct="dapD"/>
        </fbc:geneProductAssociation>
      </reaction>
      <reaction metaid="R_R_dapC" id="R_R_dapC" name="dapC" reversible="false" fast="false" fbc:lowerFluxBound="FB3N0" fbc:upperFluxBound="FB4N1000">
        <notes>
          <body xmlns="http://www.w3.org/1999/xhtml">
            <p>SUBSYSTEM: Threonine and Lysine Metabolism</p>
          </body>
        </notes>
        <listOfReactants>
          <speciesReference species="M_glu_L_c" stoichiometry="1" constant="true"/>
          <speciesReference species="M_sl2a6o_c" stoichiometry="1" constant="true"/>
        </listOfReactants>
        <listOfProducts>
          <speciesReference species="M_akg_c" stoichiometry="1" constant="true"/>
          <speciesReference species="M_sl26da_c" stoichiometry="1" constant="true"/>
        </listOfProducts>
        <fbc:geneProductAssociation>
          <fbc:geneProductRef fbc:geneProduct="dapC"/>
        </fbc:geneProductAssociation>
      </reaction>
      <reaction metaid="R_R_dapE" id="R_R_dapE" name="dapE" reversible="false" fast="false" fbc:lowerFluxBound="FB3N0" fbc:upperFluxBound="FB4N1000">
        <notes>
          <body xmlns="http://www.w3.org/1999/xhtml">
            <p>SUBSYSTEM: Threonine and Lysine Metabolism</p>
          </body>
        </notes>
        <listOfReactants>
          <speciesReference species="M_h2o_c" stoichiometry="1" constant="true"/>
          <speciesReference species="M_sl26da_c" stoichiometry="1" constant="true"/>
        </listOfReactants>
        <listOfProducts>
          <speciesReference species="M_suc_c" stoichiometry="1" constant="true"/>
          <speciesReference species="M_26dap_LL_c" stoichiometry="1" constant="true"/>
        </listOfProducts>
        <fbc:geneProductAssociation>
          <fbc:geneProductRef fbc:geneProduct="dapE"/>
        </fbc:geneProductAssociation>
      </reaction>
      <reaction metaid="R_R_dapF" id="R_R_dapF" name="dapF" reversible="false" fast="false" fbc:lowerFluxBound="FB3N0" fbc:upperFluxBound="FB4N1000">
        <notes>
          <body xmlns="http://www.w3.org/1999/xhtml">
            <p>SUBSYSTEM: Threonine and Lysine Metabolism</p>
          </body>
        </notes>
        <listOfReactants>
          <speciesReference species="M_26dap_LL_c" stoichiometry="1" constant="true"/>
        </listOfReactants>
        <listOfProducts>
          <speciesReference species="M_26dap_M_c" stoichiometry="1" constant="true"/>
        </listOfProducts>
        <fbc:geneProductAssociation>
          <fbc:geneProductRef fbc:geneProduct="dapF"/>
        </fbc:geneProductAssociation>
      </reaction>
      <reaction metaid="R_R_ddh" id="R_R_ddh" name="ddh" reversible="false" fast="false" fbc:lowerFluxBound="FB3N0" fbc:upperFluxBound="FB4N1000">
        <notes>
          <body xmlns="http://www.w3.org/1999/xhtml">
            <p>SUBSYSTEM: Threonine and Lysine Metabolism</p>
          </body>
        </notes>
        <listOfReactants>
          <speciesReference species="M_h_c" stoichiometry="1" constant="true"/>
          <speciesReference species="M_nadph_c" stoichiometry="1" constant="true"/>
          <speciesReference species="M_nh3_c" stoichiometry="1" constant="true"/>
          <speciesReference species="M_thdp_c" stoichiometry="1" constant="true"/>
        </listOfReactants>
        <listOfProducts>
          <speciesReference species="M_nadp_c" stoichiometry="1" constant="true"/>
          <speciesReference species="M_26dap_M_c" stoichiometry="1" constant="true"/>
        </listOfProducts>
        <fbc:geneProductAssociation>
          <fbc:geneProductRef fbc:geneProduct="ddh"/>
        </fbc:geneProductAssociation>
      </reaction>
      <reaction metaid="R_R_lysA" id="R_R_lysA" name="lysA" reversible="false" fast="false" fbc:lowerFluxBound="FB3N0" fbc:upperFluxBound="FB4N1000">
        <notes>
          <body xmlns="http://www.w3.org/1999/xhtml">
            <p>SUBSYSTEM: Threonine and Lysine Metabolism</p>
          </body>
        </notes>
        <listOfReactants>
          <speciesReference species="M_26dap_M_c" stoichiometry="1" constant="true"/>
        </listOfReactants>
        <listOfProducts>
          <speciesReference species="M_co2_c" stoichiometry="1" constant="true"/>
          <speciesReference species="M_lys_L_c" stoichiometry="1" constant="true"/>
        </listOfProducts>
        <fbc:geneProductAssociation>
          <fbc:geneProductRef fbc:geneProduct="lysA"/>
        </fbc:geneProductAssociation>
      </reaction>
      <reaction metaid="R_R_argR" id="R_R_argR" name="argR" reversible="false" fast="false" fbc:lowerFluxBound="FB3N0" fbc:upperFluxBound="FB4N1000">
        <notes>
          <body xmlns="http://www.w3.org/1999/xhtml">
            <p>SUBSYSTEM: Arginine and Proline Metabolism</p>
          </body>
        </notes>
        <listOfReactants>
          <speciesReference species="M_accoa_c" stoichiometry="1" constant="true"/>
          <speciesReference species="M_glu_L_c" stoichiometry="1" constant="true"/>
        </listOfReactants>
        <listOfProducts>
          <speciesReference species="M_coa_c" stoichiometry="1" constant="true"/>
          <speciesReference species="M_acglu_c" stoichiometry="1" constant="true"/>
        </listOfProducts>
        <fbc:geneProductAssociation>
          <fbc:geneProductRef fbc:geneProduct="argR"/>
        </fbc:geneProductAssociation>
      </reaction>
      <reaction metaid="R_R_carA" id="R_R_carA" name="carA" reversible="false" fast="false" fbc:lowerFluxBound="FB3N0" fbc:upperFluxBound="FB4N1000">
        <notes>
          <body xmlns="http://www.w3.org/1999/xhtml">
            <p>SUBSYSTEM: Arginine and Proline Metabolism</p>
          </body>
        </notes>
        <listOfReactants>
          <speciesReference species="M_atp_c" stoichiometry="2" constant="true"/>
          <speciesReference species="M_h2o_c" stoichiometry="1" constant="true"/>
          <speciesReference species="M_hco3_c" stoichiometry="1" constant="true"/>
          <speciesReference species="M_gln_L_c" stoichiometry="1" constant="true"/>
        </listOfReactants>
        <listOfProducts>
          <speciesReference species="M_h_c" stoichiometry="2" constant="true"/>
          <speciesReference species="M_adp_c" stoichiometry="2" constant="true"/>
          <speciesReference species="M_pi_c" stoichiometry="1" constant="true"/>
          <speciesReference species="M_glu_L_c" stoichiometry="1" constant="true"/>
          <speciesReference species="M_cbp_c" stoichiometry="1" constant="true"/>
        </listOfProducts>
        <fbc:geneProductAssociation>
          <fbc:geneProductRef fbc:geneProduct="carA"/>
        </fbc:geneProductAssociation>
      </reaction>
      <reaction metaid="R_R_argJ" id="R_R_argJ" name="argJ" reversible="false" fast="false" fbc:lowerFluxBound="FB3N0" fbc:upperFluxBound="FB4N1000">
        <notes>
          <body xmlns="http://www.w3.org/1999/xhtml">
            <p>SUBSYSTEM: Arginine and Proline Metabolism</p>
          </body>
        </notes>
        <listOfReactants>
          <speciesReference species="M_glu_L_c" stoichiometry="1" constant="true"/>
          <speciesReference species="M_acorn_c" stoichiometry="1" constant="true"/>
        </listOfReactants>
        <listOfProducts>
          <speciesReference species="M_acglu_c" stoichiometry="1" constant="true"/>
          <speciesReference species="M_orn_c" stoichiometry="1" constant="true"/>
        </listOfProducts>
        <fbc:geneProductAssociation>
          <fbc:geneProductRef fbc:geneProduct="argJ"/>
        </fbc:geneProductAssociation>
      </reaction>
      <reaction metaid="R_R_argB" id="R_R_argB" name="argB" reversible="false" fast="false" fbc:lowerFluxBound="FB3N0" fbc:upperFluxBound="FB4N1000">
        <notes>
          <body xmlns="http://www.w3.org/1999/xhtml">
            <p>SUBSYSTEM: Arginine and Proline Metabolism</p>
          </body>
        </notes>
        <listOfReactants>
          <speciesReference species="M_atp_c" stoichiometry="1" constant="true"/>
          <speciesReference species="M_acglu_c" stoichiometry="1" constant="true"/>
        </listOfReactants>
        <listOfProducts>
          <speciesReference species="M_adp_c" stoichiometry="1" constant="true"/>
          <speciesReference species="M_acg5p_c" stoichiometry="1" constant="true"/>
        </listOfProducts>
        <fbc:geneProductAssociation>
          <fbc:geneProductRef fbc:geneProduct="argB"/>
        </fbc:geneProductAssociation>
      </reaction>
      <reaction metaid="R_R_argC" id="R_R_argC" name="argC" reversible="false" fast="false" fbc:lowerFluxBound="FB3N0" fbc:upperFluxBound="FB4N1000">
        <notes>
          <body xmlns="http://www.w3.org/1999/xhtml">
            <p>SUBSYSTEM: Arginine and Proline Metabolism</p>
          </body>
        </notes>
        <listOfReactants>
          <speciesReference species="M_h_c" stoichiometry="1" constant="true"/>
          <speciesReference species="M_nadph_c" stoichiometry="1" constant="true"/>
          <speciesReference species="M_acg5p_c" stoichiometry="1" constant="true"/>
        </listOfReactants>
        <listOfProducts>
          <speciesReference species="M_pi_c" stoichiometry="1" constant="true"/>
          <speciesReference species="M_nadp_c" stoichiometry="1" constant="true"/>
          <speciesReference species="M_acg5sa_c" stoichiometry="1" constant="true"/>
        </listOfProducts>
        <fbc:geneProductAssociation>
          <fbc:geneProductRef fbc:geneProduct="argC"/>
        </fbc:geneProductAssociation>
      </reaction>
      <reaction metaid="R_R_argD" id="R_R_argD" name="argD" reversible="false" fast="false" fbc:lowerFluxBound="FB3N0" fbc:upperFluxBound="FB4N1000">
        <notes>
          <body xmlns="http://www.w3.org/1999/xhtml">
            <p>SUBSYSTEM: Arginine and Proline Metabolism</p>
          </body>
        </notes>
        <listOfReactants>
          <speciesReference species="M_glu_L_c" stoichiometry="1" constant="true"/>
          <speciesReference species="M_acg5sa_c" stoichiometry="1" constant="true"/>
        </listOfReactants>
        <listOfProducts>
          <speciesReference species="M_akg_c" stoichiometry="1" constant="true"/>
          <speciesReference species="M_acorn_c" stoichiometry="1" constant="true"/>
        </listOfProducts>
        <fbc:geneProductAssociation>
          <fbc:geneProductRef fbc:geneProduct="argD"/>
        </fbc:geneProductAssociation>
      </reaction>
      <reaction metaid="R_R_argF" id="R_R_argF" name="argF" reversible="false" fast="false" fbc:lowerFluxBound="FB3N0" fbc:upperFluxBound="FB4N1000">
        <notes>
          <body xmlns="http://www.w3.org/1999/xhtml">
            <p>SUBSYSTEM: Arginine and Proline Metabolism</p>
          </body>
        </notes>
        <listOfReactants>
          <speciesReference species="M_cbp_c" stoichiometry="1" constant="true"/>
          <speciesReference species="M_orn_c" stoichiometry="1" constant="true"/>
        </listOfReactants>
        <listOfProducts>
          <speciesReference species="M_pi_c" stoichiometry="1" constant="true"/>
          <speciesReference species="M_citr_L_c" stoichiometry="1" constant="true"/>
        </listOfProducts>
        <fbc:geneProductAssociation>
          <fbc:geneProductRef fbc:geneProduct="argF"/>
        </fbc:geneProductAssociation>
      </reaction>
      <reaction metaid="R_R_argH" id="R_R_argH" name="argH" reversible="false" fast="false" fbc:lowerFluxBound="FB3N0" fbc:upperFluxBound="FB4N1000">
        <notes>
          <body xmlns="http://www.w3.org/1999/xhtml">
            <p>SUBSYSTEM: Arginine and Proline Metabolism</p>
          </body>
        </notes>
        <listOfReactants>
          <speciesReference species="M_argsuc_c" stoichiometry="1" constant="true"/>
        </listOfReactants>
        <listOfProducts>
          <speciesReference species="M_fum_c" stoichiometry="1" constant="true"/>
          <speciesReference species="M_arg_L_c" stoichiometry="1" constant="true"/>
        </listOfProducts>
        <fbc:geneProductAssociation>
          <fbc:geneProductRef fbc:geneProduct="argH"/>
        </fbc:geneProductAssociation>
      </reaction>
      <reaction metaid="R_R_argG" id="R_R_argG" name="argG" reversible="false" fast="false" fbc:lowerFluxBound="FB3N0" fbc:upperFluxBound="FB4N1000">
        <notes>
          <body xmlns="http://www.w3.org/1999/xhtml">
            <p>SUBSYSTEM: Arginine and Proline Metabolism</p>
          </body>
        </notes>
        <listOfReactants>
          <speciesReference species="M_atp_c" stoichiometry="1" constant="true"/>
          <speciesReference species="M_asp_L_c" stoichiometry="1" constant="true"/>
          <speciesReference species="M_citr_L_c" stoichiometry="1" constant="true"/>
        </listOfReactants>
        <listOfProducts>
          <speciesReference species="M_amp_c" stoichiometry="1" constant="true"/>
          <speciesReference species="M_ppi_c" stoichiometry="1" constant="true"/>
          <speciesReference species="M_argsuc_c" stoichiometry="1" constant="true"/>
        </listOfProducts>
        <fbc:geneProductAssociation>
          <fbc:geneProductRef fbc:geneProduct="argG"/>
        </fbc:geneProductAssociation>
      </reaction>
      <reaction metaid="R_R_NCgl2116" id="R_R_NCgl2116" name="NCgl2116" reversible="false" fast="false" fbc:lowerFluxBound="FB3N0" fbc:upperFluxBound="FB4N1000">
        <notes>
          <body xmlns="http://www.w3.org/1999/xhtml">
            <p>SUBSYSTEM: Alanine and Aspartate Metabolism</p>
          </body>
        </notes>
        <listOfReactants>
          <speciesReference species="M_atp_c" stoichiometry="1" constant="true"/>
          <speciesReference species="M_asp_L_c" stoichiometry="1" constant="true"/>
          <speciesReference species="M_nh3_c" stoichiometry="1" constant="true"/>
        </listOfReactants>
        <listOfProducts>
          <speciesReference species="M_amp_c" stoichiometry="1" constant="true"/>
          <speciesReference species="M_ppi_c" stoichiometry="1" constant="true"/>
          <speciesReference species="M_asn_L_c" stoichiometry="1" constant="true"/>
        </listOfProducts>
        <fbc:geneProductAssociation>
          <fbc:geneProductRef fbc:geneProduct="NCgl2116"/>
        </fbc:geneProductAssociation>
      </reaction>
      <reaction metaid="R_R_ltsA" id="R_R_ltsA" name="ltsA" reversible="false" fast="false" fbc:lowerFluxBound="FB3N0" fbc:upperFluxBound="FB4N1000">
        <notes>
          <body xmlns="http://www.w3.org/1999/xhtml">
            <p>SUBSYSTEM: Alanine and Aspartate Metabolism</p>
          </body>
        </notes>
        <listOfReactants>
          <speciesReference species="M_atp_c" stoichiometry="1" constant="true"/>
          <speciesReference species="M_h2o_c" stoichiometry="1" constant="true"/>
          <speciesReference species="M_gln_L_c" stoichiometry="1" constant="true"/>
          <speciesReference species="M_asp_L_c" stoichiometry="1" constant="true"/>
        </listOfReactants>
        <listOfProducts>
          <speciesReference species="M_amp_c" stoichiometry="1" constant="true"/>
          <speciesReference species="M_glu_L_c" stoichiometry="1" constant="true"/>
          <speciesReference species="M_ppi_c" stoichiometry="1" constant="true"/>
          <speciesReference species="M_asn_L_c" stoichiometry="1" constant="true"/>
        </listOfProducts>
        <fbc:geneProductAssociation>
          <fbc:geneProductRef fbc:geneProduct="ltsA"/>
        </fbc:geneProductAssociation>
      </reaction>
      <reaction metaid="R_R_thrB" id="R_R_thrB" name="thrB" reversible="false" fast="false" fbc:lowerFluxBound="FB3N0" fbc:upperFluxBound="FB4N1000">
        <notes>
          <body xmlns="http://www.w3.org/1999/xhtml">
            <p>SUBSYSTEM: Threonine and Lysine Metabolism</p>
          </body>
        </notes>
        <listOfReactants>
          <speciesReference species="M_atp_c" stoichiometry="1" constant="true"/>
          <speciesReference species="M_hom_L_c" stoichiometry="1" constant="true"/>
        </listOfReactants>
        <listOfProducts>
          <speciesReference species="M_adp_c" stoichiometry="1" constant="true"/>
          <speciesReference species="M_phom_c" stoichiometry="1" constant="true"/>
        </listOfProducts>
        <fbc:geneProductAssociation>
          <fbc:geneProductRef fbc:geneProduct="thrB"/>
        </fbc:geneProductAssociation>
      </reaction>
      <reaction metaid="R_R_thrC" id="R_R_thrC" name="thrC" reversible="false" fast="false" fbc:lowerFluxBound="FB3N0" fbc:upperFluxBound="FB4N1000">
        <notes>
          <body xmlns="http://www.w3.org/1999/xhtml">
            <p>SUBSYSTEM: Threonine and Lysine Metabolism</p>
          </body>
        </notes>
        <listOfReactants>
          <speciesReference species="M_h2o_c" stoichiometry="1" constant="true"/>
          <speciesReference species="M_phom_c" stoichiometry="1" constant="true"/>
        </listOfReactants>
        <listOfProducts>
          <speciesReference species="M_h_c" stoichiometry="3" constant="true"/>
          <speciesReference species="M_pi_c" stoichiometry="1" constant="true"/>
          <speciesReference species="M_thr_L_c" stoichiometry="1" constant="true"/>
        </listOfProducts>
        <fbc:geneProductAssociation>
          <fbc:geneProductRef fbc:geneProduct="thrC"/>
        </fbc:geneProductAssociation>
      </reaction>
      <reaction metaid="R_R_ilvA_ile" id="R_R_ilvA_ile" name="ilvA_ile" reversible="false" fast="false" fbc:lowerFluxBound="FB3N0" fbc:upperFluxBound="FB4N1000">
        <notes>
          <body xmlns="http://www.w3.org/1999/xhtml">
            <p>SUBSYSTEM: Valine Leucine and Isoleucine Metabolism</p>
          </body>
        </notes>
        <listOfReactants>
          <speciesReference species="M_thr_L_c" stoichiometry="1" constant="true"/>
        </listOfReactants>
        <listOfProducts>
          <speciesReference species="M_nh3_c" stoichiometry="1" constant="true"/>
          <speciesReference species="M_2obut_c" stoichiometry="1" constant="true"/>
        </listOfProducts>
        <fbc:geneProductAssociation>
          <fbc:geneProductRef fbc:geneProduct="ilvA_ile"/>
        </fbc:geneProductAssociation>
      </reaction>
      <reaction metaid="R_R_ilvBN_ile" id="R_R_ilvBN_ile" name="ilvBN_ile" reversible="false" fast="false" fbc:lowerFluxBound="FB3N0" fbc:upperFluxBound="FB4N1000">
        <notes>
          <body xmlns="http://www.w3.org/1999/xhtml">
            <p>SUBSYSTEM: Valine Leucine and Isoleucine Metabolism</p>
          </body>
        </notes>
        <listOfReactants>
          <speciesReference species="M_pyr_c" stoichiometry="1" constant="true"/>
          <speciesReference species="M_2obut_c" stoichiometry="1" constant="true"/>
        </listOfReactants>
        <listOfProducts>
          <speciesReference species="M_co2_c" stoichiometry="1" constant="true"/>
          <speciesReference species="M_2ahbut_c" stoichiometry="1" constant="true"/>
        </listOfProducts>
        <fbc:geneProductAssociation>
          <fbc:geneProductRef fbc:geneProduct="ilvBN_ile"/>
        </fbc:geneProductAssociation>
      </reaction>
      <reaction metaid="R_R_ilvC_ile" id="R_R_ilvC_ile" name="ilvC_ile" reversible="false" fast="false" fbc:lowerFluxBound="FB3N0" fbc:upperFluxBound="FB4N1000">
        <notes>
          <body xmlns="http://www.w3.org/1999/xhtml">
            <p>SUBSYSTEM: Valine Leucine and Isoleucine Metabolism</p>
          </body>
        </notes>
        <listOfReactants>
          <speciesReference species="M_h_c" stoichiometry="1" constant="true"/>
          <speciesReference species="M_nadph_c" stoichiometry="1" constant="true"/>
          <speciesReference species="M_2ahbut_c" stoichiometry="1" constant="true"/>
        </listOfReactants>
        <listOfProducts>
          <speciesReference species="M_nadp_c" stoichiometry="1" constant="true"/>
          <speciesReference species="M_23dhmp_c" stoichiometry="1" constant="true"/>
        </listOfProducts>
        <fbc:geneProductAssociation>
          <fbc:geneProductRef fbc:geneProduct="ilvC_ile"/>
        </fbc:geneProductAssociation>
      </reaction>
      <reaction metaid="R_R_ilvE_ile" id="R_R_ilvE_ile" name="ilvE_ile" reversible="false" fast="false" fbc:lowerFluxBound="FB3N0" fbc:upperFluxBound="FB4N1000">
        <notes>
          <body xmlns="http://www.w3.org/1999/xhtml">
            <p>SUBSYSTEM: Valine Leucine and Isoleucine Metabolism</p>
          </body>
        </notes>
        <listOfReactants>
          <speciesReference species="M_glu_L_c" stoichiometry="1" constant="true"/>
          <speciesReference species="M_3mop_c" stoichiometry="1" constant="true"/>
        </listOfReactants>
        <listOfProducts>
          <speciesReference species="M_akg_c" stoichiometry="1" constant="true"/>
          <speciesReference species="M_ile_L_c" stoichiometry="1" constant="true"/>
        </listOfProducts>
        <fbc:geneProductAssociation>
          <fbc:geneProductRef fbc:geneProduct="ilvE_ile"/>
        </fbc:geneProductAssociation>
      </reaction>
      <reaction metaid="R_R_ilvD_ile" id="R_R_ilvD_ile" name="ilvD_ile" reversible="true" fast="false" fbc:lowerFluxBound="FB1N1000" fbc:upperFluxBound="FB4N1000">
        <notes>
          <body xmlns="http://www.w3.org/1999/xhtml">
            <p>SUBSYSTEM: Valine Leucine and Isoleucine Metabolism</p>
          </body>
        </notes>
        <listOfReactants>
          <speciesReference species="M_23dhmp_c" stoichiometry="1" constant="true"/>
        </listOfReactants>
        <listOfProducts>
          <speciesReference species="M_h2o_c" stoichiometry="1" constant="true"/>
          <speciesReference species="M_3mop_c" stoichiometry="1" constant="true"/>
        </listOfProducts>
        <fbc:geneProductAssociation>
          <fbc:geneProductRef fbc:geneProduct="ilvD_ile"/>
        </fbc:geneProductAssociation>
      </reaction>
      <reaction metaid="R_R_leuA" id="R_R_leuA" name="leuA" reversible="false" fast="false" fbc:lowerFluxBound="FB3N0" fbc:upperFluxBound="FB4N1000">
        <notes>
          <body xmlns="http://www.w3.org/1999/xhtml">
            <p>SUBSYSTEM: Valine Leucine and Isoleucine Metabolism</p>
          </body>
        </notes>
        <listOfReactants>
          <speciesReference species="M_h2o_c" stoichiometry="1" constant="true"/>
          <speciesReference species="M_accoa_c" stoichiometry="1" constant="true"/>
          <speciesReference species="M_3mob_c" stoichiometry="1" constant="true"/>
        </listOfReactants>
        <listOfProducts>
          <speciesReference species="M_coa_c" stoichiometry="1" constant="true"/>
          <speciesReference species="M_3c3hmp_c" stoichiometry="1" constant="true"/>
        </listOfProducts>
        <fbc:geneProductAssociation>
          <fbc:geneProductRef fbc:geneProduct="leuA"/>
        </fbc:geneProductAssociation>
      </reaction>
      <reaction metaid="R_R_leuE" id="R_R_leuE" name="leuE" reversible="true" fast="false" fbc:lowerFluxBound="FB1N1000" fbc:upperFluxBound="FB4N1000">
        <notes>
          <body xmlns="http://www.w3.org/1999/xhtml">
            <p>SUBSYSTEM: Valine Leucine and Isoleucine Metabolism</p>
          </body>
        </notes>
        <listOfReactants>
          <speciesReference species="M_3c3hmp_c" stoichiometry="1" constant="true"/>
        </listOfReactants>
        <listOfProducts>
          <speciesReference species="M_h2o_c" stoichiometry="1" constant="true"/>
          <speciesReference species="M_2ippm_c" stoichiometry="1" constant="true"/>
        </listOfProducts>
        <fbc:geneProductAssociation>
          <fbc:geneProductRef fbc:geneProduct="leuE"/>
        </fbc:geneProductAssociation>
      </reaction>
      <reaction metaid="R_R_leuCD" id="R_R_leuCD" name="leuCD" reversible="false" fast="false" fbc:lowerFluxBound="FB3N0" fbc:upperFluxBound="FB4N1000">
        <notes>
          <body xmlns="http://www.w3.org/1999/xhtml">
            <p>SUBSYSTEM: Valine Leucine and Isoleucine Metabolism</p>
          </body>
        </notes>
        <listOfReactants>
          <speciesReference species="M_h2o_c" stoichiometry="1" constant="true"/>
          <speciesReference species="M_2ippm_c" stoichiometry="1" constant="true"/>
        </listOfReactants>
        <listOfProducts>
          <speciesReference species="M_3c2hmp_c" stoichiometry="1" constant="true"/>
        </listOfProducts>
        <fbc:geneProductAssociation>
          <fbc:geneProductRef fbc:geneProduct="leuCD"/>
        </fbc:geneProductAssociation>
      </reaction>
      <reaction metaid="R_R_ilvE" id="R_R_ilvE" name="ilvE" reversible="false" fast="false" fbc:lowerFluxBound="FB3N0" fbc:upperFluxBound="FB4N1000">
        <notes>
          <body xmlns="http://www.w3.org/1999/xhtml">
            <p>SUBSYSTEM: Valine Leucine and Isoleucine Metabolism</p>
          </body>
        </notes>
        <listOfReactants>
          <speciesReference species="M_glu_L_c" stoichiometry="1" constant="true"/>
          <speciesReference species="M_4mop_c" stoichiometry="1" constant="true"/>
        </listOfReactants>
        <listOfProducts>
          <speciesReference species="M_akg_c" stoichiometry="1" constant="true"/>
          <speciesReference species="M_leu_L_c" stoichiometry="1" constant="true"/>
        </listOfProducts>
        <fbc:geneProductAssociation>
          <fbc:geneProductRef fbc:geneProduct="ilvE"/>
        </fbc:geneProductAssociation>
      </reaction>
      <reaction metaid="R_R_leuB" id="R_R_leuB" name="leuB" reversible="false" fast="false" fbc:lowerFluxBound="FB3N0" fbc:upperFluxBound="FB4N1000">
        <notes>
          <body xmlns="http://www.w3.org/1999/xhtml">
            <p>SUBSYSTEM: Valine Leucine and Isoleucine Metabolism</p>
          </body>
        </notes>
        <listOfReactants>
          <speciesReference species="M_nad_c" stoichiometry="1" constant="true"/>
          <speciesReference species="M_3c2hmp_c" stoichiometry="1" constant="true"/>
        </listOfReactants>
        <listOfProducts>
          <speciesReference species="M_h_c" stoichiometry="1" constant="true"/>
          <speciesReference species="M_nadh_c" stoichiometry="1" constant="true"/>
          <speciesReference species="M_3c4mop_c" stoichiometry="1" constant="true"/>
        </listOfProducts>
        <fbc:geneProductAssociation>
          <fbc:geneProductRef fbc:geneProduct="leuB"/>
        </fbc:geneProductAssociation>
      </reaction>
      <reaction metaid="R_R_leuP" id="R_R_leuP" name="leuP" reversible="false" fast="false" fbc:lowerFluxBound="FB3N0" fbc:upperFluxBound="FB4N1000">
        <notes>
          <body xmlns="http://www.w3.org/1999/xhtml">
            <p>SUBSYSTEM: Valine Leucine and Isoleucine Metabolism</p>
          </body>
        </notes>
        <listOfReactants>
          <speciesReference species="M_3c4mop_c" stoichiometry="1" constant="true"/>
        </listOfReactants>
        <listOfProducts>
          <speciesReference species="M_co2_c" stoichiometry="1" constant="true"/>
          <speciesReference species="M_4mop_c" stoichiometry="1" constant="true"/>
        </listOfProducts>
        <fbc:geneProductAssociation>
          <fbc:geneProductRef fbc:geneProduct="leuP"/>
        </fbc:geneProductAssociation>
      </reaction>
      <reaction metaid="R_R_proB" id="R_R_proB" name="proB" reversible="false" fast="false" fbc:lowerFluxBound="FB3N0" fbc:upperFluxBound="FB4N1000">
        <notes>
          <body xmlns="http://www.w3.org/1999/xhtml">
            <p>SUBSYSTEM: Arginine and Proline Metabolism</p>
          </body>
        </notes>
        <listOfReactants>
          <speciesReference species="M_atp_c" stoichiometry="1" constant="true"/>
          <speciesReference species="M_glu_L_c" stoichiometry="1" constant="true"/>
        </listOfReactants>
        <listOfProducts>
          <speciesReference species="M_adp_c" stoichiometry="1" constant="true"/>
          <speciesReference species="M_glu5p_c" stoichiometry="1" constant="true"/>
        </listOfProducts>
        <fbc:geneProductAssociation>
          <fbc:geneProductRef fbc:geneProduct="proB"/>
        </fbc:geneProductAssociation>
      </reaction>
      <reaction metaid="R_R_proA" id="R_R_proA" name="proA" reversible="false" fast="false" fbc:lowerFluxBound="FB3N0" fbc:upperFluxBound="FB4N1000">
        <notes>
          <body xmlns="http://www.w3.org/1999/xhtml">
            <p>SUBSYSTEM: Arginine and Proline Metabolism</p>
          </body>
        </notes>
        <listOfReactants>
          <speciesReference species="M_nadph_c" stoichiometry="1" constant="true"/>
          <speciesReference species="M_glu5p_c" stoichiometry="1" constant="true"/>
        </listOfReactants>
        <listOfProducts>
          <speciesReference species="M_h_c" stoichiometry="2" constant="true"/>
          <speciesReference species="M_pi_c" stoichiometry="1" constant="true"/>
          <speciesReference species="M_nadp_c" stoichiometry="1" constant="true"/>
          <speciesReference species="M_glu5sa_c" stoichiometry="1" constant="true"/>
        </listOfProducts>
        <fbc:geneProductAssociation>
          <fbc:geneProductRef fbc:geneProduct="proA"/>
        </fbc:geneProductAssociation>
      </reaction>
      <reaction metaid="R_R_proC" id="R_R_proC" name="proC" reversible="false" fast="false" fbc:lowerFluxBound="FB3N0" fbc:upperFluxBound="FB4N1000">
        <notes>
          <body xmlns="http://www.w3.org/1999/xhtml">
            <p>SUBSYSTEM: Arginine and Proline Metabolism</p>
          </body>
        </notes>
        <listOfReactants>
          <speciesReference species="M_h_c" stoichiometry="1" constant="true"/>
          <speciesReference species="M_nadph_c" stoichiometry="1" constant="true"/>
          <speciesReference species="M_1pyr5c_c" stoichiometry="1" constant="true"/>
        </listOfReactants>
        <listOfProducts>
          <speciesReference species="M_nadp_c" stoichiometry="1" constant="true"/>
          <speciesReference species="M_pro_L_c" stoichiometry="1" constant="true"/>
        </listOfProducts>
        <fbc:geneProductAssociation>
          <fbc:geneProductRef fbc:geneProduct="proC"/>
        </fbc:geneProductAssociation>
      </reaction>
      <reaction metaid="R_R_rGLUGSAL" id="R_R_rGLUGSAL" name="rGLUGSAL" reversible="true" fast="false" fbc:lowerFluxBound="FB1N1000" fbc:upperFluxBound="FB4N1000">
        <notes>
          <body xmlns="http://www.w3.org/1999/xhtml">
            <p>SUBSYSTEM: Arginine and Proline Metabolism</p>
          </body>
        </notes>
        <listOfReactants>
          <speciesReference species="M_glu5sa_c" stoichiometry="1" constant="true"/>
        </listOfReactants>
        <listOfProducts>
          <speciesReference species="M_h2o_c" stoichiometry="1" constant="true"/>
          <speciesReference species="M_1pyr5c_c" stoichiometry="1" constant="true"/>
        </listOfProducts>
        <fbc:geneProductAssociation>
          <fbc:geneProductRef fbc:geneProduct="rGLUGSAL"/>
        </fbc:geneProductAssociation>
      </reaction>
      <reaction metaid="R_R_serA" id="R_R_serA" name="serA" reversible="false" fast="false" fbc:lowerFluxBound="FB3N0" fbc:upperFluxBound="FB4N1000">
        <notes>
          <body xmlns="http://www.w3.org/1999/xhtml">
            <p>SUBSYSTEM: Glycine and Serine Metabolism</p>
          </body>
        </notes>
        <listOfReactants>
          <speciesReference species="M_nad_c" stoichiometry="1" constant="true"/>
          <speciesReference species="M_3pg_c" stoichiometry="1" constant="true"/>
        </listOfReactants>
        <listOfProducts>
          <speciesReference species="M_h_c" stoichiometry="1" constant="true"/>
          <speciesReference species="M_nadh_c" stoichiometry="1" constant="true"/>
          <speciesReference species="M_3php_c" stoichiometry="1" constant="true"/>
        </listOfProducts>
        <fbc:geneProductAssociation>
          <fbc:geneProductRef fbc:geneProduct="serA"/>
        </fbc:geneProductAssociation>
      </reaction>
      <reaction metaid="R_R_serB" id="R_R_serB" name="serB" reversible="false" fast="false" fbc:lowerFluxBound="FB3N0" fbc:upperFluxBound="FB4N1000">
        <notes>
          <body xmlns="http://www.w3.org/1999/xhtml">
            <p>SUBSYSTEM: Glycine and Serine Metabolism</p>
          </body>
        </notes>
        <listOfReactants>
          <speciesReference species="M_h2o_c" stoichiometry="1" constant="true"/>
          <speciesReference species="M_pser_L_c" stoichiometry="1" constant="true"/>
        </listOfReactants>
        <listOfProducts>
          <speciesReference species="M_h_c" stoichiometry="3" constant="true"/>
          <speciesReference species="M_pi_c" stoichiometry="1" constant="true"/>
          <speciesReference species="M_ser_L_c" stoichiometry="1" constant="true"/>
        </listOfProducts>
        <fbc:geneProductAssociation>
          <fbc:geneProductRef fbc:geneProduct="serB"/>
        </fbc:geneProductAssociation>
      </reaction>
      <reaction metaid="R_R_serC" id="R_R_serC" name="serC" reversible="false" fast="false" fbc:lowerFluxBound="FB3N0" fbc:upperFluxBound="FB4N1000">
        <notes>
          <body xmlns="http://www.w3.org/1999/xhtml">
            <p>SUBSYSTEM: Glycine and Serine Metabolism</p>
          </body>
        </notes>
        <listOfReactants>
          <speciesReference species="M_glu_L_c" stoichiometry="1" constant="true"/>
          <speciesReference species="M_3php_c" stoichiometry="1" constant="true"/>
        </listOfReactants>
        <listOfProducts>
          <speciesReference species="M_akg_c" stoichiometry="1" constant="true"/>
          <speciesReference species="M_pser_L_c" stoichiometry="1" constant="true"/>
        </listOfProducts>
        <fbc:geneProductAssociation>
          <fbc:geneProductRef fbc:geneProduct="serC"/>
        </fbc:geneProductAssociation>
      </reaction>
      <reaction metaid="R_R_sdaA" id="R_R_sdaA" name="sdaA" reversible="false" fast="false" fbc:lowerFluxBound="FB3N0" fbc:upperFluxBound="FB3N0">
        <notes>
          <body xmlns="http://www.w3.org/1999/xhtml">
            <p>SUBSYSTEM: Glycine and Serine Metabolism</p>
          </body>
        </notes>
        <listOfReactants>
          <speciesReference species="M_ser_L_c" stoichiometry="1" constant="true"/>
        </listOfReactants>
        <listOfProducts>
          <speciesReference species="M_pyr_c" stoichiometry="1" constant="true"/>
          <speciesReference species="M_nh3_c" stoichiometry="1" constant="true"/>
        </listOfProducts>
        <fbc:geneProductAssociation>
          <fbc:geneProductRef fbc:geneProduct="sdaA"/>
        </fbc:geneProductAssociation>
      </reaction>
      <reaction metaid="R_R_csm" id="R_R_csm" name="csm" reversible="false" fast="false" fbc:lowerFluxBound="FB3N0" fbc:upperFluxBound="FB4N1000">
        <notes>
          <body xmlns="http://www.w3.org/1999/xhtml">
            <p>SUBSYSTEM: Tyrosine Tryptophan and Phenylalanine Metabolism</p>
          </body>
        </notes>
        <listOfReactants>
          <speciesReference species="M_chor_c" stoichiometry="1" constant="true"/>
        </listOfReactants>
        <listOfProducts>
          <speciesReference species="M_pphn_c" stoichiometry="1" constant="true"/>
        </listOfProducts>
        <fbc:geneProductAssociation>
          <fbc:geneProductRef fbc:geneProduct="csm"/>
        </fbc:geneProductAssociation>
      </reaction>
      <reaction metaid="R_R_tyrA" id="R_R_tyrA" name="tyrA" reversible="false" fast="false" fbc:lowerFluxBound="FB3N0" fbc:upperFluxBound="FB4N1000">
        <notes>
          <body xmlns="http://www.w3.org/1999/xhtml">
            <p>SUBSYSTEM: Tyrosine Tryptophan and Phenylalanine Metabolism</p>
          </body>
        </notes>
        <listOfReactants>
          <speciesReference species="M_nad_c" stoichiometry="1" constant="true"/>
          <speciesReference species="M_pphn_c" stoichiometry="1" constant="true"/>
        </listOfReactants>
        <listOfProducts>
          <speciesReference species="M_h_c" stoichiometry="1" constant="true"/>
          <speciesReference species="M_nadh_c" stoichiometry="1" constant="true"/>
          <speciesReference species="M_co2_c" stoichiometry="1" constant="true"/>
          <speciesReference species="M_34hpp_c" stoichiometry="1" constant="true"/>
        </listOfProducts>
        <fbc:geneProductAssociation>
          <fbc:geneProductRef fbc:geneProduct="tyrA"/>
        </fbc:geneProductAssociation>
      </reaction>
      <reaction metaid="R_R_r2_6_1_57" id="R_R_r2_6_1_57" name="r2.6.1.57" reversible="false" fast="false" fbc:lowerFluxBound="FB3N0" fbc:upperFluxBound="FB4N1000">
        <notes>
          <body xmlns="http://www.w3.org/1999/xhtml">
            <p>SUBSYSTEM: Tyrosine Tryptophan and Phenylalanine Metabolism</p>
          </body>
        </notes>
        <listOfReactants>
          <speciesReference species="M_glu_L_c" stoichiometry="1" constant="true"/>
          <speciesReference species="M_34hpp_c" stoichiometry="1" constant="true"/>
        </listOfReactants>
        <listOfProducts>
          <speciesReference species="M_akg_c" stoichiometry="1" constant="true"/>
          <speciesReference species="M_tyr_L_c" stoichiometry="1" constant="true"/>
        </listOfProducts>
        <fbc:geneProductAssociation>
          <fbc:geneProductRef fbc:geneProduct="r2__46__6__46__1__46__57"/>
        </fbc:geneProductAssociation>
      </reaction>
      <reaction metaid="R_R_trpB" id="R_R_trpB" name="trpB" reversible="true" fast="false" fbc:lowerFluxBound="FB1N1000" fbc:upperFluxBound="FB4N1000">
        <notes>
          <body xmlns="http://www.w3.org/1999/xhtml">
            <p>SUBSYSTEM: Tyrosine Tryptophan and Phenylalanine Metabolism</p>
          </body>
        </notes>
        <listOfReactants>
          <speciesReference species="M_ser_L_c" stoichiometry="1" constant="true"/>
          <speciesReference species="M_3ig3p_c" stoichiometry="1" constant="true"/>
        </listOfReactants>
        <listOfProducts>
          <speciesReference species="M_h2o_c" stoichiometry="1" constant="true"/>
          <speciesReference species="M_g3p_c" stoichiometry="1" constant="true"/>
          <speciesReference species="M_trp_L_c" stoichiometry="1" constant="true"/>
        </listOfProducts>
        <fbc:geneProductAssociation>
          <fbc:geneProductRef fbc:geneProduct="trpB"/>
        </fbc:geneProductAssociation>
      </reaction>
      <reaction metaid="R_trpEG" id="R_trpEG" name="trpEG" reversible="false" fast="false" fbc:lowerFluxBound="FB3N0" fbc:upperFluxBound="FB4N1000">
        <notes>
          <body xmlns="http://www.w3.org/1999/xhtml">
            <p>SUBSYSTEM: Tyrosine Tryptophan and Phenylalanine Metabolism</p>
          </body>
        </notes>
        <listOfReactants>
          <speciesReference species="M_gln_L_c" stoichiometry="1" constant="true"/>
          <speciesReference species="M_chor_c" stoichiometry="1" constant="true"/>
        </listOfReactants>
        <listOfProducts>
          <speciesReference species="M_pyr_c" stoichiometry="1" constant="true"/>
          <speciesReference species="M_glu_L_c" stoichiometry="1" constant="true"/>
          <speciesReference species="M_anth_c" stoichiometry="1" constant="true"/>
        </listOfProducts>
        <fbc:geneProductAssociation>
          <fbc:geneProductRef fbc:geneProduct="trpEG"/>
        </fbc:geneProductAssociation>
      </reaction>
      <reaction metaid="R_R_trpD" id="R_R_trpD" name="trpD" reversible="false" fast="false" fbc:lowerFluxBound="FB3N0" fbc:upperFluxBound="FB4N1000">
        <notes>
          <body xmlns="http://www.w3.org/1999/xhtml">
            <p>SUBSYSTEM: Tyrosine Tryptophan and Phenylalanine Metabolism</p>
          </body>
        </notes>
        <listOfReactants>
          <speciesReference species="M_prpp_c" stoichiometry="1" constant="true"/>
          <speciesReference species="M_anth_c" stoichiometry="1" constant="true"/>
        </listOfReactants>
        <listOfProducts>
          <speciesReference species="M_ppi_c" stoichiometry="1" constant="true"/>
          <speciesReference species="M_pran_c" stoichiometry="1" constant="true"/>
        </listOfProducts>
        <fbc:geneProductAssociation>
          <fbc:geneProductRef fbc:geneProduct="trpD"/>
        </fbc:geneProductAssociation>
      </reaction>
      <reaction metaid="R_R_trpC" id="R_R_trpC" name="trpC" reversible="false" fast="false" fbc:lowerFluxBound="FB3N0" fbc:upperFluxBound="FB4N1000">
        <notes>
          <body xmlns="http://www.w3.org/1999/xhtml">
            <p>SUBSYSTEM: Tyrosine Tryptophan and Phenylalanine Metabolism</p>
          </body>
        </notes>
        <listOfReactants>
          <speciesReference species="M_pran_c" stoichiometry="1" constant="true"/>
        </listOfReactants>
        <listOfProducts>
          <speciesReference species="M_2cpr5p_c" stoichiometry="1" constant="true"/>
        </listOfProducts>
        <fbc:geneProductAssociation>
          <fbc:geneProductRef fbc:geneProduct="trpC"/>
        </fbc:geneProductAssociation>
      </reaction>
      <reaction metaid="R_R_trpA" id="R_R_trpA" name="trpA" reversible="false" fast="false" fbc:lowerFluxBound="FB3N0" fbc:upperFluxBound="FB4N1000">
        <notes>
          <body xmlns="http://www.w3.org/1999/xhtml">
            <p>SUBSYSTEM: Tyrosine Tryptophan and Phenylalanine Metabolism</p>
          </body>
        </notes>
        <listOfReactants>
          <speciesReference species="M_2cpr5p_c" stoichiometry="1" constant="true"/>
        </listOfReactants>
        <listOfProducts>
          <speciesReference species="M_h2o_c" stoichiometry="1" constant="true"/>
          <speciesReference species="M_co2_c" stoichiometry="1" constant="true"/>
          <speciesReference species="M_3ig3p_c" stoichiometry="1" constant="true"/>
        </listOfProducts>
        <fbc:geneProductAssociation>
          <fbc:geneProductRef fbc:geneProduct="trpA"/>
        </fbc:geneProductAssociation>
      </reaction>
      <reaction metaid="R_R_cysKM" id="R_R_cysKM" name="cysKM" reversible="false" fast="false" fbc:lowerFluxBound="FB3N0" fbc:upperFluxBound="FB4N1000">
        <notes>
          <body xmlns="http://www.w3.org/1999/xhtml">
            <p>SUBSYSTEM: Cysteine Metabolism</p>
          </body>
        </notes>
        <listOfReactants>
          <speciesReference species="M_h2s_c" stoichiometry="1" constant="true"/>
          <speciesReference species="M_acser_c" stoichiometry="1" constant="true"/>
        </listOfReactants>
        <listOfProducts>
          <speciesReference species="M_h_c" stoichiometry="1" constant="true"/>
          <speciesReference species="M_ac_c" stoichiometry="1" constant="true"/>
          <speciesReference species="M_cys_L_c" stoichiometry="1" constant="true"/>
        </listOfProducts>
        <fbc:geneProductAssociation>
          <fbc:geneProductRef fbc:geneProduct="cysKM"/>
        </fbc:geneProductAssociation>
      </reaction>
      <reaction metaid="R_R_cysE" id="R_R_cysE" name="cysE" reversible="false" fast="false" fbc:lowerFluxBound="FB3N0" fbc:upperFluxBound="FB4N1000">
        <notes>
          <body xmlns="http://www.w3.org/1999/xhtml">
            <p>SUBSYSTEM: Cysteine Metabolism</p>
          </body>
        </notes>
        <listOfReactants>
          <speciesReference species="M_accoa_c" stoichiometry="1" constant="true"/>
          <speciesReference species="M_ser_L_c" stoichiometry="1" constant="true"/>
        </listOfReactants>
        <listOfProducts>
          <speciesReference species="M_coa_c" stoichiometry="1" constant="true"/>
          <speciesReference species="M_acser_c" stoichiometry="1" constant="true"/>
        </listOfProducts>
        <fbc:geneProductAssociation>
          <fbc:geneProductRef fbc:geneProduct="cysE"/>
        </fbc:geneProductAssociation>
      </reaction>
      <reaction metaid="R_R_NCgl0215" id="R_R_NCgl0215" name="NCgl0215" reversible="false" fast="false" fbc:lowerFluxBound="FB3N0" fbc:upperFluxBound="FB4N1000">
        <notes>
          <body xmlns="http://www.w3.org/1999/xhtml">
            <p>SUBSYSTEM: </p>
          </body>
        </notes>
        <listOfReactants>
          <speciesReference species="M_glu_L_c" stoichiometry="1" constant="true"/>
          <speciesReference species="M_phpyr_c" stoichiometry="1" constant="true"/>
        </listOfReactants>
        <listOfProducts>
          <speciesReference species="M_akg_c" stoichiometry="1" constant="true"/>
          <speciesReference species="M_phe_L_c" stoichiometry="1" constant="true"/>
        </listOfProducts>
        <fbc:geneProductAssociation/>
      </reaction>
      <reaction metaid="R_R_pheA" id="R_R_pheA" name="pheA" reversible="false" fast="false" fbc:lowerFluxBound="FB3N0" fbc:upperFluxBound="FB4N1000">
        <notes>
          <body xmlns="http://www.w3.org/1999/xhtml">
            <p>SUBSYSTEM: Tyrosine Tryptophan and Phenylalanine Metabolism</p>
          </body>
        </notes>
        <listOfReactants>
          <speciesReference species="M_pphn_c" stoichiometry="1" constant="true"/>
        </listOfReactants>
        <listOfProducts>
          <speciesReference species="M_h2o_c" stoichiometry="1" constant="true"/>
          <speciesReference species="M_co2_c" stoichiometry="1" constant="true"/>
          <speciesReference species="M_phpyr_c" stoichiometry="1" constant="true"/>
        </listOfProducts>
        <fbc:geneProductAssociation>
          <fbc:geneProductRef fbc:geneProduct="pheA"/>
        </fbc:geneProductAssociation>
      </reaction>
      <reaction metaid="R_R_glyA" id="R_R_glyA" name="glyA" reversible="true" fast="false" fbc:lowerFluxBound="FB1N1000" fbc:upperFluxBound="FB4N1000">
        <notes>
          <body xmlns="http://www.w3.org/1999/xhtml">
            <p>SUBSYSTEM: Glycine and Serine Metabolism</p>
          </body>
        </notes>
        <listOfReactants>
          <speciesReference species="M_ser_L_c" stoichiometry="1" constant="true"/>
          <speciesReference species="M_thf_c" stoichiometry="1" constant="true"/>
        </listOfReactants>
        <listOfProducts>
          <speciesReference species="M_h2o_c" stoichiometry="1" constant="true"/>
          <speciesReference species="M_gly_c" stoichiometry="1" constant="true"/>
          <speciesReference species="M_mlthf_c" stoichiometry="1" constant="true"/>
        </listOfProducts>
        <fbc:geneProductAssociation>
          <fbc:geneProductRef fbc:geneProduct="glyA"/>
        </fbc:geneProductAssociation>
      </reaction>
      <reaction metaid="R_R_metH" id="R_R_metH" name="metH" reversible="true" fast="false" fbc:lowerFluxBound="FB1N1000" fbc:upperFluxBound="FB4N1000">
        <notes>
          <body xmlns="http://www.w3.org/1999/xhtml">
            <p>SUBSYSTEM: Methionine Metabolism</p>
          </body>
        </notes>
        <listOfReactants>
          <speciesReference species="M_5mthf_c" stoichiometry="1" constant="true"/>
          <speciesReference species="M_hcys_L_c" stoichiometry="1" constant="true"/>
        </listOfReactants>
        <listOfProducts>
          <speciesReference species="M_thf_c" stoichiometry="1" constant="true"/>
          <speciesReference species="M_met_L_c" stoichiometry="1" constant="true"/>
        </listOfProducts>
        <fbc:geneProductAssociation>
          <fbc:geneProductRef fbc:geneProduct="metH"/>
        </fbc:geneProductAssociation>
      </reaction>
      <reaction metaid="R_R_aecD" id="R_R_aecD" name="aecD" reversible="true" fast="false" fbc:lowerFluxBound="FB1N1000" fbc:upperFluxBound="FB4N1000">
        <notes>
          <body xmlns="http://www.w3.org/1999/xhtml">
            <p>SUBSYSTEM: Methionine Metabolism</p>
          </body>
        </notes>
        <listOfReactants>
          <speciesReference species="M_h2o_c" stoichiometry="1" constant="true"/>
          <speciesReference species="M_cyst_L_c" stoichiometry="1" constant="true"/>
        </listOfReactants>
        <listOfProducts>
          <speciesReference species="M_pyr_c" stoichiometry="1" constant="true"/>
          <speciesReference species="M_nh3_c" stoichiometry="1" constant="true"/>
          <speciesReference species="M_hcys_L_c" stoichiometry="1" constant="true"/>
        </listOfProducts>
        <fbc:geneProductAssociation>
          <fbc:geneProductRef fbc:geneProduct="metC"/>
        </fbc:geneProductAssociation>
      </reaction>
      <reaction metaid="R_R_metB" id="R_R_metB" name="metB" reversible="false" fast="false" fbc:lowerFluxBound="FB3N0" fbc:upperFluxBound="FB4N1000">
        <notes>
          <body xmlns="http://www.w3.org/1999/xhtml">
            <p>SUBSYSTEM: Methionine Metabolism</p>
          </body>
        </notes>
        <listOfReactants>
          <speciesReference species="M_cys_L_c" stoichiometry="1" constant="true"/>
          <speciesReference species="M_achms_c" stoichiometry="1" constant="true"/>
        </listOfReactants>
        <listOfProducts>
          <speciesReference species="M_h_c" stoichiometry="1" constant="true"/>
          <speciesReference species="M_ac_c" stoichiometry="1" constant="true"/>
          <speciesReference species="M_cyst_L_c" stoichiometry="1" constant="true"/>
        </listOfProducts>
        <fbc:geneProductAssociation>
          <fbc:geneProductRef fbc:geneProduct="metB"/>
        </fbc:geneProductAssociation>
      </reaction>
      <reaction metaid="R_R_metX" id="R_R_metX" name="metX" reversible="false" fast="false" fbc:lowerFluxBound="FB3N0" fbc:upperFluxBound="FB4N1000">
        <notes>
          <body xmlns="http://www.w3.org/1999/xhtml">
            <p>SUBSYSTEM: Methionine Metabolism</p>
          </body>
        </notes>
        <listOfReactants>
          <speciesReference species="M_accoa_c" stoichiometry="1" constant="true"/>
          <speciesReference species="M_hom_L_c" stoichiometry="1" constant="true"/>
        </listOfReactants>
        <listOfProducts>
          <speciesReference species="M_coa_c" stoichiometry="1" constant="true"/>
          <speciesReference species="M_achms_c" stoichiometry="1" constant="true"/>
        </listOfProducts>
        <fbc:geneProductAssociation>
          <fbc:geneProductRef fbc:geneProduct="metX"/>
        </fbc:geneProductAssociation>
      </reaction>
      <reaction metaid="R_R_metY" id="R_R_metY" name="metY" reversible="false" fast="false" fbc:lowerFluxBound="FB3N0" fbc:upperFluxBound="FB4N1000">
        <notes>
          <body xmlns="http://www.w3.org/1999/xhtml">
            <p>SUBSYSTEM: Methionine Metabolism</p>
          </body>
        </notes>
        <listOfReactants>
          <speciesReference species="M_h2s_c" stoichiometry="1" constant="true"/>
          <speciesReference species="M_achms_c" stoichiometry="1" constant="true"/>
        </listOfReactants>
        <listOfProducts>
          <speciesReference species="M_h_c" stoichiometry="1" constant="true"/>
          <speciesReference species="M_ac_c" stoichiometry="1" constant="true"/>
          <speciesReference species="M_hcys_L_c" stoichiometry="1" constant="true"/>
        </listOfProducts>
        <fbc:geneProductAssociation>
          <fbc:geneProductRef fbc:geneProduct="metY"/>
        </fbc:geneProductAssociation>
      </reaction>
      <reaction metaid="R_R_sahH" id="R_R_sahH" name="sahH" reversible="true" fast="false" fbc:lowerFluxBound="FB1N1000" fbc:upperFluxBound="FB4N1000">
        <notes>
          <body xmlns="http://www.w3.org/1999/xhtml">
            <p>SUBSYSTEM: Methionine Metabolism</p>
          </body>
        </notes>
        <listOfReactants>
          <speciesReference species="M_h2o_c" stoichiometry="1" constant="true"/>
          <speciesReference species="M_ahcys_c" stoichiometry="1" constant="true"/>
        </listOfReactants>
        <listOfProducts>
          <speciesReference species="M_adn_c" stoichiometry="1" constant="true"/>
          <speciesReference species="M_hcys_L_c" stoichiometry="1" constant="true"/>
        </listOfProducts>
        <fbc:geneProductAssociation>
          <fbc:geneProductRef fbc:geneProduct="ahcY"/>
        </fbc:geneProductAssociation>
      </reaction>
      <reaction metaid="R_R_metK" id="R_R_metK" name="metK" reversible="false" fast="false" fbc:lowerFluxBound="FB3N0" fbc:upperFluxBound="FB4N1000">
        <notes>
          <body xmlns="http://www.w3.org/1999/xhtml">
            <p>SUBSYSTEM: Methionine Metabolism</p>
          </body>
        </notes>
        <listOfReactants>
          <speciesReference species="M_atp_c" stoichiometry="1" constant="true"/>
          <speciesReference species="M_h2o_c" stoichiometry="1" constant="true"/>
          <speciesReference species="M_met_L_c" stoichiometry="1" constant="true"/>
        </listOfReactants>
        <listOfProducts>
          <speciesReference species="M_h_c" stoichiometry="2" constant="true"/>
          <speciesReference species="M_pi_c" stoichiometry="1" constant="true"/>
          <speciesReference species="M_ppi_c" stoichiometry="1" constant="true"/>
          <speciesReference species="M_amet_c" stoichiometry="1" constant="true"/>
        </listOfProducts>
        <fbc:geneProductAssociation>
          <fbc:geneProductRef fbc:geneProduct="metK"/>
        </fbc:geneProductAssociation>
      </reaction>
      <reaction metaid="R_R_hisG" id="R_R_hisG" name="hisG" reversible="false" fast="false" fbc:lowerFluxBound="FB3N0" fbc:upperFluxBound="FB4N1000">
        <notes>
          <body xmlns="http://www.w3.org/1999/xhtml">
            <p>SUBSYSTEM: Histidine Metabolism</p>
          </body>
        </notes>
        <listOfReactants>
          <speciesReference species="M_atp_c" stoichiometry="1" constant="true"/>
          <speciesReference species="M_prpp_c" stoichiometry="1" constant="true"/>
        </listOfReactants>
        <listOfProducts>
          <speciesReference species="M_ppi_c" stoichiometry="1" constant="true"/>
          <speciesReference species="M_prbatp_c" stoichiometry="1" constant="true"/>
        </listOfProducts>
        <fbc:geneProductAssociation>
          <fbc:geneProductRef fbc:geneProduct="hisG"/>
        </fbc:geneProductAssociation>
      </reaction>
      <reaction metaid="R_R_hisI" id="R_R_hisI" name="hisI" reversible="false" fast="false" fbc:lowerFluxBound="FB3N0" fbc:upperFluxBound="FB4N1000">
        <notes>
          <body xmlns="http://www.w3.org/1999/xhtml">
            <p>SUBSYSTEM: Histidine Metabolism</p>
          </body>
        </notes>
        <listOfReactants>
          <speciesReference species="M_h2o_c" stoichiometry="1" constant="true"/>
          <speciesReference species="M_prbamp_c" stoichiometry="1" constant="true"/>
        </listOfReactants>
        <listOfProducts>
          <speciesReference species="M_prfp_c" stoichiometry="1" constant="true"/>
        </listOfProducts>
        <fbc:geneProductAssociation>
          <fbc:geneProductRef fbc:geneProduct="hisI_2"/>
        </fbc:geneProductAssociation>
      </reaction>
      <reaction metaid="R_R_hisE" id="R_R_hisE" name="hisE" reversible="false" fast="false" fbc:lowerFluxBound="FB3N0" fbc:upperFluxBound="FB4N1000">
        <notes>
          <body xmlns="http://www.w3.org/1999/xhtml">
            <p>SUBSYSTEM: Histidine Metabolism</p>
          </body>
        </notes>
        <listOfReactants>
          <speciesReference species="M_h2o_c" stoichiometry="1" constant="true"/>
          <speciesReference species="M_prbatp_c" stoichiometry="1" constant="true"/>
        </listOfReactants>
        <listOfProducts>
          <speciesReference species="M_ppi_c" stoichiometry="1" constant="true"/>
          <speciesReference species="M_prbamp_c" stoichiometry="1" constant="true"/>
        </listOfProducts>
        <fbc:geneProductAssociation>
          <fbc:geneProductRef fbc:geneProduct="hisI_1"/>
        </fbc:geneProductAssociation>
      </reaction>
      <reaction metaid="R_R_hisA" id="R_R_hisA" name="hisA" reversible="false" fast="false" fbc:lowerFluxBound="FB3N0" fbc:upperFluxBound="FB4N1000">
        <notes>
          <body xmlns="http://www.w3.org/1999/xhtml">
            <p>SUBSYSTEM: Histidine Metabolism</p>
          </body>
        </notes>
        <listOfReactants>
          <speciesReference species="M_prfp_c" stoichiometry="1" constant="true"/>
        </listOfReactants>
        <listOfProducts>
          <speciesReference species="M_prlp_c" stoichiometry="1" constant="true"/>
        </listOfProducts>
        <fbc:geneProductAssociation>
          <fbc:geneProductRef fbc:geneProduct="hisA"/>
        </fbc:geneProductAssociation>
      </reaction>
      <reaction metaid="R_R_hisFH" id="R_R_hisFH" name="hisFH" reversible="true" fast="false" fbc:lowerFluxBound="FB1N1000" fbc:upperFluxBound="FB4N1000">
        <notes>
          <body xmlns="http://www.w3.org/1999/xhtml">
            <p>SUBSYSTEM: Histidine Metabolism</p>
          </body>
        </notes>
        <listOfReactants>
          <speciesReference species="M_nh3_c" stoichiometry="1" constant="true"/>
          <speciesReference species="M_prlp_c" stoichiometry="1" constant="true"/>
        </listOfReactants>
        <listOfProducts>
          <speciesReference species="M_aicar_c" stoichiometry="1" constant="true"/>
          <speciesReference species="M_eig3p_c" stoichiometry="1" constant="true"/>
        </listOfProducts>
        <fbc:geneProductAssociation>
          <fbc:geneProductRef fbc:geneProduct="hisFH"/>
        </fbc:geneProductAssociation>
      </reaction>
      <reaction metaid="R_R_hisB" id="R_R_hisB" name="hisB" reversible="false" fast="false" fbc:lowerFluxBound="FB3N0" fbc:upperFluxBound="FB4N1000">
        <notes>
          <body xmlns="http://www.w3.org/1999/xhtml">
            <p>SUBSYSTEM: Histidine Metabolism</p>
          </body>
        </notes>
        <listOfReactants>
          <speciesReference species="M_eig3p_c" stoichiometry="1" constant="true"/>
        </listOfReactants>
        <listOfProducts>
          <speciesReference species="M_h2o_c" stoichiometry="1" constant="true"/>
          <speciesReference species="M_imacp_c" stoichiometry="1" constant="true"/>
        </listOfProducts>
        <fbc:geneProductAssociation>
          <fbc:geneProductRef fbc:geneProduct="hisB_1"/>
        </fbc:geneProductAssociation>
      </reaction>
      <reaction metaid="R_R_hisC" id="R_R_hisC" name="hisC" reversible="false" fast="false" fbc:lowerFluxBound="FB3N0" fbc:upperFluxBound="FB4N1000">
        <notes>
          <body xmlns="http://www.w3.org/1999/xhtml">
            <p>SUBSYSTEM: Histidine Metabolism</p>
          </body>
        </notes>
        <listOfReactants>
          <speciesReference species="M_glu_L_c" stoichiometry="1" constant="true"/>
          <speciesReference species="M_imacp_c" stoichiometry="1" constant="true"/>
        </listOfReactants>
        <listOfProducts>
          <speciesReference species="M_akg_c" stoichiometry="1" constant="true"/>
          <speciesReference species="M_hisp_c" stoichiometry="1" constant="true"/>
        </listOfProducts>
        <fbc:geneProductAssociation>
          <fbc:geneProductRef fbc:geneProduct="hisC"/>
        </fbc:geneProductAssociation>
      </reaction>
      <reaction metaid="R_R_hisN" id="R_R_hisN" name="hisN" reversible="true" fast="false" fbc:lowerFluxBound="FB1N1000" fbc:upperFluxBound="FB4N1000">
        <notes>
          <body xmlns="http://www.w3.org/1999/xhtml">
            <p>SUBSYSTEM: Histidine Metabolism</p>
          </body>
        </notes>
        <listOfReactants>
          <speciesReference species="M_h2o_c" stoichiometry="1" constant="true"/>
          <speciesReference species="M_hisp_c" stoichiometry="1" constant="true"/>
        </listOfReactants>
        <listOfProducts>
          <speciesReference species="M_h_c" stoichiometry="3" constant="true"/>
          <speciesReference species="M_pi_c" stoichiometry="1" constant="true"/>
          <speciesReference species="M_histd_c" stoichiometry="1" constant="true"/>
        </listOfProducts>
        <fbc:geneProductAssociation>
          <fbc:geneProductRef fbc:geneProduct="hisB_2"/>
        </fbc:geneProductAssociation>
      </reaction>
      <reaction metaid="R_R_hisD" id="R_R_hisD" name="hisD" reversible="false" fast="false" fbc:lowerFluxBound="FB3N0" fbc:upperFluxBound="FB4N1000">
        <notes>
          <body xmlns="http://www.w3.org/1999/xhtml">
            <p>SUBSYSTEM: Histidine Metabolism</p>
          </body>
        </notes>
        <listOfReactants>
          <speciesReference species="M_h2o_c" stoichiometry="1" constant="true"/>
          <speciesReference species="M_nad_c" stoichiometry="2" constant="true"/>
          <speciesReference species="M_histd_c" stoichiometry="1" constant="true"/>
        </listOfReactants>
        <listOfProducts>
          <speciesReference species="M_h_c" stoichiometry="2" constant="true"/>
          <speciesReference species="M_nadh_c" stoichiometry="2" constant="true"/>
          <speciesReference species="M_his_L_c" stoichiometry="1" constant="true"/>
        </listOfProducts>
        <fbc:geneProductAssociation>
          <fbc:geneProductRef fbc:geneProduct="hisD"/>
        </fbc:geneProductAssociation>
      </reaction>
      <reaction metaid="R_R_r2_6_1_13" id="R_R_r2_6_1_13" name="r2.6.1.13" reversible="false" fast="false" fbc:lowerFluxBound="FB3N0" fbc:upperFluxBound="FB4N1000">
        <notes>
          <body xmlns="http://www.w3.org/1999/xhtml">
            <p>SUBSYSTEM: Arginine and Proline Metabolism</p>
          </body>
        </notes>
        <listOfReactants>
          <speciesReference species="M_akg_c" stoichiometry="1" constant="true"/>
          <speciesReference species="M_orn_c" stoichiometry="1" constant="true"/>
        </listOfReactants>
        <listOfProducts>
          <speciesReference species="M_glu_L_c" stoichiometry="1" constant="true"/>
          <speciesReference species="M_glu5sa_c" stoichiometry="1" constant="true"/>
        </listOfProducts>
        <fbc:geneProductAssociation>
          <fbc:geneProductRef fbc:geneProduct="r2__46__6__46__1__46__13"/>
        </fbc:geneProductAssociation>
      </reaction>
      <reaction metaid="R_R_manA" id="R_R_manA" name="manA" reversible="true" fast="false" fbc:lowerFluxBound="FB1N1000" fbc:upperFluxBound="FB4N1000">
        <notes>
          <body xmlns="http://www.w3.org/1999/xhtml">
            <p>SUBSYSTEM: Alternate Carbon Metabolism</p>
          </body>
        </notes>
        <listOfReactants>
          <speciesReference species="M_man6p_c" stoichiometry="1" constant="true"/>
        </listOfReactants>
        <listOfProducts>
          <speciesReference species="M_f6p_c" stoichiometry="1" constant="true"/>
        </listOfProducts>
        <fbc:geneProductAssociation>
          <fbc:geneProductRef fbc:geneProduct="manA"/>
        </fbc:geneProductAssociation>
      </reaction>
      <reaction metaid="R_R_pmmA" id="R_R_pmmA" name="pmmA" reversible="true" fast="false" fbc:lowerFluxBound="FB1N1000" fbc:upperFluxBound="FB4N1000">
        <notes>
          <body xmlns="http://www.w3.org/1999/xhtml">
            <p>SUBSYSTEM: Alternate Carbon Metabolism</p>
          </body>
        </notes>
        <listOfReactants>
          <speciesReference species="M_man1p_c" stoichiometry="1" constant="true"/>
        </listOfReactants>
        <listOfProducts>
          <speciesReference species="M_man6p_c" stoichiometry="1" constant="true"/>
        </listOfProducts>
        <fbc:geneProductAssociation>
          <fbc:geneProductRef fbc:geneProduct="pmmA"/>
        </fbc:geneProductAssociation>
      </reaction>
      <reaction metaid="R_R_rmlA2" id="R_R_rmlA2" name="rmlA2" reversible="false" fast="false" fbc:lowerFluxBound="FB3N0" fbc:upperFluxBound="FB4N1000">
        <notes>
          <body xmlns="http://www.w3.org/1999/xhtml">
            <p>SUBSYSTEM: Cell Envelope Biosynthesis</p>
          </body>
        </notes>
        <listOfReactants>
          <speciesReference species="M_gdp_c" stoichiometry="1" constant="true"/>
          <speciesReference species="M_man1p_c" stoichiometry="1" constant="true"/>
        </listOfReactants>
        <listOfProducts>
          <speciesReference species="M_h_c" stoichiometry="3" constant="true"/>
          <speciesReference species="M_pi_c" stoichiometry="1" constant="true"/>
          <speciesReference species="M_gdpman_c" stoichiometry="1" constant="true"/>
        </listOfProducts>
        <fbc:geneProductAssociation>
          <fbc:geneProductRef fbc:geneProduct="rmlA2"/>
        </fbc:geneProductAssociation>
      </reaction>
      <reaction metaid="R_R_glpK" id="R_R_glpK" name="glpK" reversible="false" fast="false" fbc:lowerFluxBound="FB3N0" fbc:upperFluxBound="FB4N1000">
        <notes>
          <body xmlns="http://www.w3.org/1999/xhtml">
            <p>SUBSYSTEM: Alternate Carbon Metabolism</p>
          </body>
        </notes>
        <listOfReactants>
          <speciesReference species="M_atp_c" stoichiometry="1" constant="true"/>
          <speciesReference species="M_glyc_c" stoichiometry="1" constant="true"/>
        </listOfReactants>
        <listOfProducts>
          <speciesReference species="M_adp_c" stoichiometry="1" constant="true"/>
          <speciesReference species="M_glyc3p_c" stoichiometry="1" constant="true"/>
        </listOfProducts>
        <fbc:geneProductAssociation>
          <fbc:geneProductRef fbc:geneProduct="glpK"/>
        </fbc:geneProductAssociation>
      </reaction>
      <reaction metaid="R_R_glmU" id="R_R_glmU" name="glmU" reversible="false" fast="false" fbc:lowerFluxBound="FB3N0" fbc:upperFluxBound="FB4N1000">
        <notes>
          <body xmlns="http://www.w3.org/1999/xhtml">
            <p>SUBSYSTEM: Cell Envelope Biosynthesis</p>
          </body>
        </notes>
        <listOfReactants>
          <speciesReference species="M_utp_c" stoichiometry="1" constant="true"/>
          <speciesReference species="M_acgam1p_c" stoichiometry="1" constant="true"/>
        </listOfReactants>
        <listOfProducts>
          <speciesReference species="M_ppi_c" stoichiometry="1" constant="true"/>
          <speciesReference species="M_uacgam_c" stoichiometry="1" constant="true"/>
        </listOfProducts>
        <fbc:geneProductAssociation>
          <fbc:geneProductRef fbc:geneProduct="glmU"/>
        </fbc:geneProductAssociation>
      </reaction>
      <reaction metaid="R_R_glmS" id="R_R_glmS" name="glmS" reversible="false" fast="false" fbc:lowerFluxBound="FB3N0" fbc:upperFluxBound="FB4N1000">
        <notes>
          <body xmlns="http://www.w3.org/1999/xhtml">
            <p>SUBSYSTEM: Cell Envelope Biosynthesis</p>
          </body>
        </notes>
        <listOfReactants>
          <speciesReference species="M_f6p_c" stoichiometry="1" constant="true"/>
          <speciesReference species="M_gln_L_c" stoichiometry="1" constant="true"/>
        </listOfReactants>
        <listOfProducts>
          <speciesReference species="M_glu_L_c" stoichiometry="1" constant="true"/>
          <speciesReference species="M_gam6p_c" stoichiometry="1" constant="true"/>
        </listOfProducts>
        <fbc:geneProductAssociation>
          <fbc:geneProductRef fbc:geneProduct="glmS"/>
        </fbc:geneProductAssociation>
      </reaction>
      <reaction metaid="R_R_pmmB_2" id="R_R_pmmB_2" name="pmmB_2" reversible="false" fast="false" fbc:lowerFluxBound="FB3N0" fbc:upperFluxBound="FB4N1000">
        <notes>
          <body xmlns="http://www.w3.org/1999/xhtml">
            <p>SUBSYSTEM: Cell Envelope Biosynthesis</p>
          </body>
        </notes>
        <listOfReactants>
          <speciesReference species="M_gam6p_c" stoichiometry="1" constant="true"/>
        </listOfReactants>
        <listOfProducts>
          <speciesReference species="M_gam1p_c" stoichiometry="1" constant="true"/>
        </listOfProducts>
        <fbc:geneProductAssociation>
          <fbc:geneProductRef fbc:geneProduct="pmmB_2"/>
        </fbc:geneProductAssociation>
      </reaction>
      <reaction metaid="R_R_r2_3_1_157" id="R_R_r2_3_1_157" name="r2.3.1.157" reversible="false" fast="false" fbc:lowerFluxBound="FB3N0" fbc:upperFluxBound="FB4N1000">
        <notes>
          <body xmlns="http://www.w3.org/1999/xhtml">
            <p>SUBSYSTEM: Cell Envelope Biosynthesis</p>
          </body>
        </notes>
        <listOfReactants>
          <speciesReference species="M_accoa_c" stoichiometry="1" constant="true"/>
          <speciesReference species="M_gam1p_c" stoichiometry="1" constant="true"/>
        </listOfReactants>
        <listOfProducts>
          <speciesReference species="M_coa_c" stoichiometry="1" constant="true"/>
          <speciesReference species="M_acgam1p_c" stoichiometry="1" constant="true"/>
        </listOfProducts>
        <fbc:geneProductAssociation>
          <fbc:geneProductRef fbc:geneProduct="r2__46__3__46__1__46__157"/>
        </fbc:geneProductAssociation>
      </reaction>
      <reaction metaid="R_R_galU1" id="R_R_galU1" name="galU1" reversible="true" fast="false" fbc:lowerFluxBound="FB1N1000" fbc:upperFluxBound="FB4N1000">
        <notes>
          <body xmlns="http://www.w3.org/1999/xhtml">
            <p>SUBSYSTEM: Cell Envelope Biosynthesis</p>
          </body>
        </notes>
        <listOfReactants>
          <speciesReference species="M_utp_c" stoichiometry="1" constant="true"/>
          <speciesReference species="M_g1p_c" stoichiometry="1" constant="true"/>
        </listOfReactants>
        <listOfProducts>
          <speciesReference species="M_ppi_c" stoichiometry="1" constant="true"/>
          <speciesReference species="M_udpg_c" stoichiometry="1" constant="true"/>
        </listOfProducts>
        <fbc:geneProductAssociation>
          <fbc:geneProductRef fbc:geneProduct="galU1"/>
        </fbc:geneProductAssociation>
      </reaction>
      <reaction metaid="R_R_dppt" id="R_R_dppt" name="dppt" reversible="true" fast="false" fbc:lowerFluxBound="FB1N1000" fbc:upperFluxBound="FB4N1000">
        <notes>
          <body xmlns="http://www.w3.org/1999/xhtml">
            <p>SUBSYSTEM: Anaplerotic reactions</p>
          </body>
        </notes>
        <listOfReactants>
          <speciesReference species="M_h2o_c" stoichiometry="1" constant="true"/>
          <speciesReference species="M_ppi_c" stoichiometry="1" constant="true"/>
        </listOfReactants>
        <listOfProducts>
          <speciesReference species="M_h_c" stoichiometry="6" constant="true"/>
          <speciesReference species="M_pi_c" stoichiometry="2" constant="true"/>
        </listOfProducts>
        <fbc:geneProductAssociation>
          <fbc:geneProductRef fbc:geneProduct="Pyrophosphate"/>
        </fbc:geneProductAssociation>
      </reaction>
      <reaction metaid="R_R_ddl" id="R_R_ddl" name="ddl" reversible="true" fast="false" fbc:lowerFluxBound="FB1N1000" fbc:upperFluxBound="FB4N1000">
        <notes>
          <body xmlns="http://www.w3.org/1999/xhtml">
            <p>SUBSYSTEM: Membrane Lipid Metabolism</p>
          </body>
        </notes>
        <listOfReactants>
          <speciesReference species="M_atp_c" stoichiometry="1" constant="true"/>
          <speciesReference species="M_ala_D_c" stoichiometry="2" constant="true"/>
        </listOfReactants>
        <listOfProducts>
          <speciesReference species="M_h_c" stoichiometry="3" constant="true"/>
          <speciesReference species="M_adp_c" stoichiometry="1" constant="true"/>
          <speciesReference species="M_pi_c" stoichiometry="1" constant="true"/>
          <speciesReference species="M_ALAALA_c" stoichiometry="1" constant="true"/>
        </listOfProducts>
        <fbc:geneProductAssociation>
          <fbc:geneProductRef fbc:geneProduct="ddl"/>
        </fbc:geneProductAssociation>
      </reaction>
      <reaction metaid="R_R_murI" id="R_R_murI" name="murI" reversible="true" fast="false" fbc:lowerFluxBound="FB1N1000" fbc:upperFluxBound="FB4N1000">
        <notes>
          <body xmlns="http://www.w3.org/1999/xhtml">
            <p>SUBSYSTEM: Membrane Lipid Metabolism</p>
          </body>
        </notes>
        <listOfReactants>
          <speciesReference species="M_glu_D_c" stoichiometry="1" constant="true"/>
        </listOfReactants>
        <listOfProducts>
          <speciesReference species="M_glu_L_c" stoichiometry="1" constant="true"/>
        </listOfProducts>
        <fbc:geneProductAssociation>
          <fbc:geneProductRef fbc:geneProduct="murI"/>
        </fbc:geneProductAssociation>
      </reaction>
      <reaction metaid="R_R_murB" id="R_R_murB" name="murB" reversible="false" fast="false" fbc:lowerFluxBound="FB3N0" fbc:upperFluxBound="FB4N1000">
        <notes>
          <body xmlns="http://www.w3.org/1999/xhtml">
            <p>SUBSYSTEM: Cell Envelope Biosynthesis</p>
          </body>
        </notes>
        <listOfReactants>
          <speciesReference species="M_h_c" stoichiometry="1" constant="true"/>
          <speciesReference species="M_nadph_c" stoichiometry="1" constant="true"/>
          <speciesReference species="M_uaccg_c" stoichiometry="1" constant="true"/>
        </listOfReactants>
        <listOfProducts>
          <speciesReference species="M_nadp_c" stoichiometry="1" constant="true"/>
          <speciesReference species="M_uamr_c" stoichiometry="1" constant="true"/>
        </listOfProducts>
        <fbc:geneProductAssociation>
          <fbc:geneProductRef fbc:geneProduct="murB"/>
        </fbc:geneProductAssociation>
      </reaction>
      <reaction metaid="R_R_murA" id="R_R_murA" name="murA" reversible="false" fast="false" fbc:lowerFluxBound="FB3N0" fbc:upperFluxBound="FB4N1000">
        <notes>
          <body xmlns="http://www.w3.org/1999/xhtml">
            <p>SUBSYSTEM: Cell Envelope Biosynthesis</p>
          </body>
        </notes>
        <listOfReactants>
          <speciesReference species="M_pep_c" stoichiometry="1" constant="true"/>
          <speciesReference species="M_uacgam_c" stoichiometry="1" constant="true"/>
        </listOfReactants>
        <listOfProducts>
          <speciesReference species="M_h_c" stoichiometry="3" constant="true"/>
          <speciesReference species="M_pi_c" stoichiometry="1" constant="true"/>
          <speciesReference species="M_uaccg_c" stoichiometry="1" constant="true"/>
        </listOfProducts>
        <fbc:geneProductAssociation>
          <fbc:geneProductRef fbc:geneProduct="murA"/>
        </fbc:geneProductAssociation>
      </reaction>
      <reaction metaid="R_R_mt" id="R_R_mt" name="mt" reversible="false" fast="false" fbc:lowerFluxBound="FB3N0" fbc:upperFluxBound="FB4N1000">
        <notes>
          <body xmlns="http://www.w3.org/1999/xhtml">
            <p>SUBSYSTEM: Unassigned</p>
          </body>
        </notes>
        <listOfReactants>
          <speciesReference species="M_atp_c" stoichiometry="1" constant="true"/>
          <speciesReference species="M_h2o_c" stoichiometry="1" constant="true"/>
        </listOfReactants>
        <listOfProducts>
          <speciesReference species="M_h_c" stoichiometry="3" constant="true"/>
          <speciesReference species="M_adp_c" stoichiometry="1" constant="true"/>
          <speciesReference species="M_pi_c" stoichiometry="1" constant="true"/>
        </listOfProducts>
        <fbc:geneProductAssociation>
          <fbc:geneProductRef fbc:geneProduct="maintenance"/>
        </fbc:geneProductAssociation>
      </reaction>
      <reaction metaid="R_R_coaA" id="R_R_coaA" name="coaA" reversible="false" fast="false" fbc:lowerFluxBound="FB3N0" fbc:upperFluxBound="FB4N1000">
        <notes>
          <body xmlns="http://www.w3.org/1999/xhtml">
            <p>SUBSYSTEM: Cofactor and Prosthetic Group Biosynthesis</p>
          </body>
        </notes>
        <listOfReactants>
          <speciesReference species="M_atp_c" stoichiometry="1" constant="true"/>
          <speciesReference species="M_pnto_R_c" stoichiometry="1" constant="true"/>
        </listOfReactants>
        <listOfProducts>
          <speciesReference species="M_adp_c" stoichiometry="1" constant="true"/>
          <speciesReference species="M_4ppan_c" stoichiometry="1" constant="true"/>
        </listOfProducts>
        <fbc:geneProductAssociation>
          <fbc:geneProductRef fbc:geneProduct="coaA"/>
        </fbc:geneProductAssociation>
      </reaction>
      <reaction metaid="R_R_PPNCL2" id="R_R_PPNCL2" name="PPNCL2" reversible="true" fast="false" fbc:lowerFluxBound="FB1N1000" fbc:upperFluxBound="FB4N1000">
        <notes>
          <body xmlns="http://www.w3.org/1999/xhtml">
            <p>SUBSYSTEM: Cofactor and Prosthetic Group Biosynthesis</p>
          </body>
        </notes>
        <listOfReactants>
          <speciesReference species="M_ctp_c" stoichiometry="1" constant="true"/>
          <speciesReference species="M_cys_L_c" stoichiometry="1" constant="true"/>
          <speciesReference species="M_4ppan_c" stoichiometry="1" constant="true"/>
        </listOfReactants>
        <listOfProducts>
          <speciesReference species="M_cmp_c" stoichiometry="1" constant="true"/>
          <speciesReference species="M_ppi_c" stoichiometry="1" constant="true"/>
          <speciesReference species="M_4ppcys_c" stoichiometry="1" constant="true"/>
        </listOfProducts>
        <fbc:geneProductAssociation>
          <fbc:geneProductRef fbc:geneProduct="PPNCL2"/>
        </fbc:geneProductAssociation>
      </reaction>
      <reaction metaid="R_R_PPCDC" id="R_R_PPCDC" name="PPCDC" reversible="true" fast="false" fbc:lowerFluxBound="FB1N1000" fbc:upperFluxBound="FB4N1000">
        <notes>
          <body xmlns="http://www.w3.org/1999/xhtml">
            <p>SUBSYSTEM: Cofactor and Prosthetic Group Biosynthesis</p>
          </body>
        </notes>
        <listOfReactants>
          <speciesReference species="M_4ppcys_c" stoichiometry="1" constant="true"/>
        </listOfReactants>
        <listOfProducts>
          <speciesReference species="M_co2_c" stoichiometry="1" constant="true"/>
          <speciesReference species="M_pan4p_c" stoichiometry="1" constant="true"/>
        </listOfProducts>
        <fbc:geneProductAssociation>
          <fbc:geneProductRef fbc:geneProduct="PPCDC"/>
        </fbc:geneProductAssociation>
      </reaction>
      <reaction metaid="R_R_coaE" id="R_R_coaE" name="coaE" reversible="false" fast="false" fbc:lowerFluxBound="FB3N0" fbc:upperFluxBound="FB4N1000">
        <notes>
          <body xmlns="http://www.w3.org/1999/xhtml">
            <p>SUBSYSTEM: Cofactor and Prosthetic Group Biosynthesis</p>
          </body>
        </notes>
        <listOfReactants>
          <speciesReference species="M_atp_c" stoichiometry="1" constant="true"/>
          <speciesReference species="M_dpcoa_c" stoichiometry="1" constant="true"/>
        </listOfReactants>
        <listOfProducts>
          <speciesReference species="M_adp_c" stoichiometry="1" constant="true"/>
          <speciesReference species="M_coa_c" stoichiometry="1" constant="true"/>
        </listOfProducts>
        <fbc:geneProductAssociation>
          <fbc:geneProductRef fbc:geneProduct="coaE"/>
        </fbc:geneProductAssociation>
      </reaction>
      <reaction metaid="R_R_coaD" id="R_R_coaD" name="coaD" reversible="false" fast="false" fbc:lowerFluxBound="FB3N0" fbc:upperFluxBound="FB4N1000">
        <notes>
          <body xmlns="http://www.w3.org/1999/xhtml">
            <p>SUBSYSTEM: Cofactor and Prosthetic Group Biosynthesis</p>
          </body>
        </notes>
        <listOfReactants>
          <speciesReference species="M_atp_c" stoichiometry="1" constant="true"/>
          <speciesReference species="M_pan4p_c" stoichiometry="1" constant="true"/>
        </listOfReactants>
        <listOfProducts>
          <speciesReference species="M_ppi_c" stoichiometry="1" constant="true"/>
          <speciesReference species="M_dpcoa_c" stoichiometry="1" constant="true"/>
        </listOfProducts>
        <fbc:geneProductAssociation>
          <fbc:geneProductRef fbc:geneProduct="coaD"/>
        </fbc:geneProductAssociation>
      </reaction>
      <reaction metaid="R_R_MTHFR2" id="R_R_MTHFR2" name="MTHFR2" reversible="false" fast="false" fbc:lowerFluxBound="FB3N0" fbc:upperFluxBound="FB4N1000">
        <notes>
          <body xmlns="http://www.w3.org/1999/xhtml">
            <p>SUBSYSTEM: Folate Metabolism</p>
          </body>
        </notes>
        <listOfReactants>
          <speciesReference species="M_h_c" stoichiometry="1" constant="true"/>
          <speciesReference species="M_nadh_c" stoichiometry="1" constant="true"/>
          <speciesReference species="M_mlthf_c" stoichiometry="1" constant="true"/>
        </listOfReactants>
        <listOfProducts>
          <speciesReference species="M_nad_c" stoichiometry="1" constant="true"/>
          <speciesReference species="M_5mthf_c" stoichiometry="1" constant="true"/>
        </listOfProducts>
        <fbc:geneProductAssociation>
          <fbc:geneProductRef fbc:geneProduct="MTHFR2"/>
        </fbc:geneProductAssociation>
      </reaction>
      <reaction metaid="R_R_folD2" id="R_R_folD2" name="folD2" reversible="true" fast="false" fbc:lowerFluxBound="FB1N1000" fbc:upperFluxBound="FB4N1000">
        <notes>
          <body xmlns="http://www.w3.org/1999/xhtml">
            <p>SUBSYSTEM: Folate Metabolism</p>
          </body>
        </notes>
        <listOfReactants>
          <speciesReference species="M_nadp_c" stoichiometry="1" constant="true"/>
          <speciesReference species="M_mlthf_c" stoichiometry="1" constant="true"/>
        </listOfReactants>
        <listOfProducts>
          <speciesReference species="M_nadph_c" stoichiometry="1" constant="true"/>
          <speciesReference species="M_methf_c" stoichiometry="1" constant="true"/>
        </listOfProducts>
        <fbc:geneProductAssociation>
          <fbc:geneProductRef fbc:geneProduct="folD2"/>
        </fbc:geneProductAssociation>
      </reaction>
      <reaction metaid="R_R_FTHFD" id="R_R_FTHFD" name="FTHFD" reversible="false" fast="false" fbc:lowerFluxBound="FB3N0" fbc:upperFluxBound="FB4N1000">
        <notes>
          <body xmlns="http://www.w3.org/1999/xhtml">
            <p>SUBSYSTEM: Folate Metabolism</p>
          </body>
        </notes>
        <listOfReactants>
          <speciesReference species="M_h2o_c" stoichiometry="1" constant="true"/>
          <speciesReference species="M_10fthf_c" stoichiometry="1" constant="true"/>
        </listOfReactants>
        <listOfProducts>
          <speciesReference species="M_for_c" stoichiometry="1" constant="true"/>
          <speciesReference species="M_thf_c" stoichiometry="1" constant="true"/>
        </listOfProducts>
        <fbc:geneProductAssociation>
          <fbc:geneProductRef fbc:geneProduct="FTHFD"/>
        </fbc:geneProductAssociation>
      </reaction>
      <reaction metaid="R_R_nadE" id="R_R_nadE" name="nadE" reversible="false" fast="false" fbc:lowerFluxBound="FB3N0" fbc:upperFluxBound="FB4N1000">
        <notes>
          <body xmlns="http://www.w3.org/1999/xhtml">
            <p>SUBSYSTEM: Cofactor and Prosthetic Group Biosynthesis</p>
          </body>
        </notes>
        <listOfReactants>
          <speciesReference species="M_atp_c" stoichiometry="1" constant="true"/>
          <speciesReference species="M_nh3_c" stoichiometry="1" constant="true"/>
          <speciesReference species="M_dnad_c" stoichiometry="1" constant="true"/>
        </listOfReactants>
        <listOfProducts>
          <speciesReference species="M_nad_c" stoichiometry="1" constant="true"/>
          <speciesReference species="M_amp_c" stoichiometry="1" constant="true"/>
          <speciesReference species="M_ppi_c" stoichiometry="1" constant="true"/>
        </listOfProducts>
        <fbc:geneProductAssociation>
          <fbc:geneProductRef fbc:geneProduct="nadE"/>
        </fbc:geneProductAssociation>
      </reaction>
      <reaction metaid="R_R_r6_3_5_1" id="R_R_r6_3_5_1" name="r6.3.5.1" reversible="false" fast="false" fbc:lowerFluxBound="FB3N0" fbc:upperFluxBound="FB4N1000">
        <notes>
          <body xmlns="http://www.w3.org/1999/xhtml">
            <p>SUBSYSTEM: Cofactor and Prosthetic Group Biosynthesis</p>
          </body>
        </notes>
        <listOfReactants>
          <speciesReference species="M_atp_c" stoichiometry="1" constant="true"/>
          <speciesReference species="M_h2o_c" stoichiometry="1" constant="true"/>
          <speciesReference species="M_gln_L_c" stoichiometry="1" constant="true"/>
          <speciesReference species="M_dnad_c" stoichiometry="1" constant="true"/>
        </listOfReactants>
        <listOfProducts>
          <speciesReference species="M_nad_c" stoichiometry="1" constant="true"/>
          <speciesReference species="M_amp_c" stoichiometry="1" constant="true"/>
          <speciesReference species="M_glu_L_c" stoichiometry="1" constant="true"/>
          <speciesReference species="M_ppi_c" stoichiometry="1" constant="true"/>
        </listOfProducts>
        <fbc:geneProductAssociation>
          <fbc:geneProductRef fbc:geneProduct="r6__46__3__46__5__46__1"/>
        </fbc:geneProductAssociation>
      </reaction>
      <reaction metaid="R_R_r2_7_7_18" id="R_R_r2_7_7_18" name="r2.7.7.18" reversible="false" fast="false" fbc:lowerFluxBound="FB3N0" fbc:upperFluxBound="FB4N1000">
        <notes>
          <body xmlns="http://www.w3.org/1999/xhtml">
            <p>SUBSYSTEM: Cofactor and Prosthetic Group Biosynthesis</p>
          </body>
        </notes>
        <listOfReactants>
          <speciesReference species="M_atp_c" stoichiometry="1" constant="true"/>
          <speciesReference species="M_nicrnt_c" stoichiometry="1" constant="true"/>
        </listOfReactants>
        <listOfProducts>
          <speciesReference species="M_ppi_c" stoichiometry="1" constant="true"/>
          <speciesReference species="M_dnad_c" stoichiometry="1" constant="true"/>
        </listOfProducts>
        <fbc:geneProductAssociation>
          <fbc:geneProductRef fbc:geneProduct="r2__46__7__46__7__46__18"/>
        </fbc:geneProductAssociation>
      </reaction>
      <reaction metaid="R_R_r3_5_1_19" id="R_R_r3_5_1_19" name="r3.5.1.19" reversible="true" fast="false" fbc:lowerFluxBound="FB1N1000" fbc:upperFluxBound="FB4N1000">
        <notes>
          <body xmlns="http://www.w3.org/1999/xhtml">
            <p>SUBSYSTEM: Cofactor and Prosthetic Group Biosynthesis</p>
          </body>
        </notes>
        <listOfReactants>
          <speciesReference species="M_h2o_c" stoichiometry="1" constant="true"/>
          <speciesReference species="M_ncam_c" stoichiometry="1" constant="true"/>
        </listOfReactants>
        <listOfProducts>
          <speciesReference species="M_h_c" stoichiometry="1" constant="true"/>
          <speciesReference species="M_nh3_c" stoichiometry="1" constant="true"/>
          <speciesReference species="M_nac_c" stoichiometry="1" constant="true"/>
        </listOfProducts>
        <fbc:geneProductAssociation>
          <fbc:geneProductRef fbc:geneProduct="r3__46__5__46__1__46__19"/>
        </fbc:geneProductAssociation>
      </reaction>
      <reaction metaid="R_R_r2_4_2_11" id="R_R_r2_4_2_11" name="r2.4.2.11" reversible="false" fast="false" fbc:lowerFluxBound="FB3N0" fbc:upperFluxBound="FB4N1000">
        <notes>
          <body xmlns="http://www.w3.org/1999/xhtml">
            <p>SUBSYSTEM: Cofactor and Prosthetic Group Biosynthesis</p>
          </body>
        </notes>
        <listOfReactants>
          <speciesReference species="M_atp_c" stoichiometry="1" constant="true"/>
          <speciesReference species="M_h2o_c" stoichiometry="1" constant="true"/>
          <speciesReference species="M_prpp_c" stoichiometry="1" constant="true"/>
          <speciesReference species="M_nac_c" stoichiometry="1" constant="true"/>
        </listOfReactants>
        <listOfProducts>
          <speciesReference species="M_h_c" stoichiometry="1" constant="true"/>
          <speciesReference species="M_adp_c" stoichiometry="1" constant="true"/>
          <speciesReference species="M_pi_c" stoichiometry="1" constant="true"/>
          <speciesReference species="M_ppi_c" stoichiometry="1" constant="true"/>
          <speciesReference species="M_nicrnt_c" stoichiometry="1" constant="true"/>
        </listOfProducts>
        <fbc:geneProductAssociation>
          <fbc:geneProductRef fbc:geneProduct="r2__46__4__46__2__46__11"/>
        </fbc:geneProductAssociation>
      </reaction>
      <reaction metaid="R_R_panB" id="R_R_panB" name="panB" reversible="false" fast="false" fbc:lowerFluxBound="FB3N0" fbc:upperFluxBound="FB4N1000">
        <notes>
          <body xmlns="http://www.w3.org/1999/xhtml">
            <p>SUBSYSTEM: Cofactor and Prosthetic Group Biosynthesis</p>
          </body>
        </notes>
        <listOfReactants>
          <speciesReference species="M_h2o_c" stoichiometry="1" constant="true"/>
          <speciesReference species="M_mlthf_c" stoichiometry="1" constant="true"/>
          <speciesReference species="M_3mob_c" stoichiometry="1" constant="true"/>
        </listOfReactants>
        <listOfProducts>
          <speciesReference species="M_thf_c" stoichiometry="1" constant="true"/>
          <speciesReference species="M_2dhp_c" stoichiometry="1" constant="true"/>
        </listOfProducts>
        <fbc:geneProductAssociation>
          <fbc:geneProductRef fbc:geneProduct="panB"/>
        </fbc:geneProductAssociation>
      </reaction>
      <reaction metaid="R_R_panE" id="R_R_panE" name="panE" reversible="false" fast="false" fbc:lowerFluxBound="FB3N0" fbc:upperFluxBound="FB4N1000">
        <notes>
          <body xmlns="http://www.w3.org/1999/xhtml">
            <p>SUBSYSTEM: Cofactor and Prosthetic Group Biosynthesis</p>
          </body>
        </notes>
        <listOfReactants>
          <speciesReference species="M_h_c" stoichiometry="1" constant="true"/>
          <speciesReference species="M_nadph_c" stoichiometry="1" constant="true"/>
          <speciesReference species="M_2dhp_c" stoichiometry="1" constant="true"/>
        </listOfReactants>
        <listOfProducts>
          <speciesReference species="M_nadp_c" stoichiometry="1" constant="true"/>
          <speciesReference species="M_pant_R_c" stoichiometry="1" constant="true"/>
        </listOfProducts>
        <fbc:geneProductAssociation>
          <fbc:geneProductRef fbc:geneProduct="panE"/>
        </fbc:geneProductAssociation>
      </reaction>
      <reaction metaid="R_R_panD" id="R_R_panD" name="panD" reversible="false" fast="false" fbc:lowerFluxBound="FB3N0" fbc:upperFluxBound="FB4N1000">
        <notes>
          <body xmlns="http://www.w3.org/1999/xhtml">
            <p>SUBSYSTEM: Cofactor and Prosthetic Group Biosynthesis</p>
          </body>
        </notes>
        <listOfReactants>
          <speciesReference species="M_asp_L_c" stoichiometry="1" constant="true"/>
        </listOfReactants>
        <listOfProducts>
          <speciesReference species="M_co2_c" stoichiometry="1" constant="true"/>
          <speciesReference species="M_ala_B_c" stoichiometry="1" constant="true"/>
        </listOfProducts>
        <fbc:geneProductAssociation>
          <fbc:geneProductRef fbc:geneProduct="panD"/>
        </fbc:geneProductAssociation>
      </reaction>
      <reaction metaid="R_R_panC" id="R_R_panC" name="panC" reversible="false" fast="false" fbc:lowerFluxBound="FB3N0" fbc:upperFluxBound="FB4N1000">
        <notes>
          <body xmlns="http://www.w3.org/1999/xhtml">
            <p>SUBSYSTEM: Cofactor and Prosthetic Group Biosynthesis</p>
          </body>
        </notes>
        <listOfReactants>
          <speciesReference species="M_atp_c" stoichiometry="1" constant="true"/>
          <speciesReference species="M_pant_R_c" stoichiometry="1" constant="true"/>
          <speciesReference species="M_ala_B_c" stoichiometry="1" constant="true"/>
        </listOfReactants>
        <listOfProducts>
          <speciesReference species="M_amp_c" stoichiometry="1" constant="true"/>
          <speciesReference species="M_ppi_c" stoichiometry="1" constant="true"/>
          <speciesReference species="M_pnto_R_c" stoichiometry="1" constant="true"/>
        </listOfProducts>
        <fbc:geneProductAssociation>
          <fbc:geneProductRef fbc:geneProduct="panC"/>
        </fbc:geneProductAssociation>
      </reaction>
      <reaction metaid="R_R_ribA" id="R_R_ribA" name="ribA" reversible="false" fast="false" fbc:lowerFluxBound="FB3N0" fbc:upperFluxBound="FB4N1000">
        <notes>
          <body xmlns="http://www.w3.org/1999/xhtml">
            <p>SUBSYSTEM: Cofactor and Prosthetic Group Biosynthesis</p>
          </body>
        </notes>
        <listOfReactants>
          <speciesReference species="M_h2o_c" stoichiometry="3" constant="true"/>
          <speciesReference species="M_gtp_c" stoichiometry="1" constant="true"/>
        </listOfReactants>
        <listOfProducts>
          <speciesReference species="M_for_c" stoichiometry="1" constant="true"/>
          <speciesReference species="M_ppi_c" stoichiometry="1" constant="true"/>
          <speciesReference species="M_25drapp_c" stoichiometry="1" constant="true"/>
        </listOfProducts>
        <fbc:geneProductAssociation>
          <fbc:geneProductRef fbc:geneProduct="ribA"/>
        </fbc:geneProductAssociation>
      </reaction>
      <reaction metaid="R_R_ribG" id="R_R_ribG" name="ribG" reversible="true" fast="false" fbc:lowerFluxBound="FB1N1000" fbc:upperFluxBound="FB4N1000">
        <notes>
          <body xmlns="http://www.w3.org/1999/xhtml">
            <p>SUBSYSTEM: Cofactor and Prosthetic Group Biosynthesis</p>
          </body>
        </notes>
        <listOfReactants>
          <speciesReference species="M_h2o_c" stoichiometry="1" constant="true"/>
          <speciesReference species="M_25drapp_c" stoichiometry="1" constant="true"/>
        </listOfReactants>
        <listOfProducts>
          <speciesReference species="M_nh3_c" stoichiometry="1" constant="true"/>
          <speciesReference species="M_5apru_c" stoichiometry="1" constant="true"/>
        </listOfProducts>
        <fbc:geneProductAssociation>
          <fbc:geneProductRef fbc:geneProduct="ribG"/>
        </fbc:geneProductAssociation>
      </reaction>
      <reaction metaid="R_R_NCgl1535" id="R_R_NCgl1535" name="NCgl1535" reversible="false" fast="false" fbc:lowerFluxBound="FB3N0" fbc:upperFluxBound="FB4N1000">
        <notes>
          <body xmlns="http://www.w3.org/1999/xhtml">
            <p>SUBSYSTEM: Cofactor and Prosthetic Group Biosynthesis</p>
          </body>
        </notes>
        <listOfReactants>
          <speciesReference species="M_h_c" stoichiometry="1" constant="true"/>
          <speciesReference species="M_nadph_c" stoichiometry="1" constant="true"/>
          <speciesReference species="M_5apru_c" stoichiometry="1" constant="true"/>
        </listOfReactants>
        <listOfProducts>
          <speciesReference species="M_nadp_c" stoichiometry="1" constant="true"/>
          <speciesReference species="M_5aprbu_c" stoichiometry="1" constant="true"/>
        </listOfProducts>
        <fbc:geneProductAssociation>
          <fbc:geneProductRef fbc:geneProduct="NCgl1535"/>
        </fbc:geneProductAssociation>
      </reaction>
      <reaction metaid="R_R_rib_1" id="R_R_rib_1" name="rib_1" reversible="true" fast="false" fbc:lowerFluxBound="FB1N1000" fbc:upperFluxBound="FB4N1000">
        <notes>
          <body xmlns="http://www.w3.org/1999/xhtml">
            <p>SUBSYSTEM: Cofactor and Prosthetic Group Biosynthesis</p>
          </body>
        </notes>
        <listOfReactants>
          <speciesReference species="M_ru5p_D_c" stoichiometry="1" constant="true"/>
        </listOfReactants>
        <listOfProducts>
          <speciesReference species="M_for_c" stoichiometry="1" constant="true"/>
          <speciesReference species="M_db4p_c" stoichiometry="1" constant="true"/>
        </listOfProducts>
        <fbc:geneProductAssociation>
          <fbc:geneProductRef fbc:geneProduct="rib_1"/>
        </fbc:geneProductAssociation>
      </reaction>
      <reaction metaid="R_R_ribH" id="R_R_ribH" name="ribH" reversible="true" fast="false" fbc:lowerFluxBound="FB1N1000" fbc:upperFluxBound="FB4N1000">
        <notes>
          <body xmlns="http://www.w3.org/1999/xhtml">
            <p>SUBSYSTEM: Cofactor and Prosthetic Group Biosynthesis</p>
          </body>
        </notes>
        <listOfReactants>
          <speciesReference species="M_h2o_c" stoichiometry="1" constant="true"/>
          <speciesReference species="M_5aprbu_c" stoichiometry="1" constant="true"/>
        </listOfReactants>
        <listOfProducts>
          <speciesReference species="M_h_c" stoichiometry="3" constant="true"/>
          <speciesReference species="M_pi_c" stoichiometry="1" constant="true"/>
          <speciesReference species="M_4r5au_c" stoichiometry="1" constant="true"/>
        </listOfProducts>
        <fbc:geneProductAssociation>
          <fbc:geneProductRef fbc:geneProduct="ribH"/>
        </fbc:geneProductAssociation>
      </reaction>
      <reaction metaid="R_R_rib_2" id="R_R_rib_2" name="rib_2" reversible="true" fast="false" fbc:lowerFluxBound="FB1N1000" fbc:upperFluxBound="FB4N1000">
        <notes>
          <body xmlns="http://www.w3.org/1999/xhtml">
            <p>SUBSYSTEM: Cofactor and Prosthetic Group Biosynthesis</p>
          </body>
        </notes>
        <listOfReactants>
          <speciesReference species="M_db4p_c" stoichiometry="1" constant="true"/>
          <speciesReference species="M_4r5au_c" stoichiometry="1" constant="true"/>
        </listOfReactants>
        <listOfProducts>
          <speciesReference species="M_h_c" stoichiometry="7" constant="true"/>
          <speciesReference species="M_pi_c" stoichiometry="1" constant="true"/>
          <speciesReference species="M_o2_c" stoichiometry="1" constant="true"/>
          <speciesReference species="M_dmlz_c" stoichiometry="1" constant="true"/>
        </listOfProducts>
        <fbc:geneProductAssociation>
          <fbc:geneProductRef fbc:geneProduct="rib_2"/>
        </fbc:geneProductAssociation>
      </reaction>
      <reaction metaid="R_R_rib_3" id="R_R_rib_3" name="rib_3" reversible="false" fast="false" fbc:lowerFluxBound="FB3N0" fbc:upperFluxBound="FB4N1000">
        <notes>
          <body xmlns="http://www.w3.org/1999/xhtml">
            <p>SUBSYSTEM: Cofactor and Prosthetic Group Biosynthesis</p>
          </body>
        </notes>
        <listOfReactants>
          <speciesReference species="M_dmlz_c" stoichiometry="2" constant="true"/>
        </listOfReactants>
        <listOfProducts>
          <speciesReference species="M_4r5au_c" stoichiometry="1" constant="true"/>
          <speciesReference species="M_ribflv_c" stoichiometry="1" constant="true"/>
        </listOfProducts>
        <fbc:geneProductAssociation>
          <fbc:geneProductRef fbc:geneProduct="rib_3"/>
        </fbc:geneProductAssociation>
      </reaction>
      <reaction metaid="R_R_rib_4" id="R_R_rib_4" name="rib_4" reversible="true" fast="false" fbc:lowerFluxBound="FB1N1000" fbc:upperFluxBound="FB4N1000">
        <notes>
          <body xmlns="http://www.w3.org/1999/xhtml">
            <p>SUBSYSTEM: Cofactor and Prosthetic Group Biosynthesis</p>
          </body>
        </notes>
        <listOfReactants>
          <speciesReference species="M_atp_c" stoichiometry="1" constant="true"/>
          <speciesReference species="M_fmn_c" stoichiometry="1" constant="true"/>
        </listOfReactants>
        <listOfProducts>
          <speciesReference species="M_ppi_c" stoichiometry="1" constant="true"/>
          <speciesReference species="M_fad_c" stoichiometry="1" constant="true"/>
        </listOfProducts>
        <fbc:geneProductAssociation>
          <fbc:geneProductRef fbc:geneProduct="rib_4"/>
        </fbc:geneProductAssociation>
      </reaction>
      <reaction metaid="R_R_ribF" id="R_R_ribF" name="ribF" reversible="false" fast="false" fbc:lowerFluxBound="FB3N0" fbc:upperFluxBound="FB4N1000">
        <notes>
          <body xmlns="http://www.w3.org/1999/xhtml">
            <p>SUBSYSTEM: Cofactor and Prosthetic Group Biosynthesis</p>
          </body>
        </notes>
        <listOfReactants>
          <speciesReference species="M_atp_c" stoichiometry="1" constant="true"/>
          <speciesReference species="M_ribflv_c" stoichiometry="1" constant="true"/>
        </listOfReactants>
        <listOfProducts>
          <speciesReference species="M_adp_c" stoichiometry="1" constant="true"/>
          <speciesReference species="M_fmn_c" stoichiometry="1" constant="true"/>
        </listOfProducts>
        <fbc:geneProductAssociation>
          <fbc:geneProductRef fbc:geneProduct="ribF"/>
        </fbc:geneProductAssociation>
      </reaction>
      <reaction metaid="R_R_folE" id="R_R_folE" name="folE" reversible="false" fast="false" fbc:lowerFluxBound="FB3N0" fbc:upperFluxBound="FB4N1000">
        <notes>
          <body xmlns="http://www.w3.org/1999/xhtml">
            <p>SUBSYSTEM: Cofactor and Prosthetic Group Biosynthesis</p>
          </body>
        </notes>
        <listOfReactants>
          <speciesReference species="M_h2o_c" stoichiometry="1" constant="true"/>
          <speciesReference species="M_gtp_c" stoichiometry="1" constant="true"/>
        </listOfReactants>
        <listOfProducts>
          <speciesReference species="M_for_c" stoichiometry="1" constant="true"/>
          <speciesReference species="M_ahdt_c" stoichiometry="1" constant="true"/>
        </listOfProducts>
        <fbc:geneProductAssociation>
          <fbc:geneProductRef fbc:geneProduct="folE"/>
        </fbc:geneProductAssociation>
      </reaction>
      <reaction metaid="R_R_phoB" id="R_R_phoB" name="phoB" reversible="true" fast="false" fbc:lowerFluxBound="FB1N1000" fbc:upperFluxBound="FB4N1000">
        <notes>
          <body xmlns="http://www.w3.org/1999/xhtml">
            <p>SUBSYSTEM: Cofactor and Prosthetic Group Biosynthesis</p>
          </body>
        </notes>
        <listOfReactants>
          <speciesReference species="M_h2o_c" stoichiometry="1" constant="true"/>
          <speciesReference species="M_ahdt_c" stoichiometry="1" constant="true"/>
        </listOfReactants>
        <listOfProducts>
          <speciesReference species="M_ppi_c" stoichiometry="1" constant="true"/>
          <speciesReference species="M_dhpmp_c" stoichiometry="1" constant="true"/>
        </listOfProducts>
        <fbc:geneProductAssociation>
          <fbc:geneProductRef fbc:geneProduct="phoB"/>
        </fbc:geneProductAssociation>
      </reaction>
      <reaction metaid="R_R_folX" id="R_R_folX" name="folX" reversible="true" fast="false" fbc:lowerFluxBound="FB1N1000" fbc:upperFluxBound="FB4N1000">
        <notes>
          <body xmlns="http://www.w3.org/1999/xhtml">
            <p>SUBSYSTEM: Cofactor and Prosthetic Group Biosynthesis</p>
          </body>
        </notes>
        <listOfReactants>
          <speciesReference species="M_h2o_c" stoichiometry="1" constant="true"/>
          <speciesReference species="M_dhpmp_c" stoichiometry="1" constant="true"/>
        </listOfReactants>
        <listOfProducts>
          <speciesReference species="M_h_c" stoichiometry="3" constant="true"/>
          <speciesReference species="M_pi_c" stoichiometry="1" constant="true"/>
          <speciesReference species="M_dhnpt_c" stoichiometry="1" constant="true"/>
        </listOfProducts>
        <fbc:geneProductAssociation>
          <fbc:geneProductRef fbc:geneProduct="folX"/>
        </fbc:geneProductAssociation>
      </reaction>
      <reaction metaid="R_R_folK" id="R_R_folK" name="folK" reversible="false" fast="false" fbc:lowerFluxBound="FB3N0" fbc:upperFluxBound="FB4N1000">
        <notes>
          <body xmlns="http://www.w3.org/1999/xhtml">
            <p>SUBSYSTEM: Cofactor and Prosthetic Group Biosynthesis</p>
          </body>
        </notes>
        <listOfReactants>
          <speciesReference species="M_atp_c" stoichiometry="1" constant="true"/>
          <speciesReference species="M_dhnpt_c" stoichiometry="1" constant="true"/>
        </listOfReactants>
        <listOfProducts>
          <speciesReference species="M_amp_c" stoichiometry="1" constant="true"/>
          <speciesReference species="M_6hmhpt_c" stoichiometry="1" constant="true"/>
        </listOfProducts>
        <fbc:geneProductAssociation>
          <fbc:geneProductRef fbc:geneProduct="folK"/>
        </fbc:geneProductAssociation>
      </reaction>
      <reaction metaid="R_R_folA" id="R_R_folA" name="folA" reversible="true" fast="false" fbc:lowerFluxBound="FB1N1000" fbc:upperFluxBound="FB4N1000">
        <notes>
          <body xmlns="http://www.w3.org/1999/xhtml">
            <p>SUBSYSTEM: Cofactor and Prosthetic Group Biosynthesis</p>
          </body>
        </notes>
        <listOfReactants>
          <speciesReference species="M_h_c" stoichiometry="1" constant="true"/>
          <speciesReference species="M_nadph_c" stoichiometry="1" constant="true"/>
          <speciesReference species="M_dhf_c" stoichiometry="1" constant="true"/>
        </listOfReactants>
        <listOfProducts>
          <speciesReference species="M_nadp_c" stoichiometry="1" constant="true"/>
          <speciesReference species="M_thf_c" stoichiometry="1" constant="true"/>
        </listOfProducts>
        <fbc:geneProductAssociation>
          <fbc:geneProductRef fbc:geneProduct="folA"/>
        </fbc:geneProductAssociation>
      </reaction>
      <reaction metaid="R_R_folD1" id="R_R_folD1" name="folD1" reversible="true" fast="false" fbc:lowerFluxBound="FB1N1000" fbc:upperFluxBound="FB4N1000">
        <notes>
          <body xmlns="http://www.w3.org/1999/xhtml">
            <p>SUBSYSTEM: Folate Metabolism</p>
          </body>
        </notes>
        <listOfReactants>
          <speciesReference species="M_h2o_c" stoichiometry="1" constant="true"/>
          <speciesReference species="M_methf_c" stoichiometry="1" constant="true"/>
        </listOfReactants>
        <listOfProducts>
          <speciesReference species="M_10fthf_c" stoichiometry="1" constant="true"/>
        </listOfProducts>
        <fbc:geneProductAssociation>
          <fbc:geneProductRef fbc:geneProduct="folD1"/>
        </fbc:geneProductAssociation>
      </reaction>
      <reaction metaid="R_R_r6_3_5_8" id="R_R_r6_3_5_8" name="r6.3.5.8" reversible="true" fast="false" fbc:lowerFluxBound="FB1N1000" fbc:upperFluxBound="FB4N1000">
        <notes>
          <body xmlns="http://www.w3.org/1999/xhtml">
            <p>SUBSYSTEM: Cofactor and Prosthetic Group Biosynthesis</p>
          </body>
        </notes>
        <listOfReactants>
          <speciesReference species="M_gln_L_c" stoichiometry="1" constant="true"/>
          <speciesReference species="M_chor_c" stoichiometry="1" constant="true"/>
        </listOfReactants>
        <listOfProducts>
          <speciesReference species="M_glu_L_c" stoichiometry="1" constant="true"/>
          <speciesReference species="M_4adcho_c" stoichiometry="1" constant="true"/>
        </listOfProducts>
        <fbc:geneProductAssociation>
          <fbc:geneProductRef fbc:geneProduct="r6__46__3__46__5__46__8"/>
        </fbc:geneProductAssociation>
      </reaction>
      <reaction metaid="R_R_r4_1_3_58" id="R_R_r4_1_3_58" name="r4.1.3.58" reversible="true" fast="false" fbc:lowerFluxBound="FB1N1000" fbc:upperFluxBound="FB4N1000">
        <notes>
          <body xmlns="http://www.w3.org/1999/xhtml">
            <p>SUBSYSTEM: Cofactor and Prosthetic Group Biosynthesis</p>
          </body>
        </notes>
        <listOfReactants>
          <speciesReference species="M_4adcho_c" stoichiometry="1" constant="true"/>
        </listOfReactants>
        <listOfProducts>
          <speciesReference species="M_pyr_c" stoichiometry="1" constant="true"/>
          <speciesReference species="M_4abz_c" stoichiometry="1" constant="true"/>
        </listOfProducts>
        <fbc:geneProductAssociation>
          <fbc:geneProductRef fbc:geneProduct="r4__46__1__46__3__46__58"/>
        </fbc:geneProductAssociation>
      </reaction>
      <reaction metaid="R_R_sulI" id="R_R_sulI" name="sulI" reversible="false" fast="false" fbc:lowerFluxBound="FB3N0" fbc:upperFluxBound="FB4N1000">
        <notes>
          <body xmlns="http://www.w3.org/1999/xhtml">
            <p>SUBSYSTEM: Cofactor and Prosthetic Group Biosynthesis</p>
          </body>
        </notes>
        <listOfReactants>
          <speciesReference species="M_4abz_c" stoichiometry="1" constant="true"/>
          <speciesReference species="M_6hmhptpp_c" stoichiometry="1" constant="true"/>
        </listOfReactants>
        <listOfProducts>
          <speciesReference species="M_h_c" stoichiometry="1" constant="true"/>
          <speciesReference species="M_ppi_c" stoichiometry="1" constant="true"/>
          <speciesReference species="M_dhpt_c" stoichiometry="1" constant="true"/>
        </listOfProducts>
        <fbc:geneProductAssociation>
          <fbc:geneProductRef fbc:geneProduct="sulI"/>
        </fbc:geneProductAssociation>
      </reaction>
      <reaction metaid="R_R_hom" id="R_R_hom" name="hom" reversible="false" fast="false" fbc:lowerFluxBound="FB3N0" fbc:upperFluxBound="FB4N1000">
        <notes>
          <body xmlns="http://www.w3.org/1999/xhtml">
            <p>SUBSYSTEM: Threonine and Lysine Metabolism</p>
          </body>
        </notes>
        <listOfReactants>
          <speciesReference species="M_h_c" stoichiometry="1" constant="true"/>
          <speciesReference species="M_nadph_c" stoichiometry="1" constant="true"/>
          <speciesReference species="M_aspsa_c" stoichiometry="1" constant="true"/>
        </listOfReactants>
        <listOfProducts>
          <speciesReference species="M_nadp_c" stoichiometry="1" constant="true"/>
          <speciesReference species="M_hom_L_c" stoichiometry="1" constant="true"/>
        </listOfProducts>
        <fbc:geneProductAssociation>
          <fbc:geneProductRef fbc:geneProduct="hom"/>
        </fbc:geneProductAssociation>
      </reaction>
      <reaction metaid="R_R_aroG" id="R_R_aroG" name="aroG" reversible="false" fast="false" fbc:lowerFluxBound="FB3N0" fbc:upperFluxBound="FB4N1000">
        <notes>
          <body xmlns="http://www.w3.org/1999/xhtml">
            <p>SUBSYSTEM: Tyrosine Tryptophan and Phenylalanine Metabolism</p>
          </body>
        </notes>
        <listOfReactants>
          <speciesReference species="M_h2o_c" stoichiometry="1" constant="true"/>
          <speciesReference species="M_pep_c" stoichiometry="1" constant="true"/>
          <speciesReference species="M_e4p_c" stoichiometry="1" constant="true"/>
        </listOfReactants>
        <listOfProducts>
          <speciesReference species="M_h_c" stoichiometry="3" constant="true"/>
          <speciesReference species="M_pi_c" stoichiometry="1" constant="true"/>
          <speciesReference species="M_2dda7p_c" stoichiometry="1" constant="true"/>
        </listOfProducts>
        <fbc:geneProductAssociation>
          <fbc:geneProductRef fbc:geneProduct="aroG"/>
        </fbc:geneProductAssociation>
      </reaction>
      <reaction metaid="R_R_aroB" id="R_R_aroB" name="aroB" reversible="false" fast="false" fbc:lowerFluxBound="FB3N0" fbc:upperFluxBound="FB4N1000">
        <notes>
          <body xmlns="http://www.w3.org/1999/xhtml">
            <p>SUBSYSTEM: Tyrosine Tryptophan and Phenylalanine Metabolism</p>
          </body>
        </notes>
        <listOfReactants>
          <speciesReference species="M_2dda7p_c" stoichiometry="1" constant="true"/>
        </listOfReactants>
        <listOfProducts>
          <speciesReference species="M_h_c" stoichiometry="3" constant="true"/>
          <speciesReference species="M_pi_c" stoichiometry="1" constant="true"/>
          <speciesReference species="M_3dhq_c" stoichiometry="1" constant="true"/>
        </listOfProducts>
        <fbc:geneProductAssociation>
          <fbc:geneProductRef fbc:geneProduct="aroB"/>
        </fbc:geneProductAssociation>
      </reaction>
      <reaction metaid="R_R_aroQ" id="R_R_aroQ" name="aroQ" reversible="false" fast="false" fbc:lowerFluxBound="FB3N0" fbc:upperFluxBound="FB4N1000">
        <notes>
          <body xmlns="http://www.w3.org/1999/xhtml">
            <p>SUBSYSTEM: Tyrosine Tryptophan and Phenylalanine Metabolism</p>
          </body>
        </notes>
        <listOfReactants>
          <speciesReference species="M_3dhq_c" stoichiometry="1" constant="true"/>
        </listOfReactants>
        <listOfProducts>
          <speciesReference species="M_h2o_c" stoichiometry="1" constant="true"/>
          <speciesReference species="M_3dhsk_c" stoichiometry="1" constant="true"/>
        </listOfProducts>
        <fbc:geneProductAssociation>
          <fbc:geneProductRef fbc:geneProduct="aroQ"/>
        </fbc:geneProductAssociation>
      </reaction>
      <reaction metaid="R_R_aroE" id="R_R_aroE" name="aroE" reversible="false" fast="false" fbc:lowerFluxBound="FB3N0" fbc:upperFluxBound="FB4N1000">
        <notes>
          <body xmlns="http://www.w3.org/1999/xhtml">
            <p>SUBSYSTEM: Tyrosine Tryptophan and Phenylalanine Metabolism</p>
          </body>
        </notes>
        <listOfReactants>
          <speciesReference species="M_h_c" stoichiometry="1" constant="true"/>
          <speciesReference species="M_nadph_c" stoichiometry="1" constant="true"/>
          <speciesReference species="M_3dhsk_c" stoichiometry="1" constant="true"/>
        </listOfReactants>
        <listOfProducts>
          <speciesReference species="M_nadp_c" stoichiometry="1" constant="true"/>
          <speciesReference species="M_skm_c" stoichiometry="1" constant="true"/>
        </listOfProducts>
        <fbc:geneProductAssociation>
          <fbc:geneProductRef fbc:geneProduct="aroE"/>
        </fbc:geneProductAssociation>
      </reaction>
      <reaction metaid="R_R_aroK" id="R_R_aroK" name="aroK" reversible="false" fast="false" fbc:lowerFluxBound="FB3N0" fbc:upperFluxBound="FB4N1000">
        <notes>
          <body xmlns="http://www.w3.org/1999/xhtml">
            <p>SUBSYSTEM: Tyrosine Tryptophan and Phenylalanine Metabolism</p>
          </body>
        </notes>
        <listOfReactants>
          <speciesReference species="M_atp_c" stoichiometry="1" constant="true"/>
          <speciesReference species="M_skm_c" stoichiometry="1" constant="true"/>
        </listOfReactants>
        <listOfProducts>
          <speciesReference species="M_adp_c" stoichiometry="1" constant="true"/>
          <speciesReference species="M_skm5p_c" stoichiometry="1" constant="true"/>
        </listOfProducts>
        <fbc:geneProductAssociation>
          <fbc:geneProductRef fbc:geneProduct="aroK"/>
        </fbc:geneProductAssociation>
      </reaction>
      <reaction metaid="R_R_aroA" id="R_R_aroA" name="aroA" reversible="false" fast="false" fbc:lowerFluxBound="FB3N0" fbc:upperFluxBound="FB4N1000">
        <notes>
          <body xmlns="http://www.w3.org/1999/xhtml">
            <p>SUBSYSTEM: Tyrosine Tryptophan and Phenylalanine Metabolism</p>
          </body>
        </notes>
        <listOfReactants>
          <speciesReference species="M_pep_c" stoichiometry="1" constant="true"/>
          <speciesReference species="M_skm5p_c" stoichiometry="1" constant="true"/>
        </listOfReactants>
        <listOfProducts>
          <speciesReference species="M_h_c" stoichiometry="3" constant="true"/>
          <speciesReference species="M_pi_c" stoichiometry="1" constant="true"/>
          <speciesReference species="M_3psme_c" stoichiometry="1" constant="true"/>
        </listOfProducts>
        <fbc:geneProductAssociation>
          <fbc:geneProductRef fbc:geneProduct="aroA"/>
        </fbc:geneProductAssociation>
      </reaction>
      <reaction metaid="R_R_aroC" id="R_R_aroC" name="aroC" reversible="false" fast="false" fbc:lowerFluxBound="FB3N0" fbc:upperFluxBound="FB4N1000">
        <notes>
          <body xmlns="http://www.w3.org/1999/xhtml">
            <p>SUBSYSTEM: Tyrosine Tryptophan and Phenylalanine Metabolism</p>
          </body>
        </notes>
        <listOfReactants>
          <speciesReference species="M_3psme_c" stoichiometry="1" constant="true"/>
        </listOfReactants>
        <listOfProducts>
          <speciesReference species="M_h_c" stoichiometry="3" constant="true"/>
          <speciesReference species="M_pi_c" stoichiometry="1" constant="true"/>
          <speciesReference species="M_chor_c" stoichiometry="1" constant="true"/>
        </listOfProducts>
        <fbc:geneProductAssociation>
          <fbc:geneProductRef fbc:geneProduct="aroC"/>
        </fbc:geneProductAssociation>
      </reaction>
      <reaction metaid="R_R_otsB" id="R_R_otsB" name="otsB" reversible="true" fast="false" fbc:lowerFluxBound="FB1N1000" fbc:upperFluxBound="FB4N1000">
        <notes>
          <body xmlns="http://www.w3.org/1999/xhtml">
            <p>SUBSYSTEM: Alternate Carbon Metabolism</p>
          </body>
        </notes>
        <listOfReactants>
          <speciesReference species="M_h2o_c" stoichiometry="1" constant="true"/>
          <speciesReference species="M_tre6p_c" stoichiometry="1" constant="true"/>
        </listOfReactants>
        <listOfProducts>
          <speciesReference species="M_h_c" stoichiometry="3" constant="true"/>
          <speciesReference species="M_pi_c" stoichiometry="1" constant="true"/>
          <speciesReference species="M_tre_c" stoichiometry="1" constant="true"/>
        </listOfProducts>
        <fbc:geneProductAssociation>
          <fbc:geneProductRef fbc:geneProduct="otsB"/>
        </fbc:geneProductAssociation>
      </reaction>
      <reaction metaid="R_R_otsA" id="R_R_otsA" name="otsA" reversible="true" fast="false" fbc:lowerFluxBound="FB1N1000" fbc:upperFluxBound="FB4N1000">
        <notes>
          <body xmlns="http://www.w3.org/1999/xhtml">
            <p>SUBSYSTEM: Alternate Carbon Metabolism</p>
          </body>
        </notes>
        <listOfReactants>
          <speciesReference species="M_g6p_c" stoichiometry="1" constant="true"/>
          <speciesReference species="M_udpg_c" stoichiometry="1" constant="true"/>
        </listOfReactants>
        <listOfProducts>
          <speciesReference species="M_udp_c" stoichiometry="1" constant="true"/>
          <speciesReference species="M_tre6p_c" stoichiometry="1" constant="true"/>
        </listOfProducts>
        <fbc:geneProductAssociation>
          <fbc:geneProductRef fbc:geneProduct="otsA"/>
        </fbc:geneProductAssociation>
      </reaction>
      <reaction metaid="R_R_glgC" id="R_R_glgC" name="glgC" reversible="false" fast="false" fbc:lowerFluxBound="FB3N0" fbc:upperFluxBound="FB4N1000">
        <notes>
          <body xmlns="http://www.w3.org/1999/xhtml">
            <p>SUBSYSTEM: Alternate Carbon Metabolism</p>
          </body>
        </notes>
        <listOfReactants>
          <speciesReference species="M_atp_c" stoichiometry="1" constant="true"/>
          <speciesReference species="M_g1p_c" stoichiometry="1" constant="true"/>
        </listOfReactants>
        <listOfProducts>
          <speciesReference species="M_ppi_c" stoichiometry="1" constant="true"/>
          <speciesReference species="M_adpglc_c" stoichiometry="1" constant="true"/>
        </listOfProducts>
        <fbc:geneProductAssociation>
          <fbc:geneProductRef fbc:geneProduct="glgC"/>
        </fbc:geneProductAssociation>
      </reaction>
      <reaction metaid="R_R_pmmB" id="R_R_pmmB" name="pmmB" reversible="true" fast="false" fbc:lowerFluxBound="FB1N1000" fbc:upperFluxBound="FB4N1000">
        <notes>
          <body xmlns="http://www.w3.org/1999/xhtml">
            <p>SUBSYSTEM: Alternate Carbon Metabolism</p>
          </body>
        </notes>
        <listOfReactants>
          <speciesReference species="M_g1p_c" stoichiometry="1" constant="true"/>
        </listOfReactants>
        <listOfProducts>
          <speciesReference species="M_g6p_c" stoichiometry="1" constant="true"/>
        </listOfProducts>
        <fbc:geneProductAssociation>
          <fbc:geneProductRef fbc:geneProduct="pmmB"/>
        </fbc:geneProductAssociation>
      </reaction>
      <reaction metaid="R_R_glgA" id="R_R_glgA" name="glgA" reversible="false" fast="false" fbc:lowerFluxBound="FB3N0" fbc:upperFluxBound="FB4N1000">
        <notes>
          <body xmlns="http://www.w3.org/1999/xhtml">
            <p>SUBSYSTEM: Alternate Carbon Metabolism</p>
          </body>
        </notes>
        <listOfReactants>
          <speciesReference species="M_adpglc_c" stoichiometry="1" constant="true"/>
        </listOfReactants>
        <listOfProducts>
          <speciesReference species="M_adp_c" stoichiometry="1" constant="true"/>
          <speciesReference species="M_glycogen_c" stoichiometry="1" constant="true"/>
        </listOfProducts>
        <fbc:geneProductAssociation>
          <fbc:geneProductRef fbc:geneProduct="glgA"/>
        </fbc:geneProductAssociation>
      </reaction>
      <reaction metaid="R_R_scrB" id="R_R_scrB" name="scrB" reversible="false" fast="false" fbc:lowerFluxBound="FB3N0" fbc:upperFluxBound="FB4N1000">
        <notes>
          <body xmlns="http://www.w3.org/1999/xhtml">
            <p>SUBSYSTEM: Alternate Carbon Metabolism</p>
          </body>
        </notes>
        <listOfReactants>
          <speciesReference species="M_h2o_c" stoichiometry="1" constant="true"/>
          <speciesReference species="M_suc6p_c" stoichiometry="1" constant="true"/>
        </listOfReactants>
        <listOfProducts>
          <speciesReference species="M_g6p_c" stoichiometry="1" constant="true"/>
          <speciesReference species="M_fru_c" stoichiometry="1" constant="true"/>
        </listOfProducts>
        <fbc:geneProductAssociation>
          <fbc:geneProductRef fbc:geneProduct="scrB"/>
        </fbc:geneProductAssociation>
      </reaction>
      <reaction metaid="R_R_pfkB" id="R_R_pfkB" name="pfkB" reversible="true" fast="false" fbc:lowerFluxBound="FB1N1000" fbc:upperFluxBound="FB4N1000">
        <notes>
          <body xmlns="http://www.w3.org/1999/xhtml">
            <p>SUBSYSTEM: Alternate Carbon Metabolism</p>
          </body>
        </notes>
        <listOfReactants>
          <speciesReference species="M_atp_c" stoichiometry="1" constant="true"/>
          <speciesReference species="M_f1p_c" stoichiometry="1" constant="true"/>
        </listOfReactants>
        <listOfProducts>
          <speciesReference species="M_adp_c" stoichiometry="1" constant="true"/>
          <speciesReference species="M_fdp_c" stoichiometry="1" constant="true"/>
        </listOfProducts>
        <fbc:geneProductAssociation>
          <fbc:geneProductRef fbc:geneProduct="pfkB"/>
        </fbc:geneProductAssociation>
      </reaction>
      <reaction metaid="R_R_GLC_t_PEP" id="R_R_GLC_t_PEP" name="GLC_t_PEP" reversible="false" fast="false" fbc:lowerFluxBound="FB3N0" fbc:upperFluxBound="FB4N1000">
        <notes>
          <body xmlns="http://www.w3.org/1999/xhtml">
            <p>SUBSYSTEM: Transport Extracellular</p>
          </body>
        </notes>
        <listOfReactants>
          <speciesReference species="M_pep_c" stoichiometry="1" constant="true"/>
          <speciesReference species="M_glc_D_e" stoichiometry="1" constant="true"/>
        </listOfReactants>
        <listOfProducts>
          <speciesReference species="M_g6p_c" stoichiometry="1" constant="true"/>
          <speciesReference species="M_pyr_c" stoichiometry="1" constant="true"/>
        </listOfProducts>
        <fbc:geneProductAssociation>
          <fbc:geneProductRef fbc:geneProduct="GLC_in_PEP"/>
        </fbc:geneProductAssociation>
      </reaction>
      <reaction metaid="R_R_AC_d" id="R_R_AC_d" name="AC_d" reversible="true" fast="false" fbc:lowerFluxBound="FB1N1000" fbc:upperFluxBound="FB4N1000">
        <notes>
          <body xmlns="http://www.w3.org/1999/xhtml">
            <p>SUBSYSTEM: Exchange</p>
          </body>
        </notes>
        <listOfReactants>
          <speciesReference species="M_ac_e" stoichiometry="1" constant="true"/>
        </listOfReactants>
        <listOfProducts>
          <speciesReference species="M_ac_c" stoichiometry="1" constant="true"/>
        </listOfProducts>
        <fbc:geneProductAssociation>
          <fbc:geneProductRef fbc:geneProduct="AC_in_out"/>
        </fbc:geneProductAssociation>
      </reaction>
      <reaction metaid="R_R_CO2_d" id="R_R_CO2_d" name="CO2_d" reversible="true" fast="false" fbc:lowerFluxBound="FB1N1000" fbc:upperFluxBound="FB4N1000">
        <notes>
          <body xmlns="http://www.w3.org/1999/xhtml">
            <p>SUBSYSTEM: Transport Extracellular</p>
          </body>
        </notes>
        <listOfReactants>
          <speciesReference species="M_co2_c" stoichiometry="1" constant="true"/>
        </listOfReactants>
        <listOfProducts>
          <speciesReference species="M_co2_e" stoichiometry="1" constant="true"/>
        </listOfProducts>
        <fbc:geneProductAssociation>
          <fbc:geneProductRef fbc:geneProduct="CO2t"/>
        </fbc:geneProductAssociation>
      </reaction>
      <reaction metaid="R_R_O2_d" id="R_R_O2_d" name="O2_d" reversible="false" fast="false" fbc:lowerFluxBound="FB3N0" fbc:upperFluxBound="FB4N1000">
        <notes>
          <body xmlns="http://www.w3.org/1999/xhtml">
            <p>SUBSYSTEM: Transport Extracellular</p>
          </body>
        </notes>
        <listOfReactants>
          <speciesReference species="M_o2_e" stoichiometry="1" constant="true"/>
        </listOfReactants>
        <listOfProducts>
          <speciesReference species="M_o2_c" stoichiometry="1" constant="true"/>
        </listOfProducts>
        <fbc:geneProductAssociation>
          <fbc:geneProductRef fbc:geneProduct="O2_diffusion"/>
        </fbc:geneProductAssociation>
      </reaction>
      <reaction metaid="R_R_H2O_d" id="R_R_H2O_d" name="H2O_d" reversible="true" fast="false" fbc:lowerFluxBound="FB1N1000" fbc:upperFluxBound="FB4N1000">
        <notes>
          <body xmlns="http://www.w3.org/1999/xhtml">
            <p>SUBSYSTEM: Transport Extracellular</p>
          </body>
        </notes>
        <listOfReactants>
          <speciesReference species="M_h2o_e" stoichiometry="1" constant="true"/>
        </listOfReactants>
        <listOfProducts>
          <speciesReference species="M_h2o_c" stoichiometry="1" constant="true"/>
        </listOfProducts>
        <fbc:geneProductAssociation/>
      </reaction>
      <reaction metaid="R_R_LAC_L_d" id="R_R_LAC_L_d" name="LAC-L_d" reversible="true" fast="false" fbc:lowerFluxBound="FB1N1000" fbc:upperFluxBound="FB4N1000">
        <notes>
          <body xmlns="http://www.w3.org/1999/xhtml">
            <p>SUBSYSTEM: Exchange</p>
          </body>
        </notes>
        <listOfReactants>
          <speciesReference species="M_lac_L_e" stoichiometry="1" constant="true"/>
        </listOfReactants>
        <listOfProducts>
          <speciesReference species="M_lac_L_c" stoichiometry="1" constant="true"/>
        </listOfProducts>
        <fbc:geneProductAssociation>
          <fbc:geneProductRef fbc:geneProduct="LLAC_in_out"/>
        </fbc:geneProductAssociation>
      </reaction>
      <reaction metaid="R_R_so3_d" id="R_R_so3_d" name="so3_d" reversible="true" fast="false" fbc:lowerFluxBound="FB1N1000" fbc:upperFluxBound="FB4N1000">
        <notes>
          <body xmlns="http://www.w3.org/1999/xhtml">
            <p>SUBSYSTEM: Transport Extracellular</p>
          </body>
        </notes>
        <listOfReactants>
          <speciesReference species="M_so3_e" stoichiometry="1" constant="true"/>
        </listOfReactants>
        <listOfProducts>
          <speciesReference species="M_so3_c" stoichiometry="1" constant="true"/>
        </listOfProducts>
        <fbc:geneProductAssociation>
          <fbc:geneProductRef fbc:geneProduct="SLF_diffusion"/>
        </fbc:geneProductAssociation>
      </reaction>
      <reaction metaid="R_R_SUC_d" id="R_R_SUC_d" name="SUC_d" reversible="false" fast="false" fbc:lowerFluxBound="FB3N0" fbc:upperFluxBound="FB3N0">
        <notes>
          <body xmlns="http://www.w3.org/1999/xhtml">
            <p>SUBSYSTEM: </p>
          </body>
        </notes>
        <listOfReactants>
          <speciesReference species="M_suc_c" stoichiometry="1" constant="true"/>
        </listOfReactants>
        <listOfProducts>
          <speciesReference species="M_suc_e" stoichiometry="1" constant="true"/>
        </listOfProducts>
        <fbc:geneProductAssociation/>
      </reaction>
      <reaction metaid="R_R_GLU_d" id="R_R_GLU_d" name="GLU_d" reversible="false" fast="false" fbc:lowerFluxBound="FB3N0" fbc:upperFluxBound="FB3N0">
        <notes>
          <body xmlns="http://www.w3.org/1999/xhtml">
            <p>SUBSYSTEM: </p>
          </body>
        </notes>
        <listOfReactants>
          <speciesReference species="M_glu_L_e" stoichiometry="1" constant="true"/>
        </listOfReactants>
        <listOfProducts>
          <speciesReference species="M_glu_L_c" stoichiometry="1" constant="true"/>
        </listOfProducts>
        <fbc:geneProductAssociation/>
      </reaction>
      <reaction metaid="R_R_NH3_t_H" id="R_R_NH3_t_H" name="NH3_t_H" reversible="false" fast="false" fbc:lowerFluxBound="FB3N0" fbc:upperFluxBound="FB3N0">
        <notes>
          <body xmlns="http://www.w3.org/1999/xhtml">
            <p>SUBSYSTEM: Transport Extracellular</p>
          </body>
        </notes>
        <listOfReactants>
          <speciesReference species="M_h_e" stoichiometry="1" constant="true"/>
          <speciesReference species="M_nh3_e" stoichiometry="1" constant="true"/>
        </listOfReactants>
        <listOfProducts>
          <speciesReference species="M_h_c" stoichiometry="1" constant="true"/>
          <speciesReference species="M_nh3_c" stoichiometry="1" constant="true"/>
        </listOfProducts>
        <fbc:geneProductAssociation>
          <fbc:geneProductRef fbc:geneProduct="NH3_t_H"/>
        </fbc:geneProductAssociation>
      </reaction>
      <reaction metaid="R_R_PI_t_H" id="R_R_PI_t_H" name="PI_t_H" reversible="false" fast="false" fbc:lowerFluxBound="FB3N0" fbc:upperFluxBound="FB3N0">
        <notes>
          <body xmlns="http://www.w3.org/1999/xhtml">
            <p>SUBSYSTEM: Transport Extracellular</p>
          </body>
        </notes>
        <listOfReactants>
          <speciesReference species="M_h_e" stoichiometry="1" constant="true"/>
          <speciesReference species="M_pi_e" stoichiometry="1" constant="true"/>
        </listOfReactants>
        <listOfProducts>
          <speciesReference species="M_h_c" stoichiometry="1" constant="true"/>
          <speciesReference species="M_pi_c" stoichiometry="1" constant="true"/>
        </listOfProducts>
        <fbc:geneProductAssociation>
          <fbc:geneProductRef fbc:geneProduct="Phosphate_H"/>
        </fbc:geneProductAssociation>
      </reaction>
      <reaction metaid="R_R_GLU_t_H" id="R_R_GLU_t_H" name="GLU_t_H" reversible="false" fast="false" fbc:lowerFluxBound="FB3N0" fbc:upperFluxBound="FB3N0">
        <notes>
          <body xmlns="http://www.w3.org/1999/xhtml">
            <p>SUBSYSTEM: Transport Extracellular</p>
          </body>
        </notes>
        <listOfReactants>
          <speciesReference species="M_h_e" stoichiometry="1" constant="true"/>
          <speciesReference species="M_glu_L_e" stoichiometry="1" constant="true"/>
        </listOfReactants>
        <listOfProducts>
          <speciesReference species="M_h_c" stoichiometry="1" constant="true"/>
          <speciesReference species="M_glu_L_c" stoichiometry="1" constant="true"/>
        </listOfProducts>
        <fbc:geneProductAssociation>
          <fbc:geneProductRef fbc:geneProduct="GLU_H"/>
        </fbc:geneProductAssociation>
      </reaction>
      <reaction metaid="R_R_GLN_t_NA" id="R_R_GLN_t_NA" name="GLN_t_NA" reversible="false" fast="false" fbc:lowerFluxBound="FB3N0" fbc:upperFluxBound="FB3N0">
        <notes>
          <body xmlns="http://www.w3.org/1999/xhtml">
            <p>SUBSYSTEM: </p>
          </body>
        </notes>
        <listOfReactants>
          <speciesReference species="M_gln_L_e" stoichiometry="1" constant="true"/>
          <speciesReference species="M_na_e" stoichiometry="1" constant="true"/>
        </listOfReactants>
        <listOfProducts>
          <speciesReference species="M_gln_L_c" stoichiometry="1" constant="true"/>
          <speciesReference species="M_na_c" stoichiometry="1" constant="true"/>
        </listOfProducts>
        <fbc:geneProductAssociation/>
      </reaction>
      <reaction metaid="R_R_ALA_t_NA" id="R_R_ALA_t_NA" name="ALA_t_NA" reversible="false" fast="false" fbc:lowerFluxBound="FB3N0" fbc:upperFluxBound="FB3N0">
        <notes>
          <body xmlns="http://www.w3.org/1999/xhtml">
            <p>SUBSYSTEM: Transport Extracellular</p>
          </body>
        </notes>
        <listOfReactants>
          <speciesReference species="M_na_e" stoichiometry="1" constant="true"/>
          <speciesReference species="M_ala_L_e" stoichiometry="1" constant="true"/>
        </listOfReactants>
        <listOfProducts>
          <speciesReference species="M_ala_L_c" stoichiometry="1" constant="true"/>
          <speciesReference species="M_na_c" stoichiometry="1" constant="true"/>
        </listOfProducts>
        <fbc:geneProductAssociation>
          <fbc:geneProductRef fbc:geneProduct="ALA_S"/>
        </fbc:geneProductAssociation>
      </reaction>
      <reaction metaid="R_R_VAL_t_NA" id="R_R_VAL_t_NA" name="VAL_t_NA" reversible="false" fast="false" fbc:lowerFluxBound="FB3N0" fbc:upperFluxBound="FB3N0">
        <notes>
          <body xmlns="http://www.w3.org/1999/xhtml">
            <p>SUBSYSTEM: Transport Extracellular</p>
          </body>
        </notes>
        <listOfReactants>
          <speciesReference species="M_na_e" stoichiometry="1" constant="true"/>
          <speciesReference species="M_val_L_e" stoichiometry="1" constant="true"/>
        </listOfReactants>
        <listOfProducts>
          <speciesReference species="M_val_L_c" stoichiometry="1" constant="true"/>
          <speciesReference species="M_na_c" stoichiometry="1" constant="true"/>
        </listOfProducts>
        <fbc:geneProductAssociation>
          <fbc:geneProductRef fbc:geneProduct="VAL_S"/>
        </fbc:geneProductAssociation>
      </reaction>
      <reaction metaid="R_R_LYS_t_H" id="R_R_LYS_t_H" name="LYS_t_H" reversible="false" fast="false" fbc:lowerFluxBound="FB3N0" fbc:upperFluxBound="FB3N0">
        <notes>
          <body xmlns="http://www.w3.org/1999/xhtml">
            <p>SUBSYSTEM: Transport Extracellular</p>
          </body>
        </notes>
        <listOfReactants>
          <speciesReference species="M_h_e" stoichiometry="2" constant="true"/>
          <speciesReference species="M_lys_L_c" stoichiometry="1" constant="true"/>
        </listOfReactants>
        <listOfProducts>
          <speciesReference species="M_h_c" stoichiometry="2" constant="true"/>
          <speciesReference species="M_lys_L_e" stoichiometry="1" constant="true"/>
        </listOfProducts>
        <fbc:geneProductAssociation>
          <fbc:geneProductRef fbc:geneProduct="LysE"/>
        </fbc:geneProductAssociation>
      </reaction>
      <reaction metaid="R_R_CIT_t_H" id="R_R_CIT_t_H" name="CIT_t_H" reversible="false" fast="false" fbc:lowerFluxBound="FB3N0" fbc:upperFluxBound="FB3N0">
        <notes>
          <body xmlns="http://www.w3.org/1999/xhtml">
            <p>SUBSYSTEM: Transport Extracellular</p>
          </body>
        </notes>
        <listOfReactants>
          <speciesReference species="M_h_e" stoichiometry="1" constant="true"/>
          <speciesReference species="M_cit_e" stoichiometry="1" constant="true"/>
        </listOfReactants>
        <listOfProducts>
          <speciesReference species="M_h_c" stoichiometry="1" constant="true"/>
          <speciesReference species="M_cit_c" stoichiometry="1" constant="true"/>
        </listOfProducts>
        <fbc:geneProductAssociation>
          <fbc:geneProductRef fbc:geneProduct="CIT_H"/>
        </fbc:geneProductAssociation>
      </reaction>
      <reaction metaid="R_R_LEU_t_NA" id="R_R_LEU_t_NA" name="LEU_t_NA" reversible="false" fast="false" fbc:lowerFluxBound="FB3N0" fbc:upperFluxBound="FB3N0">
        <notes>
          <body xmlns="http://www.w3.org/1999/xhtml">
            <p>SUBSYSTEM: Transport Extracellular</p>
          </body>
        </notes>
        <listOfReactants>
          <speciesReference species="M_na_e" stoichiometry="1" constant="true"/>
          <speciesReference species="M_leu_L_e" stoichiometry="1" constant="true"/>
        </listOfReactants>
        <listOfProducts>
          <speciesReference species="M_leu_L_c" stoichiometry="1" constant="true"/>
          <speciesReference species="M_na_c" stoichiometry="1" constant="true"/>
        </listOfProducts>
        <fbc:geneProductAssociation>
          <fbc:geneProductRef fbc:geneProduct="LEU_S"/>
        </fbc:geneProductAssociation>
      </reaction>
      <reaction metaid="R_R_TYR_t_ATP" id="R_R_TYR_t_ATP" name="TYR_t_ATP" reversible="false" fast="false" fbc:lowerFluxBound="FB3N0" fbc:upperFluxBound="FB3N0">
        <notes>
          <body xmlns="http://www.w3.org/1999/xhtml">
            <p>SUBSYSTEM: Transport Extracellular</p>
          </body>
        </notes>
        <listOfReactants>
          <speciesReference species="M_atp_c" stoichiometry="1" constant="true"/>
          <speciesReference species="M_h2o_c" stoichiometry="1" constant="true"/>
          <speciesReference species="M_tyr_L_e" stoichiometry="1" constant="true"/>
        </listOfReactants>
        <listOfProducts>
          <speciesReference species="M_h_c" stoichiometry="1" constant="true"/>
          <speciesReference species="M_adp_c" stoichiometry="1" constant="true"/>
          <speciesReference species="M_pi_c" stoichiometry="1" constant="true"/>
          <speciesReference species="M_tyr_L_c" stoichiometry="1" constant="true"/>
        </listOfProducts>
        <fbc:geneProductAssociation>
          <fbc:geneProductRef fbc:geneProduct="aroP2_ATP"/>
        </fbc:geneProductAssociation>
      </reaction>
      <reaction metaid="R_R_TRP_t_ATP" id="R_R_TRP_t_ATP" name="TRP_t_ATP" reversible="false" fast="false" fbc:lowerFluxBound="FB3N0" fbc:upperFluxBound="FB3N0">
        <notes>
          <body xmlns="http://www.w3.org/1999/xhtml">
            <p>SUBSYSTEM: Transport Extracellular</p>
          </body>
        </notes>
        <listOfReactants>
          <speciesReference species="M_atp_c" stoichiometry="1" constant="true"/>
          <speciesReference species="M_h2o_c" stoichiometry="1" constant="true"/>
          <speciesReference species="M_trp_L_e" stoichiometry="1" constant="true"/>
        </listOfReactants>
        <listOfProducts>
          <speciesReference species="M_h_c" stoichiometry="1" constant="true"/>
          <speciesReference species="M_adp_c" stoichiometry="1" constant="true"/>
          <speciesReference species="M_pi_c" stoichiometry="1" constant="true"/>
          <speciesReference species="M_trp_L_c" stoichiometry="1" constant="true"/>
        </listOfProducts>
        <fbc:geneProductAssociation>
          <fbc:geneProductRef fbc:geneProduct="aroP1_ATP"/>
        </fbc:geneProductAssociation>
      </reaction>
      <reaction metaid="R_R_PRO_t_NA" id="R_R_PRO_t_NA" name="PRO_t_NA" reversible="false" fast="false" fbc:lowerFluxBound="FB3N0" fbc:upperFluxBound="FB3N0">
        <notes>
          <body xmlns="http://www.w3.org/1999/xhtml">
            <p>SUBSYSTEM: Transport Extracellular</p>
          </body>
        </notes>
        <listOfReactants>
          <speciesReference species="M_na_e" stoichiometry="1" constant="true"/>
          <speciesReference species="M_pro_L_e" stoichiometry="1" constant="true"/>
        </listOfReactants>
        <listOfProducts>
          <speciesReference species="M_pro_L_c" stoichiometry="1" constant="true"/>
          <speciesReference species="M_na_c" stoichiometry="1" constant="true"/>
        </listOfProducts>
        <fbc:geneProductAssociation>
          <fbc:geneProductRef fbc:geneProduct="PRO_S"/>
        </fbc:geneProductAssociation>
      </reaction>
      <reaction metaid="R_R_ILE_t_NA" id="R_R_ILE_t_NA" name="ILE_t_NA" reversible="false" fast="false" fbc:lowerFluxBound="FB3N0" fbc:upperFluxBound="FB3N0">
        <notes>
          <body xmlns="http://www.w3.org/1999/xhtml">
            <p>SUBSYSTEM: Transport Extracellular</p>
          </body>
        </notes>
        <listOfReactants>
          <speciesReference species="M_na_e" stoichiometry="1" constant="true"/>
          <speciesReference species="M_ile_L_e" stoichiometry="1" constant="true"/>
        </listOfReactants>
        <listOfProducts>
          <speciesReference species="M_ile_L_c" stoichiometry="1" constant="true"/>
          <speciesReference species="M_na_c" stoichiometry="1" constant="true"/>
        </listOfProducts>
        <fbc:geneProductAssociation>
          <fbc:geneProductRef fbc:geneProduct="ILE_S"/>
        </fbc:geneProductAssociation>
      </reaction>
      <reaction metaid="R_R_MET_t_ATP" id="R_R_MET_t_ATP" name="MET_t_ATP" reversible="false" fast="false" fbc:lowerFluxBound="FB3N0" fbc:upperFluxBound="FB3N0">
        <notes>
          <body xmlns="http://www.w3.org/1999/xhtml">
            <p>SUBSYSTEM: Transport Extracellular</p>
          </body>
        </notes>
        <listOfReactants>
          <speciesReference species="M_atp_c" stoichiometry="1" constant="true"/>
          <speciesReference species="M_h2o_c" stoichiometry="1" constant="true"/>
          <speciesReference species="M_met_L_e" stoichiometry="1" constant="true"/>
        </listOfReactants>
        <listOfProducts>
          <speciesReference species="M_h_c" stoichiometry="1" constant="true"/>
          <speciesReference species="M_adp_c" stoichiometry="1" constant="true"/>
          <speciesReference species="M_pi_c" stoichiometry="1" constant="true"/>
          <speciesReference species="M_met_L_c" stoichiometry="1" constant="true"/>
        </listOfProducts>
        <fbc:geneProductAssociation>
          <fbc:geneProductRef fbc:geneProduct="MET_ATP"/>
        </fbc:geneProductAssociation>
      </reaction>
      <reaction metaid="R_R_SER_t_NA" id="R_R_SER_t_NA" name="SER_t_NA" reversible="false" fast="false" fbc:lowerFluxBound="FB3N0" fbc:upperFluxBound="FB3N0">
        <notes>
          <body xmlns="http://www.w3.org/1999/xhtml">
            <p>SUBSYSTEM: </p>
          </body>
        </notes>
        <listOfReactants>
          <speciesReference species="M_na_e" stoichiometry="1" constant="true"/>
          <speciesReference species="M_ser_L_e" stoichiometry="1" constant="true"/>
        </listOfReactants>
        <listOfProducts>
          <speciesReference species="M_ser_L_c" stoichiometry="1" constant="true"/>
          <speciesReference species="M_na_c" stoichiometry="1" constant="true"/>
        </listOfProducts>
        <fbc:geneProductAssociation/>
      </reaction>
      <reaction metaid="R_R_THR_t_H" id="R_R_THR_t_H" name="THR_t_H" reversible="false" fast="false" fbc:lowerFluxBound="FB3N0" fbc:upperFluxBound="FB3N0">
        <notes>
          <body xmlns="http://www.w3.org/1999/xhtml">
            <p>SUBSYSTEM: </p>
          </body>
        </notes>
        <listOfReactants>
          <speciesReference species="M_h_e" stoichiometry="1" constant="true"/>
          <speciesReference species="M_thr_L_c" stoichiometry="1" constant="true"/>
        </listOfReactants>
        <listOfProducts>
          <speciesReference species="M_h_c" stoichiometry="1" constant="true"/>
          <speciesReference species="M_thr_L_e" stoichiometry="1" constant="true"/>
        </listOfProducts>
        <fbc:geneProductAssociation>
          <fbc:geneProductRef fbc:geneProduct="rhtc"/>
        </fbc:geneProductAssociation>
      </reaction>
      <reaction metaid="R_R_ARG_t_H" id="R_R_ARG_t_H" name="ARG_t_H" reversible="false" fast="false" fbc:lowerFluxBound="FB3N0" fbc:upperFluxBound="FB3N0">
        <notes>
          <body xmlns="http://www.w3.org/1999/xhtml">
            <p>SUBSYSTEM: </p>
          </body>
        </notes>
        <listOfReactants>
          <speciesReference species="M_h_e" stoichiometry="1" constant="true"/>
          <speciesReference species="M_arg_L_e" stoichiometry="1" constant="true"/>
        </listOfReactants>
        <listOfProducts>
          <speciesReference species="M_h_c" stoichiometry="1" constant="true"/>
          <speciesReference species="M_arg_L_c" stoichiometry="1" constant="true"/>
        </listOfProducts>
        <fbc:geneProductAssociation/>
      </reaction>
      <reaction metaid="R_R_biomass_a" id="R_R_biomass_a" name="biomass_a" reversible="false" fast="false" fbc:lowerFluxBound="FB3N0" fbc:upperFluxBound="FB4N1000">
        <notes>
          <body xmlns="http://www.w3.org/1999/xhtml">
            <p>SUBSYSTEM: </p>
          </body>
        </notes>
        <listOfReactants>
          <speciesReference species="M_atp_c" stoichiometry="47.7" constant="true"/>
          <speciesReference species="M_PROTEIN_c" stoichiometry="1" constant="true"/>
          <speciesReference species="M_DNA_c" stoichiometry="0.01" constant="true"/>
          <speciesReference species="M_RNA_c" stoichiometry="0.05" constant="true"/>
          <speciesReference species="M_PHOSPHOLIPID_c" stoichiometry="0.028" constant="true"/>
          <speciesReference species="M_PEPTIDOGLYCAN_c" stoichiometry="0.095" constant="true"/>
          <speciesReference species="M_ARABINOGALACTAN_c" stoichiometry="0.095" constant="true"/>
          <speciesReference species="M_MYCOLICACID_c" stoichiometry="0.102" constant="true"/>
        </listOfReactants>
        <listOfProducts>
          <speciesReference species="M_adp_c" stoichiometry="47.7" constant="true"/>
          <speciesReference species="M_pi_c" stoichiometry="47.7" constant="true"/>
        </listOfProducts>
        <fbc:geneProductAssociation>
          <fbc:geneProductRef fbc:geneProduct="biomass_ass"/>
        </fbc:geneProductAssociation>
      </reaction>
      <reaction metaid="R_R_PROTEIN_a" id="R_R_PROTEIN_a" name="PROTEIN_a" reversible="false" fast="false" fbc:lowerFluxBound="FB3N0" fbc:upperFluxBound="FB4N1000">
        <notes>
          <body xmlns="http://www.w3.org/1999/xhtml">
            <p>SUBSYSTEM: </p>
          </body>
        </notes>
        <listOfReactants>
          <speciesReference species="M_atp_c" stoichiometry="19.7" constant="true"/>
          <speciesReference species="M_pro_L_c" stoichiometry="0.159" constant="true"/>
          <speciesReference species="M_ser_L_c" stoichiometry="0.245" constant="true"/>
          <speciesReference species="M_gln_L_c" stoichiometry="0.342" constant="true"/>
          <speciesReference species="M_glu_L_c" stoichiometry="0.548" constant="true"/>
          <speciesReference species="M_gly_c" stoichiometry="0.353" constant="true"/>
          <speciesReference species="M_asp_L_c" stoichiometry="0.194" constant="true"/>
          <speciesReference species="M_val_L_c" stoichiometry="0.273" constant="true"/>
          <speciesReference species="M_ala_L_c" stoichiometry="0.666" constant="true"/>
          <speciesReference species="M_lys_L_c" stoichiometry="0.187" constant="true"/>
          <speciesReference species="M_arg_L_c" stoichiometry="0.19" constant="true"/>
          <speciesReference species="M_asn_L_c" stoichiometry="0.194" constant="true"/>
          <speciesReference species="M_thr_L_c" stoichiometry="0.273" constant="true"/>
          <speciesReference species="M_ile_L_c" stoichiometry="0.189" constant="true"/>
          <speciesReference species="M_leu_L_c" stoichiometry="0.351" constant="true"/>
          <speciesReference species="M_tyr_L_c" stoichiometry="0.078" constant="true"/>
          <speciesReference species="M_trp_L_c" stoichiometry="0.028" constant="true"/>
          <speciesReference species="M_cys_L_c" stoichiometry="0.044" constant="true"/>
          <speciesReference species="M_phe_L_c" stoichiometry="0.128" constant="true"/>
          <speciesReference species="M_met_L_c" stoichiometry="0.076" constant="true"/>
          <speciesReference species="M_his_L_c" stoichiometry="0.067" constant="true"/>
        </listOfReactants>
        <listOfProducts>
          <speciesReference species="M_adp_c" stoichiometry="19.7" constant="true"/>
          <speciesReference species="M_pi_c" stoichiometry="19.7" constant="true"/>
          <speciesReference species="M_PROTEIN_c" stoichiometry="1" constant="true"/>
        </listOfProducts>
        <fbc:geneProductAssociation>
          <fbc:geneProductRef fbc:geneProduct="PROTEIN_Ass"/>
        </fbc:geneProductAssociation>
      </reaction>
      <reaction metaid="R_R_DNA_a" id="R_R_DNA_a" name="DNA_a" reversible="false" fast="false" fbc:lowerFluxBound="FB3N0" fbc:upperFluxBound="FB4N1000">
        <notes>
          <body xmlns="http://www.w3.org/1999/xhtml">
            <p>SUBSYSTEM: </p>
          </body>
        </notes>
        <listOfReactants>
          <speciesReference species="M_atp_c" stoichiometry="4.44" constant="true"/>
          <speciesReference species="M_dtmp_c" stoichiometry="0.748" constant="true"/>
          <speciesReference species="M_dgmp_c" stoichiometry="0.871" constant="true"/>
          <speciesReference species="M_damp_c" stoichiometry="0.748" constant="true"/>
          <speciesReference species="M_dcmp_c" stoichiometry="0.871" constant="true"/>
        </listOfReactants>
        <listOfProducts>
          <speciesReference species="M_adp_c" stoichiometry="4.44" constant="true"/>
          <speciesReference species="M_pi_c" stoichiometry="4.44" constant="true"/>
          <speciesReference species="M_ppi_c" stoichiometry="3.238" constant="true"/>
          <speciesReference species="M_DNA_c" stoichiometry="1" constant="true"/>
        </listOfProducts>
        <fbc:geneProductAssociation>
          <fbc:geneProductRef fbc:geneProduct="DNA_Ass"/>
        </fbc:geneProductAssociation>
      </reaction>
      <reaction metaid="R_R_RNA_a" id="R_R_RNA_a" name="RNA_a" reversible="false" fast="false" fbc:lowerFluxBound="FB3N0" fbc:upperFluxBound="FB4N1000">
        <notes>
          <body xmlns="http://www.w3.org/1999/xhtml">
            <p>SUBSYSTEM: </p>
          </body>
        </notes>
        <listOfReactants>
          <speciesReference species="M_atp_c" stoichiometry="1.93" constant="true"/>
          <speciesReference species="M_gtp_c" stoichiometry="1.01" constant="true"/>
          <speciesReference species="M_ctp_c" stoichiometry="0.7" constant="true"/>
          <speciesReference species="M_utp_c" stoichiometry="0.7" constant="true"/>
        </listOfReactants>
        <listOfProducts>
          <speciesReference species="M_adp_c" stoichiometry="1.24" constant="true"/>
          <speciesReference species="M_pi_c" stoichiometry="1.24" constant="true"/>
          <speciesReference species="M_ppi_c" stoichiometry="3.1" constant="true"/>
          <speciesReference species="M_RNA_c" stoichiometry="1" constant="true"/>
        </listOfProducts>
        <fbc:geneProductAssociation>
          <fbc:geneProductRef fbc:geneProduct="RNA_Ass"/>
        </fbc:geneProductAssociation>
      </reaction>
      <reaction metaid="R_R_ARBGALN_a" id="R_R_ARBGALN_a" name="ARBGALN_a" reversible="false" fast="false" fbc:lowerFluxBound="FB3N0" fbc:upperFluxBound="FB4N1000">
        <notes>
          <body xmlns="http://www.w3.org/1999/xhtml">
            <p>SUBSYSTEM: </p>
          </body>
        </notes>
        <listOfReactants>
          <speciesReference species="M_udpgal_c" stoichiometry="0.498" constant="true"/>
          <speciesReference species="M_udpara_c" stoichiometry="4.65" constant="true"/>
        </listOfReactants>
        <listOfProducts>
          <speciesReference species="M_udp_c" stoichiometry="5.148" constant="true"/>
          <speciesReference species="M_ARABINOGALACTAN_c" stoichiometry="1" constant="true"/>
        </listOfProducts>
        <fbc:geneProductAssociation>
          <fbc:geneProductRef fbc:geneProduct="ARABINOGALACTAN_Ass"/>
        </fbc:geneProductAssociation>
      </reaction>
      <reaction metaid="R_R_PTDGLYN_a" id="R_R_PTDGLYN_a" name="PTDGLYN_a" reversible="false" fast="false" fbc:lowerFluxBound="FB3N0" fbc:upperFluxBound="FB4N1000">
        <notes>
          <body xmlns="http://www.w3.org/1999/xhtml">
            <p>SUBSYSTEM: </p>
          </body>
        </notes>
        <listOfReactants>
          <speciesReference species="M_atp_c" stoichiometry="4.426" constant="true"/>
          <speciesReference species="M_gly_c" stoichiometry="1.106" constant="true"/>
          <speciesReference species="M_26dap_M_c" stoichiometry="1.106" constant="true"/>
          <speciesReference species="M_uacgam_c" stoichiometry="1.106" constant="true"/>
          <speciesReference species="M_ALAALA_c" stoichiometry="2.052" constant="true"/>
          <speciesReference species="M_glu_D_c" stoichiometry="1.106" constant="true"/>
          <speciesReference species="M_uamr_c" stoichiometry="1.106" constant="true"/>
        </listOfReactants>
        <listOfProducts>
          <speciesReference species="M_adp_c" stoichiometry="4.426" constant="true"/>
          <speciesReference species="M_pi_c" stoichiometry="4.426" constant="true"/>
          <speciesReference species="M_udp_c" stoichiometry="1.106" constant="true"/>
          <speciesReference species="M_ump_c" stoichiometry="1.106" constant="true"/>
          <speciesReference species="M_ala_L_c" stoichiometry="1.126" constant="true"/>
          <speciesReference species="M_PEPTIDOGLYCAN_c" stoichiometry="1" constant="true"/>
        </listOfProducts>
        <fbc:geneProductAssociation>
          <fbc:geneProductRef fbc:geneProduct="PEPTIDOGLYCAN_Ass"/>
        </fbc:geneProductAssociation>
      </reaction>
      <reaction metaid="R_R_FMYCAC_a" id="R_R_FMYCAC_a" name="FMYCAC_a" reversible="false" fast="false" fbc:lowerFluxBound="FB3N0" fbc:upperFluxBound="FB4N1000">
        <notes>
          <body xmlns="http://www.w3.org/1999/xhtml">
            <p>SUBSYSTEM: </p>
          </body>
        </notes>
        <listOfReactants>
          <speciesReference species="M_C140ACP_c" stoichiometry="0.007" constant="true"/>
          <speciesReference species="M_C150ACP_c" stoichiometry="0.014" constant="true"/>
          <speciesReference species="M_C160ACP_c" stoichiometry="0.437" constant="true"/>
          <speciesReference species="M_C180ACP_c" stoichiometry="0.009" constant="true"/>
          <speciesReference species="M_C161ACP_c" stoichiometry="0.012" constant="true"/>
          <speciesReference species="M_C181ACP_c" stoichiometry="0.521" constant="true"/>
        </listOfReactants>
        <listOfProducts>
          <speciesReference species="M_ACP_c" stoichiometry="1" constant="true"/>
          <speciesReference species="M_FREEMYCOLICACID_c" stoichiometry="1" constant="true"/>
        </listOfProducts>
        <fbc:geneProductAssociation>
          <fbc:geneProductRef fbc:geneProduct="FREEMYCOLICACID_Ass"/>
        </fbc:geneProductAssociation>
      </reaction>
      <reaction metaid="R_R_MYCAC_a" id="R_R_MYCAC_a" name="MYCAC_a" reversible="false" fast="false" fbc:lowerFluxBound="FB3N0" fbc:upperFluxBound="FB4N1000">
        <notes>
          <body xmlns="http://www.w3.org/1999/xhtml">
            <p>SUBSYSTEM: </p>
          </body>
        </notes>
        <listOfReactants>
          <speciesReference species="M_FREEMYCOLICACID_c" stoichiometry="1.875" constant="true"/>
          <speciesReference species="M_TMCM_c" stoichiometry="0.061" constant="true"/>
          <speciesReference species="M_TDCM_c" stoichiometry="0.043" constant="true"/>
        </listOfReactants>
        <listOfProducts>
          <speciesReference species="M_MYCOLICACID_c" stoichiometry="1" constant="true"/>
        </listOfProducts>
        <fbc:geneProductAssociation>
          <fbc:geneProductRef fbc:geneProduct="MYCOLICACID_Ass"/>
        </fbc:geneProductAssociation>
      </reaction>
      <reaction metaid="R_R_PLIP_a" id="R_R_PLIP_a" name="PLIP_a" reversible="false" fast="false" fbc:lowerFluxBound="FB3N0" fbc:upperFluxBound="FB4N1000">
        <notes>
          <body xmlns="http://www.w3.org/1999/xhtml">
            <p>SUBSYSTEM: </p>
          </body>
        </notes>
        <listOfReactants>
          <speciesReference species="M_pa_EC_c" stoichiometry="0.033" constant="true"/>
          <speciesReference species="M_pgp_EC_c" stoichiometry="1.133" constant="true"/>
          <speciesReference species="M_pg_EC_c" stoichiometry="0.007" constant="true"/>
          <speciesReference species="M_PIT_c" stoichiometry="0.042" constant="true"/>
          <speciesReference species="M_PIM_c" stoichiometry="0.065" constant="true"/>
        </listOfReactants>
        <listOfProducts>
          <speciesReference species="M_PHOSPHOLIPID_c" stoichiometry="1" constant="true"/>
        </listOfProducts>
        <fbc:geneProductAssociation>
          <fbc:geneProductRef fbc:geneProduct="PHOSPHOLIPID_Ass"/>
        </fbc:geneProductAssociation>
      </reaction>
      <reaction metaid="R_R_cmt" id="R_R_cmt" name="cmt" reversible="true" fast="false" fbc:lowerFluxBound="FB1N1000" fbc:upperFluxBound="FB4N1000">
        <notes>
          <body xmlns="http://www.w3.org/1999/xhtml">
            <p>SUBSYSTEM: </p>
          </body>
        </notes>
        <listOfReactants>
          <speciesReference species="M_atp_c" stoichiometry="1" constant="true"/>
          <speciesReference species="M_tre_c" stoichiometry="1" constant="true"/>
          <speciesReference species="M_FREEMYCOLICACID_c" stoichiometry="1" constant="true"/>
        </listOfReactants>
        <listOfProducts>
          <speciesReference species="M_adp_c" stoichiometry="1" constant="true"/>
          <speciesReference species="M_TMCM_c" stoichiometry="1" constant="true"/>
        </listOfProducts>
        <fbc:geneProductAssociation>
          <fbc:geneProductRef fbc:geneProduct="cmt"/>
        </fbc:geneProductAssociation>
      </reaction>
      <reaction metaid="R_R_cmt_3" id="R_R_cmt_3" name="cmt_3" reversible="true" fast="false" fbc:lowerFluxBound="FB1N1000" fbc:upperFluxBound="FB4N1000">
        <notes>
          <body xmlns="http://www.w3.org/1999/xhtml">
            <p>SUBSYSTEM: </p>
          </body>
        </notes>
        <listOfReactants>
          <speciesReference species="M_atp_c" stoichiometry="1" constant="true"/>
          <speciesReference species="M_tre_c" stoichiometry="1" constant="true"/>
          <speciesReference species="M_TMCM_c" stoichiometry="1" constant="true"/>
        </listOfReactants>
        <listOfProducts>
          <speciesReference species="M_adp_c" stoichiometry="1" constant="true"/>
          <speciesReference species="M_TDCM_c" stoichiometry="1" constant="true"/>
        </listOfProducts>
        <fbc:geneProductAssociation>
          <fbc:geneProductRef fbc:geneProduct="cmt_3"/>
        </fbc:geneProductAssociation>
      </reaction>
      <reaction metaid="R_R_fas_IA_MA" id="R_R_fas_IA_MA" name="fas-IA_MA" reversible="false" fast="false" fbc:lowerFluxBound="FB3N0" fbc:upperFluxBound="FB4N1000">
        <notes>
          <body xmlns="http://www.w3.org/1999/xhtml">
            <p>SUBSYSTEM: </p>
          </body>
        </notes>
        <listOfReactants>
          <speciesReference species="M_C140ACP_c" stoichiometry="0.071" constant="true"/>
          <speciesReference species="M_C150ACP_c" stoichiometry="0.332" constant="true"/>
          <speciesReference species="M_C160ACP_c" stoichiometry="0.408" constant="true"/>
          <speciesReference species="M_C161ACP_c" stoichiometry="0.189" constant="true"/>
        </listOfReactants>
        <listOfProducts>
          <speciesReference species="M_ACP_c" stoichiometry="1" constant="true"/>
          <speciesReference species="M_FREEMYCOLICACID_c" stoichiometry="1" constant="true"/>
        </listOfProducts>
        <fbc:geneProductAssociation>
          <fbc:geneProductRef fbc:geneProduct="fas__45__IA_MA"/>
        </fbc:geneProductAssociation>
      </reaction>
      <reaction metaid="R_R_r2_7_8_b" id="R_R_r2_7_8_b" name="r2.7.8.b" reversible="false" fast="false" fbc:lowerFluxBound="FB3N0" fbc:upperFluxBound="FB4N1000">
        <notes>
          <body xmlns="http://www.w3.org/1999/xhtml">
            <p>SUBSYSTEM: Membrane Lipid Metabolism</p>
          </body>
        </notes>
        <listOfReactants>
          <speciesReference species="M_cdpdag_EC_c" stoichiometry="1" constant="true"/>
        </listOfReactants>
        <listOfProducts>
          <speciesReference species="M_PIT_c" stoichiometry="1" constant="true"/>
        </listOfProducts>
        <fbc:geneProductAssociation>
          <fbc:geneProductRef fbc:geneProduct="r2__46__7__46__8__46__b"/>
        </fbc:geneProductAssociation>
      </reaction>
      <reaction metaid="R_R_r2_7_8_c" id="R_R_r2_7_8_c" name="r2.7.8.c" reversible="false" fast="false" fbc:lowerFluxBound="FB3N0" fbc:upperFluxBound="FB4N1000">
        <notes>
          <body xmlns="http://www.w3.org/1999/xhtml">
            <p>SUBSYSTEM: Membrane Lipid Metabolism</p>
          </body>
        </notes>
        <listOfReactants>
          <speciesReference species="M_PIT_c" stoichiometry="1" constant="true"/>
        </listOfReactants>
        <listOfProducts>
          <speciesReference species="M_PIM_c" stoichiometry="1" constant="true"/>
        </listOfProducts>
        <fbc:geneProductAssociation>
          <fbc:geneProductRef fbc:geneProduct="r2__46__7__46__8__46__c"/>
        </fbc:geneProductAssociation>
      </reaction>
      <reaction metaid="R_R_cdsA" id="R_R_cdsA" name="cdsA" reversible="true" fast="false" fbc:lowerFluxBound="FB1N1000" fbc:upperFluxBound="FB4N1000">
        <notes>
          <body xmlns="http://www.w3.org/1999/xhtml">
            <p>SUBSYSTEM: Membrane Lipid Metabolism</p>
          </body>
        </notes>
        <listOfReactants>
          <speciesReference species="M_h_c" stoichiometry="1" constant="true"/>
          <speciesReference species="M_pa_EC_c" stoichiometry="1" constant="true"/>
          <speciesReference species="M_ctp_c" stoichiometry="1" constant="true"/>
        </listOfReactants>
        <listOfProducts>
          <speciesReference species="M_cdpdag_EC_c" stoichiometry="1" constant="true"/>
          <speciesReference species="M_ppi_c" stoichiometry="1" constant="true"/>
        </listOfProducts>
        <fbc:geneProductAssociation>
          <fbc:geneProductRef fbc:geneProduct="cdsA"/>
        </fbc:geneProductAssociation>
      </reaction>
      <reaction metaid="R_R_odx" id="R_R_odx" name="odx" reversible="false" fast="false" fbc:lowerFluxBound="FB3N0" fbc:upperFluxBound="FB4N1000">
        <notes>
          <body xmlns="http://www.w3.org/1999/xhtml">
            <p>SUBSYSTEM: Anaplerotic reactions</p>
          </body>
        </notes>
        <listOfReactants>
          <speciesReference species="M_oaa_c" stoichiometry="1" constant="true"/>
        </listOfReactants>
        <listOfProducts>
          <speciesReference species="M_pyr_c" stoichiometry="1" constant="true"/>
          <speciesReference species="M_co2_c" stoichiometry="1" constant="true"/>
        </listOfProducts>
        <fbc:geneProductAssociation>
          <fbc:geneProductRef fbc:geneProduct="Odx"/>
        </fbc:geneProductAssociation>
      </reaction>
      <reaction metaid="R_R_dld2" id="R_R_dld2" name="dld2" reversible="false" fast="false" fbc:lowerFluxBound="FB3N0" fbc:upperFluxBound="FB3N0">
        <notes>
          <body xmlns="http://www.w3.org/1999/xhtml">
            <p>SUBSYSTEM: Oxidative Phosphorylation</p>
          </body>
        </notes>
        <listOfReactants>
          <speciesReference species="M_q8_c" stoichiometry="1" constant="true"/>
          <speciesReference species="M_lac_D_c" stoichiometry="1" constant="true"/>
        </listOfReactants>
        <listOfProducts>
          <speciesReference species="M_pyr_c" stoichiometry="1" constant="true"/>
          <speciesReference species="M_q8h2_c" stoichiometry="1" constant="true"/>
        </listOfProducts>
        <fbc:geneProductAssociation>
          <fbc:geneProductRef fbc:geneProduct="dld2"/>
        </fbc:geneProductAssociation>
      </reaction>
      <reaction metaid="R_R_bc1_aa3_complex" id="R_R_bc1_aa3_complex" name="bc1-aa3-complex" reversible="false" fast="false" fbc:lowerFluxBound="FB3N0" fbc:upperFluxBound="FB4N1000">
        <notes>
          <body xmlns="http://www.w3.org/1999/xhtml">
            <p>SUBSYSTEM: Oxidative Phosphorylation</p>
          </body>
        </notes>
        <listOfReactants>
          <speciesReference species="M_h_c" stoichiometry="6" constant="true"/>
          <speciesReference species="M_q8h2_c" stoichiometry="1" constant="true"/>
          <speciesReference species="M_o2_c" stoichiometry="0.5" constant="true"/>
        </listOfReactants>
        <listOfProducts>
          <speciesReference species="M_h_e" stoichiometry="6" constant="true"/>
          <speciesReference species="M_h2o_c" stoichiometry="1" constant="true"/>
          <speciesReference species="M_q8_c" stoichiometry="1" constant="true"/>
        </listOfProducts>
        <fbc:geneProductAssociation>
          <fbc:and>
            <fbc:geneProductRef fbc:geneProduct="qcrC"/>
            <fbc:geneProductRef fbc:geneProduct="qcrA"/>
            <fbc:geneProductRef fbc:geneProduct="qcrB"/>
            <fbc:geneProductRef fbc:geneProduct="ctaD"/>
            <fbc:geneProductRef fbc:geneProduct="ctaC"/>
            <fbc:geneProductRef fbc:geneProduct="ctaE"/>
            <fbc:geneProductRef fbc:geneProduct="ctaF"/>
          </fbc:and>
        </fbc:geneProductAssociation>
      </reaction>
      <reaction metaid="R_R_katA" id="R_R_katA" name="katA" reversible="false" fast="false" fbc:lowerFluxBound="FB3N0" fbc:upperFluxBound="FB3N0">
        <notes>
          <body xmlns="http://www.w3.org/1999/xhtml">
            <p>SUBSYSTEM: </p>
          </body>
        </notes>
        <listOfReactants>
          <speciesReference species="M_h2o2_c" stoichiometry="2" constant="true"/>
        </listOfReactants>
        <listOfProducts>
          <speciesReference species="M_h2o_c" stoichiometry="2" constant="true"/>
          <speciesReference species="M_o2_c" stoichiometry="1" constant="true"/>
        </listOfProducts>
        <fbc:geneProductAssociation/>
      </reaction>
      <reaction metaid="R_R_putA1" id="R_R_putA1" name="putA1" reversible="false" fast="false" fbc:lowerFluxBound="FB3N0" fbc:upperFluxBound="FB4N1000">
        <notes>
          <body xmlns="http://www.w3.org/1999/xhtml">
            <p>SUBSYSTEM: Arginine and Proline Metabolism</p>
          </body>
        </notes>
        <listOfReactants>
          <speciesReference species="M_h2o_c" stoichiometry="2" constant="true"/>
          <speciesReference species="M_nad_c" stoichiometry="1" constant="true"/>
          <speciesReference species="M_1pyr5c_c" stoichiometry="1" constant="true"/>
        </listOfReactants>
        <listOfProducts>
          <speciesReference species="M_h_c" stoichiometry="1" constant="true"/>
          <speciesReference species="M_nadh_c" stoichiometry="1" constant="true"/>
          <speciesReference species="M_glu_L_c" stoichiometry="1" constant="true"/>
        </listOfProducts>
        <fbc:geneProductAssociation>
          <fbc:geneProductRef fbc:geneProduct="putA1"/>
        </fbc:geneProductAssociation>
      </reaction>
      <reaction metaid="R_R_aspA" id="R_R_aspA" name="aspA" reversible="false" fast="false" fbc:lowerFluxBound="FB3N0" fbc:upperFluxBound="FB4N1000">
        <notes>
          <body xmlns="http://www.w3.org/1999/xhtml">
            <p>SUBSYSTEM: Alanine and Aspartate Metabolism</p>
          </body>
        </notes>
        <listOfReactants>
          <speciesReference species="M_asp_L_c" stoichiometry="1" constant="true"/>
        </listOfReactants>
        <listOfProducts>
          <speciesReference species="M_fum_c" stoichiometry="1" constant="true"/>
          <speciesReference species="M_nh3_c" stoichiometry="1" constant="true"/>
        </listOfProducts>
        <fbc:geneProductAssociation>
          <fbc:geneProductRef fbc:geneProduct="aspA"/>
        </fbc:geneProductAssociation>
      </reaction>
      <reaction metaid="R_R_glgP1" id="R_R_glgP1" name="glgP1" reversible="false" fast="false" fbc:lowerFluxBound="FB3N0" fbc:upperFluxBound="FB4N1000">
        <notes>
          <body xmlns="http://www.w3.org/1999/xhtml">
            <p>SUBSYSTEM: Alternate Carbon Metabolism</p>
          </body>
        </notes>
        <listOfReactants>
          <speciesReference species="M_pi_c" stoichiometry="1" constant="true"/>
          <speciesReference species="M_glycogen_c" stoichiometry="1" constant="true"/>
        </listOfReactants>
        <listOfProducts>
          <speciesReference species="M_g1p_c" stoichiometry="1" constant="true"/>
        </listOfProducts>
        <fbc:geneProductAssociation>
          <fbc:geneProductRef fbc:geneProduct="glgP2"/>
        </fbc:geneProductAssociation>
      </reaction>
      <reaction metaid="R_R_ALA_B_deg" id="R_R_ALA_B_deg" name="ALA-B_deg" reversible="false" fast="false" fbc:lowerFluxBound="FB3N0" fbc:upperFluxBound="FB4N1000">
        <notes>
          <body xmlns="http://www.w3.org/1999/xhtml">
            <p>SUBSYSTEM: Alanine and Aspartate Metabolism</p>
          </body>
        </notes>
        <listOfReactants>
          <speciesReference species="M_akg_c" stoichiometry="1" constant="true"/>
          <speciesReference species="M_ala_B_c" stoichiometry="1" constant="true"/>
        </listOfReactants>
        <listOfProducts>
          <speciesReference species="M_glu_L_c" stoichiometry="1" constant="true"/>
          <speciesReference species="M_malts_c" stoichiometry="1" constant="true"/>
        </listOfProducts>
        <fbc:geneProductAssociation>
          <fbc:geneProductRef fbc:geneProduct="bALA_degrade"/>
        </fbc:geneProductAssociation>
      </reaction>
      <reaction metaid="R_R_aspn" id="R_R_aspn" name="aspn" reversible="false" fast="false" fbc:lowerFluxBound="FB3N0" fbc:upperFluxBound="FB4N1000">
        <notes>
          <body xmlns="http://www.w3.org/1999/xhtml">
            <p>SUBSYSTEM: Alanine and Aspartate Metabolism</p>
          </body>
        </notes>
        <listOfReactants>
          <speciesReference species="M_h2o_c" stoichiometry="1" constant="true"/>
          <speciesReference species="M_asn_L_c" stoichiometry="1" constant="true"/>
        </listOfReactants>
        <listOfProducts>
          <speciesReference species="M_asp_L_c" stoichiometry="1" constant="true"/>
          <speciesReference species="M_nh3_c" stoichiometry="1" constant="true"/>
        </listOfProducts>
        <fbc:geneProductAssociation>
          <fbc:geneProductRef fbc:geneProduct="asp"/>
        </fbc:geneProductAssociation>
      </reaction>
      <reaction metaid="R_R_metF" id="R_R_metF" name="metF" reversible="false" fast="false" fbc:lowerFluxBound="FB3N0" fbc:upperFluxBound="FB4N1000">
        <notes>
          <body xmlns="http://www.w3.org/1999/xhtml">
            <p>SUBSYSTEM: Folate Metabolism</p>
          </body>
        </notes>
        <listOfReactants>
          <speciesReference species="M_h_c" stoichiometry="1" constant="true"/>
          <speciesReference species="M_nadph_c" stoichiometry="1" constant="true"/>
          <speciesReference species="M_methf_c" stoichiometry="1" constant="true"/>
        </listOfReactants>
        <listOfProducts>
          <speciesReference species="M_nadp_c" stoichiometry="1" constant="true"/>
          <speciesReference species="M_mlthf_c" stoichiometry="1" constant="true"/>
        </listOfProducts>
        <fbc:geneProductAssociation>
          <fbc:geneProductRef fbc:geneProduct="metF"/>
        </fbc:geneProductAssociation>
      </reaction>
      <reaction metaid="R_R_ocd" id="R_R_ocd" name="ocd" reversible="false" fast="false" fbc:lowerFluxBound="FB3N0" fbc:upperFluxBound="FB3N0">
        <notes>
          <body xmlns="http://www.w3.org/1999/xhtml">
            <p>SUBSYSTEM: Arginine and Proline Metabolism</p>
          </body>
        </notes>
        <listOfReactants>
          <speciesReference species="M_orn_c" stoichiometry="1" constant="true"/>
        </listOfReactants>
        <listOfProducts>
          <speciesReference species="M_pro_L_c" stoichiometry="1" constant="true"/>
          <speciesReference species="M_nh3_c" stoichiometry="1" constant="true"/>
        </listOfProducts>
        <fbc:geneProductAssociation>
          <fbc:geneProductRef fbc:geneProduct="ocd"/>
        </fbc:geneProductAssociation>
      </reaction>
      <reaction metaid="R_R_thyX" id="R_R_thyX" name="thyX" reversible="true" fast="false" fbc:lowerFluxBound="FB1N1000" fbc:upperFluxBound="FB4N1000">
        <notes>
          <body xmlns="http://www.w3.org/1999/xhtml">
            <p>SUBSYSTEM: Nucleotide Salvage Pathway</p>
          </body>
        </notes>
        <listOfReactants>
          <speciesReference species="M_mlthf_c" stoichiometry="1" constant="true"/>
          <speciesReference species="M_fadh2_c" stoichiometry="1" constant="true"/>
        </listOfReactants>
        <listOfProducts>
          <speciesReference species="M_thf_c" stoichiometry="1" constant="true"/>
          <speciesReference species="M_fad_c" stoichiometry="1" constant="true"/>
        </listOfProducts>
        <fbc:geneProductAssociation>
          <fbc:geneProductRef fbc:geneProduct="thyX"/>
        </fbc:geneProductAssociation>
      </reaction>
      <reaction metaid="R_R_pyrG_1" id="R_R_pyrG_1" name="pyrG_1" reversible="false" fast="false" fbc:lowerFluxBound="FB3N0" fbc:upperFluxBound="FB4N1000">
        <notes>
          <body xmlns="http://www.w3.org/1999/xhtml">
            <p>SUBSYSTEM: Nucleotide Salvage Pathway</p>
          </body>
        </notes>
        <listOfReactants>
          <speciesReference species="M_atp_c" stoichiometry="1" constant="true"/>
          <speciesReference species="M_nh3_c" stoichiometry="1" constant="true"/>
          <speciesReference species="M_utp_c" stoichiometry="1" constant="true"/>
        </listOfReactants>
        <listOfProducts>
          <speciesReference species="M_adp_c" stoichiometry="1" constant="true"/>
          <speciesReference species="M_pi_c" stoichiometry="1" constant="true"/>
          <speciesReference species="M_ctp_c" stoichiometry="1" constant="true"/>
        </listOfProducts>
        <fbc:geneProductAssociation>
          <fbc:geneProductRef fbc:geneProduct="pyrG_1"/>
        </fbc:geneProductAssociation>
      </reaction>
      <reaction metaid="R_R_dcd_1" id="R_R_dcd_1" name="dcd_1" reversible="false" fast="false" fbc:lowerFluxBound="FB3N0" fbc:upperFluxBound="FB4N1000">
        <notes>
          <body xmlns="http://www.w3.org/1999/xhtml">
            <p>SUBSYSTEM: Nucleotide Salvage Pathway</p>
          </body>
        </notes>
        <listOfReactants>
          <speciesReference species="M_ctp_c" stoichiometry="1" constant="true"/>
        </listOfReactants>
        <listOfProducts>
          <speciesReference species="M_nh3_c" stoichiometry="1" constant="true"/>
          <speciesReference species="M_utp_c" stoichiometry="1" constant="true"/>
        </listOfProducts>
        <fbc:geneProductAssociation>
          <fbc:geneProductRef fbc:geneProduct="dcd_1"/>
        </fbc:geneProductAssociation>
      </reaction>
      <reaction metaid="R_R_umk" id="R_R_umk" name="umk" reversible="false" fast="false" fbc:lowerFluxBound="FB3N0" fbc:upperFluxBound="FB4N1000">
        <notes>
          <body xmlns="http://www.w3.org/1999/xhtml">
            <p>SUBSYSTEM: Nucleotide Salvage Pathway</p>
          </body>
        </notes>
        <listOfReactants>
          <speciesReference species="M_atp_c" stoichiometry="1" constant="true"/>
          <speciesReference species="M_dump_c" stoichiometry="1" constant="true"/>
        </listOfReactants>
        <listOfProducts>
          <speciesReference species="M_adp_c" stoichiometry="1" constant="true"/>
          <speciesReference species="M_dudp_c" stoichiometry="1" constant="true"/>
        </listOfProducts>
        <fbc:geneProductAssociation>
          <fbc:geneProductRef fbc:geneProduct="umk"/>
        </fbc:geneProductAssociation>
      </reaction>
      <reaction metaid="R_R_adk_2" id="R_R_adk_2" name="adk_2" reversible="true" fast="false" fbc:lowerFluxBound="FB1N1000" fbc:upperFluxBound="FB4N1000">
        <notes>
          <body xmlns="http://www.w3.org/1999/xhtml">
            <p>SUBSYSTEM: Nucleotide Salvage Pathway</p>
          </body>
        </notes>
        <listOfReactants>
          <speciesReference species="M_atp_c" stoichiometry="1" constant="true"/>
          <speciesReference species="M_damp_c" stoichiometry="1" constant="true"/>
        </listOfReactants>
        <listOfProducts>
          <speciesReference species="M_adp_c" stoichiometry="1" constant="true"/>
          <speciesReference species="M_dadp_c" stoichiometry="1" constant="true"/>
        </listOfProducts>
        <fbc:geneProductAssociation>
          <fbc:geneProductRef fbc:geneProduct="adk_2"/>
        </fbc:geneProductAssociation>
      </reaction>
      <reaction metaid="R_R_cmk_3" id="R_R_cmk_3" name="cmk_3" reversible="true" fast="false" fbc:lowerFluxBound="FB1N1000" fbc:upperFluxBound="FB4N1000">
        <notes>
          <body xmlns="http://www.w3.org/1999/xhtml">
            <p>SUBSYSTEM: Nucleotide Salvage Pathway</p>
          </body>
        </notes>
        <listOfReactants>
          <speciesReference species="M_atp_c" stoichiometry="1" constant="true"/>
          <speciesReference species="M_dcmp_c" stoichiometry="1" constant="true"/>
        </listOfReactants>
        <listOfProducts>
          <speciesReference species="M_adp_c" stoichiometry="1" constant="true"/>
          <speciesReference species="M_dcdp_c" stoichiometry="1" constant="true"/>
        </listOfProducts>
        <fbc:geneProductAssociation>
          <fbc:geneProductRef fbc:geneProduct="cmk_3"/>
        </fbc:geneProductAssociation>
      </reaction>
      <reaction metaid="R_R_gmk_2" id="R_R_gmk_2" name="gmk_2" reversible="true" fast="false" fbc:lowerFluxBound="FB1N1000" fbc:upperFluxBound="FB4N1000">
        <notes>
          <body xmlns="http://www.w3.org/1999/xhtml">
            <p>SUBSYSTEM: Nucleotide Salvage Pathway</p>
          </body>
        </notes>
        <listOfReactants>
          <speciesReference species="M_atp_c" stoichiometry="1" constant="true"/>
          <speciesReference species="M_dgmp_c" stoichiometry="1" constant="true"/>
        </listOfReactants>
        <listOfProducts>
          <speciesReference species="M_adp_c" stoichiometry="1" constant="true"/>
          <speciesReference species="M_dgdp_c" stoichiometry="1" constant="true"/>
        </listOfProducts>
        <fbc:geneProductAssociation>
          <fbc:geneProductRef fbc:geneProduct="gmk_2"/>
        </fbc:geneProductAssociation>
      </reaction>
      <reaction metaid="R_R_nrdD_1" id="R_R_nrdD_1" name="nrdD_1" reversible="false" fast="false" fbc:lowerFluxBound="FB3N0" fbc:upperFluxBound="FB4N1000">
        <notes>
          <body xmlns="http://www.w3.org/1999/xhtml">
            <p>SUBSYSTEM: Nucleotide Salvage Pathway</p>
          </body>
        </notes>
        <listOfReactants>
          <speciesReference species="M_atp_c" stoichiometry="1" constant="true"/>
          <speciesReference species="M_trdrd_c" stoichiometry="1" constant="true"/>
        </listOfReactants>
        <listOfProducts>
          <speciesReference species="M_h2o_c" stoichiometry="1" constant="true"/>
          <speciesReference species="M_trdox_c" stoichiometry="1" constant="true"/>
          <speciesReference species="M_datp_c" stoichiometry="1" constant="true"/>
        </listOfProducts>
        <fbc:geneProductAssociation>
          <fbc:geneProductRef fbc:geneProduct="nrdD_1"/>
        </fbc:geneProductAssociation>
      </reaction>
      <reaction metaid="R_R_nucA_1" id="R_R_nucA_1" name="nucA_1" reversible="false" fast="false" fbc:lowerFluxBound="FB3N0" fbc:upperFluxBound="FB4N1000">
        <notes>
          <body xmlns="http://www.w3.org/1999/xhtml">
            <p>SUBSYSTEM: Nucleotide Salvage Pathway</p>
          </body>
        </notes>
        <listOfReactants>
          <speciesReference species="M_h2o_c" stoichiometry="1" constant="true"/>
          <speciesReference species="M_amp_c" stoichiometry="1" constant="true"/>
        </listOfReactants>
        <listOfProducts>
          <speciesReference species="M_pi_c" stoichiometry="1" constant="true"/>
          <speciesReference species="M_adn_c" stoichiometry="1" constant="true"/>
        </listOfProducts>
        <fbc:geneProductAssociation>
          <fbc:geneProductRef fbc:geneProduct="nucA_1"/>
        </fbc:geneProductAssociation>
      </reaction>
      <reaction metaid="R_R_nucA_3" id="R_R_nucA_3" name="nucA_3" reversible="false" fast="false" fbc:lowerFluxBound="FB3N0" fbc:upperFluxBound="FB4N1000">
        <notes>
          <body xmlns="http://www.w3.org/1999/xhtml">
            <p>SUBSYSTEM: Nucleotide Salvage Pathway</p>
          </body>
        </notes>
        <listOfReactants>
          <speciesReference species="M_h2o_c" stoichiometry="1" constant="true"/>
          <speciesReference species="M_xmp_c" stoichiometry="1" constant="true"/>
        </listOfReactants>
        <listOfProducts>
          <speciesReference species="M_pi_c" stoichiometry="1" constant="true"/>
          <speciesReference species="M_xtsn_c" stoichiometry="1" constant="true"/>
        </listOfProducts>
        <fbc:geneProductAssociation>
          <fbc:geneProductRef fbc:geneProduct="nucA_3"/>
        </fbc:geneProductAssociation>
      </reaction>
      <reaction metaid="R_R_nucA_8" id="R_R_nucA_8" name="nucA_8" reversible="false" fast="false" fbc:lowerFluxBound="FB3N0" fbc:upperFluxBound="FB4N1000">
        <notes>
          <body xmlns="http://www.w3.org/1999/xhtml">
            <p>SUBSYSTEM: Nucleotide Salvage Pathway</p>
          </body>
        </notes>
        <listOfReactants>
          <speciesReference species="M_h2o_c" stoichiometry="1" constant="true"/>
          <speciesReference species="M_dump_c" stoichiometry="1" constant="true"/>
        </listOfReactants>
        <listOfProducts>
          <speciesReference species="M_pi_c" stoichiometry="1" constant="true"/>
          <speciesReference species="M_duri_c" stoichiometry="1" constant="true"/>
        </listOfProducts>
        <fbc:geneProductAssociation>
          <fbc:geneProductRef fbc:geneProduct="nucA_8"/>
        </fbc:geneProductAssociation>
      </reaction>
      <reaction metaid="R_R_nucA_9" id="R_R_nucA_9" name="nucA_9" reversible="false" fast="false" fbc:lowerFluxBound="FB3N0" fbc:upperFluxBound="FB4N1000">
        <notes>
          <body xmlns="http://www.w3.org/1999/xhtml">
            <p>SUBSYSTEM: Nucleotide Salvage Pathway</p>
          </body>
        </notes>
        <listOfReactants>
          <speciesReference species="M_h2o_c" stoichiometry="1" constant="true"/>
          <speciesReference species="M_dcmp_c" stoichiometry="1" constant="true"/>
        </listOfReactants>
        <listOfProducts>
          <speciesReference species="M_pi_c" stoichiometry="1" constant="true"/>
          <speciesReference species="M_dcyt_c" stoichiometry="1" constant="true"/>
        </listOfProducts>
        <fbc:geneProductAssociation>
          <fbc:geneProductRef fbc:geneProduct="nucA_9"/>
        </fbc:geneProductAssociation>
      </reaction>
      <reaction metaid="R_R_nucA_10" id="R_R_nucA_10" name="nucA_10" reversible="false" fast="false" fbc:lowerFluxBound="FB3N0" fbc:upperFluxBound="FB4N1000">
        <notes>
          <body xmlns="http://www.w3.org/1999/xhtml">
            <p>SUBSYSTEM: Nucleotide Salvage Pathway</p>
          </body>
        </notes>
        <listOfReactants>
          <speciesReference species="M_h2o_c" stoichiometry="1" constant="true"/>
          <speciesReference species="M_damp_c" stoichiometry="1" constant="true"/>
        </listOfReactants>
        <listOfProducts>
          <speciesReference species="M_pi_c" stoichiometry="1" constant="true"/>
          <speciesReference species="M_dad_2_c" stoichiometry="1" constant="true"/>
        </listOfProducts>
        <fbc:geneProductAssociation>
          <fbc:geneProductRef fbc:geneProduct="nucA_10"/>
        </fbc:geneProductAssociation>
      </reaction>
      <reaction metaid="R_R_ushA" id="R_R_ushA" name="ushA" reversible="false" fast="false" fbc:lowerFluxBound="FB3N0" fbc:upperFluxBound="FB4N1000">
        <notes>
          <body xmlns="http://www.w3.org/1999/xhtml">
            <p>SUBSYSTEM: </p>
          </body>
        </notes>
        <listOfReactants>
          <speciesReference species="M_udpg_c" stoichiometry="1" constant="true"/>
        </listOfReactants>
        <listOfProducts>
          <speciesReference species="M_g6p_c" stoichiometry="1" constant="true"/>
          <speciesReference species="M_ump_c" stoichiometry="1" constant="true"/>
        </listOfProducts>
        <fbc:geneProductAssociation>
          <fbc:geneProductRef fbc:geneProduct="ushA"/>
        </fbc:geneProductAssociation>
      </reaction>
      <reaction metaid="R_R_r3_1_5_1" id="R_R_r3_1_5_1" name="r3.1.5.1" reversible="false" fast="false" fbc:lowerFluxBound="FB3N0" fbc:upperFluxBound="FB4N1000">
        <notes>
          <body xmlns="http://www.w3.org/1999/xhtml">
            <p>SUBSYSTEM: Nucleotide Salvage Pathway</p>
          </body>
        </notes>
        <listOfReactants>
          <speciesReference species="M_h2o_c" stoichiometry="1" constant="true"/>
          <speciesReference species="M_dgtp_c" stoichiometry="1" constant="true"/>
        </listOfReactants>
        <listOfProducts>
          <speciesReference species="M_pi_c" stoichiometry="3" constant="true"/>
          <speciesReference species="M_dgsn_c" stoichiometry="1" constant="true"/>
        </listOfProducts>
        <fbc:geneProductAssociation>
          <fbc:geneProductRef fbc:geneProduct="r3__46__1__46__5__46__1"/>
        </fbc:geneProductAssociation>
      </reaction>
      <reaction metaid="R_R_NCgl0233_NCgl1244" id="R_R_NCgl0233_NCgl1244" name="NCgl0233+NCgl1244" reversible="false" fast="false" fbc:lowerFluxBound="FB3N0" fbc:upperFluxBound="FB4N1000">
        <notes>
          <body xmlns="http://www.w3.org/1999/xhtml">
            <p>SUBSYSTEM: Cofactor and Prosthetic Group Biosynthesis</p>
          </body>
        </notes>
        <listOfReactants>
          <speciesReference species="M_atp_c" stoichiometry="1" constant="true"/>
          <speciesReference species="M_glu_L_c" stoichiometry="1" constant="true"/>
          <speciesReference species="M_trnaglu_c" stoichiometry="1" constant="true"/>
        </listOfReactants>
        <listOfProducts>
          <speciesReference species="M_amp_c" stoichiometry="1" constant="true"/>
          <speciesReference species="M_ppi_c" stoichiometry="1" constant="true"/>
          <speciesReference species="M_glutrna_c" stoichiometry="1" constant="true"/>
        </listOfProducts>
        <fbc:geneProductAssociation>
          <fbc:geneProductRef fbc:geneProduct="NCgl0233__43__NCgl1244"/>
        </fbc:geneProductAssociation>
      </reaction>
      <reaction metaid="R_R_hemA" id="R_R_hemA" name="hemA" reversible="false" fast="false" fbc:lowerFluxBound="FB3N0" fbc:upperFluxBound="FB4N1000">
        <notes>
          <body xmlns="http://www.w3.org/1999/xhtml">
            <p>SUBSYSTEM: Cofactor and Prosthetic Group Biosynthesis</p>
          </body>
        </notes>
        <listOfReactants>
          <speciesReference species="M_h_c" stoichiometry="1" constant="true"/>
          <speciesReference species="M_nadph_c" stoichiometry="1" constant="true"/>
          <speciesReference species="M_glutrna_c" stoichiometry="1" constant="true"/>
        </listOfReactants>
        <listOfProducts>
          <speciesReference species="M_nadp_c" stoichiometry="1" constant="true"/>
          <speciesReference species="M_trnaglu_c" stoichiometry="1" constant="true"/>
          <speciesReference species="M_glu1sa_c" stoichiometry="1" constant="true"/>
        </listOfProducts>
        <fbc:geneProductAssociation>
          <fbc:geneProductRef fbc:geneProduct="hemA"/>
        </fbc:geneProductAssociation>
      </reaction>
      <reaction metaid="R_R_hemL" id="R_R_hemL" name="hemL" reversible="false" fast="false" fbc:lowerFluxBound="FB3N0" fbc:upperFluxBound="FB4N1000">
        <notes>
          <body xmlns="http://www.w3.org/1999/xhtml">
            <p>SUBSYSTEM: Cofactor and Prosthetic Group Biosynthesis</p>
[truncated: 204,308 more chars]
